# Supplementary material for: SMG1 Identified as a Regulator of Parkinson’s Disease-Associated alpha-Synuclein through siRNA Screening
Source: PLoS One. 2013 Oct 30;8(10):e77711. doi: 10.1371/journal.pone.0077711 (PMC3813773; doi:10.1371/journal.pone.0077711)
Supplement: Table S1 — All siRNA screening data. Shown in the table are the gene symbol, Entrez ID number, full gene name, siRNA library set from which siRNAs were drawn, the specific siRNA sequences for all siRNAs, the Z score for each siRNA, and the fold change in the ration of pSyn/tSyn relative to non-silencing siRNA control. (XLSX) [file pone.0077711.s002.xlsx]

## Sheet: Sheet1
Gene Name	Entrez ID	Description	Library	siRNA Sequence	Zscore	Fold Change
AAK1	22848	AP2 associated kinase 1	Kinase Set	AACGTGAGTAGCGGTGATGTA	1.15	1.19566
AAK1	22848	AP2 associated kinase 1	Kinase Set	CCAGGTGGTAAACCTGATGAA	-0.8	1.02041
AAK1	22848	AP2 associated kinase 1	Kinase Set	AGGCGTATTCTCAGTGACGTA	0.58	1.06203
AAK1	22848	AP2 associated kinase 1	Kinase Set	CTCCTCGGACCTCTCAACAAA	-0.31	0.940355
AATK	9625	apoptosis-associated tyrosine kinase	Kinase Set	CACGCACGTGTCTGACTCGGA	0.14	0.929082
AATK	9625	apoptosis-associated tyrosine kinase	Kinase Set	CTGCACCTTCATCGCAACAAT	-0.05	0.891964
AATK	9625	apoptosis-associated tyrosine kinase	Kinase Set	AGCGAGGATGGTGACCGAGAA	0.76	1.01368
AATK	9625	apoptosis-associated tyrosine kinase	Kinase Set	CAGGGCCCTGAAGCACAGCAA	0.38	1.04486
ABL1	25	c-abl oncogene 1, receptor tyrosine kinase	Kinase Set	CCAGTGGAGATAACACTCTAA	-0.07	0.95592
ABL1	25	c-abl oncogene 1, receptor tyrosine kinase	Kinase Set	ACGCACGGACATCACCATGAA	0.28	1.00187
ABL1	25	c-abl oncogene 1, receptor tyrosine kinase	Kinase Set	AACGGCTGATGTGGACTGTCT	0	1.04554
ABL1	25	c-abl oncogene 1, receptor tyrosine kinase	Kinase Set	ACCCGAGTGTCTCTTCGGAAA	1.03	1.21007
ABL2	27	v-abl Abelson murine leukemia viral oncogene homolog 2 (arg, Abelson-related gene)	Kinase Set	CAGGTCTATGACCTACTAGAA	0	0.957614
ABL2	27	v-abl Abelson murine leukemia viral oncogene homolog 2 (arg, Abelson-related gene)	Kinase Set	CTGGGCTTACGAGCAGGTAAA	-1.54	0.815134
ABL2	27	v-abl Abelson murine leukemia viral oncogene homolog 2 (arg, Abelson-related gene)	Kinase Set	ATCAAGCATCCTAATCTGGTA	0	1.09545
ABL2	27	v-abl Abelson murine leukemia viral oncogene homolog 2 (arg, Abelson-related gene)	Kinase Set	TGGAGCCAAATTTCCTATTAA	0.42	1.14756
ACP1	52	acid phosphatase 1, soluble	Phosphatase Set	CCCATAGTGCACACTTGTATA	-2.68	0.939478
ACP1	52	acid phosphatase 1, soluble	Phosphatase Set	TCCGTAGGAGCTCACAGTCTA	-4.1	0.634479
ACP1	52	acid phosphatase 1, soluble	Phosphatase Set	TCGGTGTGTAATCACGTTCCA	-4.02	0.925645
ACP1	52	acid phosphatase 1, soluble	Phosphatase Set	ATGGATGAAAGCAATCTGAGA	-3.79	0.811575
ACP2	53	acid phosphatase 2, lysosomal	Phosphatase Set	CAGCCTGAAGTCTTCGGCAAA	-2.53	0.866384
ACP2	53	acid phosphatase 2, lysosomal	Phosphatase Set	CTGGATGTCTACAATGGTGAA	-0.83	0.849404
ACP2	53	acid phosphatase 2, lysosomal	Phosphatase Set	ACCAGTGAAGACATATCCCAA	-0.47	0.967009
ACP2	53	acid phosphatase 2, lysosomal	Phosphatase Set	CAGCGCTATCACGGCTTCCTA	-1.48	0.859965
ACP5	54	acid phosphatase 5, tartrate resistant	Phosphatase Set	CTCGGGCAAGTCCCTCTTTAA	0.17	0.982002
ACP5	54	acid phosphatase 5, tartrate resistant	Phosphatase Set	CTGGTACGTGCTAGCCGGAAA	0.44	0.884637
ACP5	54	acid phosphatase 5, tartrate resistant	Phosphatase Set	ACGGCGCTGCTCATCCTGCAA	0.63	1.06019
ACP5	54	acid phosphatase 5, tartrate resistant	Phosphatase Set	CACTGGTGTGCAAGACATCAA	0.84	0.932167
ACP6	51205	acid phosphatase 6, lysophosphatidic	Phosphatase Set	CCATGTCAGTTTATACCTTAA	0.58	1.26915
ACP6	51205	acid phosphatase 6, lysophosphatidic	Phosphatase Set	CCCGCTGGACATGTTCTTGAA	-0.96	1.18901
ACP6	51205	acid phosphatase 6, lysophosphatidic	Phosphatase Set	GTGCCTTTATACAATGCCAAA	0.24	1.07932
ACP6	51205	acid phosphatase 6, lysophosphatidic	Phosphatase Set	GAGGCCAAACTTGAAATACAA	-1.57	0.761863
ACPP	55	acid phosphatase, prostate	Phosphatase Set	ACAGATGGCGCTAGATGTTTA	0.53	1.1358
ACPP	55	acid phosphatase, prostate	Phosphatase Set	CCGGACTTTGATGAGTGCTAT	0.25	0.833633
ACPP	55	acid phosphatase, prostate	Phosphatase Set	CTCTATTACCATTATGGATAA	0.41	1.13104
ACPP	55	acid phosphatase, prostate	Phosphatase Set	ATGAACAGGTTTATATTCGAA	0.2	0.931161
ACPT	93650	acid phosphatase, testicular	Phosphatase Set	CCCGCCAAAGATGGAGGGAAT	1.02	1.09826
ACPT	93650	acid phosphatase, testicular	Phosphatase Set	CTGGTGTTCGTGGCTCTGGTA	-0.93	0.786838
ACPT	93650	acid phosphatase, testicular	Phosphatase Set	CTGCTGAATGCTATCCTTGCA	0.88	1.075
ACPT	93650	acid phosphatase, testicular	Phosphatase Set	CAGGGCATGGAAGGTTCTGGA	0	0.865086
ACVR1	90	activin A receptor, type I	Kinase Set	CGGATGGTGAGCAATGGTATA	0.84	1.07557
ACVR1	90	activin A receptor, type I	Kinase Set	CTGGTCTGTCTTTGGATAATA	-0.19	0.872134
ACVR1	90	activin A receptor, type I	Kinase Set	AAGAATGGACAGTGTTGCATA	0	1.14769
ACVR1	90	activin A receptor, type I	Kinase Set	GTGGAGTATGGCACTATCGAA	-0.04	0.896996
ACVR1B	91	activin A receptor, type IB	Kinase Set	ATGGAGATCGTGGGCACCCAA	1.08	1.16455
ACVR1B	91	activin A receptor, type IB	Kinase Set	TCGGGCTTGTATATTGGGAGA	-0.33	0.798369
ACVR1B	91	activin A receptor, type IB	Kinase Set	TTCCTTGTCATTAACTATCAT	0.39	1.12765
ACVR1B	91	activin A receptor, type IB	Kinase Set	CAGGGAAGCAGAGATATACCA	0.01	0.975204
ACVR2A	92	activin A receptor, type IIA	Kinase Set	GAGGTATTAGAGGGTGCTATA	-0.14	1.01582
ACVR2A	92	activin A receptor, type IIA	Kinase Set	TCCACGGTTGCTAAATTATAA	0.69	1.08711
ACVR2A	92	activin A receptor, type IIA	Kinase Set	AGCCCAGTTGCTTAACGAATA	1.69	1.25493
ACVR2A	92	activin A receptor, type IIA	Kinase Set	TTGGGTGTACAGGCATCACAA	-0.62	0.983757
ACVR2B	93	activin A receptor, type IIB	Kinase Set	TACGGTCATGTGGACATCCAT	-4.39	0.812271
ACVR2B	93	activin A receptor, type IIB	Kinase Set	AAGATGAGGCCCACCATTAAA	0.05	1.12683
ACVR2B	93	activin A receptor, type IIB	Kinase Set	AAGTAAGAATGTATTGCTGAA	-2.02	0.897031
ACVR2B	93	activin A receptor, type IIB	Kinase Set	CAGCTCATAGAGGTAACCGAA	1.2	1.08412
ACVRL1	94	activin A receptor type II-like 1	Kinase Set	CACCGAGTTCGTCAACCACTA	0.84	1.06103
ACVRL1	94	activin A receptor type II-like 1	Kinase Set	CACGGACTGCTTTGAGTCCTA	0.81	0.863487
ACVRL1	94	activin A receptor type II-like 1	Kinase Set	CACCGCGCTGCGGATCAAGAA	-3.3	0.762455
ACVRL1	94	activin A receptor type II-like 1	Kinase Set	TGCGGGAGTGCTGGTACCCAA	2.3	1.1283
ADCK1	57143	aarF domain containing kinase 1	Kinase Set	TACGACGGCTGTCATCAGTTA	-0.27	0.911321
ADCK1	57143	aarF domain containing kinase 1	Kinase Set	TGGGCGGACGGTGGCCGTGAA	0.05	0.967398
ADCK1	57143	aarF domain containing kinase 1	Kinase Set	TAACAAGTACTTGGACCCTAA	0.09	0.989064
ADCK1	57143	aarF domain containing kinase 1	Kinase Set	CGGCAATGTACTGGTGCGGAA	-0.01	0.980503
ADCK2	90956	aarF domain containing kinase 2	Kinase Set	CAGATTGACCTGCGTTACGAA	-0.5	0.896413
ADCK2	90956	aarF domain containing kinase 2	Kinase Set	CCGGAATGTGAAAGCCGTCAA	-1.33	0.967138
ADCK2	90956	aarF domain containing kinase 2	Kinase Set	CAGACCAGTCGTTTCTAGAAA	0.31	1.05275
ADCK2	90956	aarF domain containing kinase 2	Kinase Set	TACGAAGCTCAGAATCTAGAA	-0.14	0.924699
ADCK4	79934	aarF domain containing kinase 4	Kinase Set	CAGATGCTGAGAGTTCTTGAA	-0.81	0.986105
ADCK4	79934	aarF domain containing kinase 4	Kinase Set	GACAGAGTTCACAGACCATTA	-0.03	1.10117
ADCK4	79934	aarF domain containing kinase 4	Kinase Set	CTGAATCTTCAATCGGAATAA	-0.3	1.1713
ADCK4	79934	aarF domain containing kinase 4	Kinase Set	CTGGGCCAACTTCCTGTATGA	-0.18	0.816579
ADCK5	203054	aarF domain containing kinase 5	Kinase Set	CCGCTACTTCCTTATGGCTAA	0.85	1.07503
ADCK5	203054	aarF domain containing kinase 5	Kinase Set	AAGGCCTTTGCTGAGCAGATA	0.67	1.0948
ADCK5	203054	aarF domain containing kinase 5	Kinase Set	CTGGGAGATGCTCAAGTTTGA	0.05	1.30523
ADCK5	203054	aarF domain containing kinase 5	Kinase Set	AGGAGTTTGACTACCAGCCAA	2.88	1.16043
ADK	132	adenosine kinase	Kinase Set	CAAGGGAGAGATGACACTATA	0.28	1.11161
ADK	132	adenosine kinase	Kinase Set	TTGGATGCATTGGGATAGATA	0.66	1.08799
ADK	132	adenosine kinase	Kinase Set	AAGGGTATGGTAATGCTTGTA	0.32	1.39552
ADK	132	adenosine kinase	Kinase Set	TAGTTTGATAGTGCCACTTAA	0.76	1.19133
ADRBK1	156	adrenergic, beta, receptor kinase 1	Kinase Set	CCGGGAGATCTTCGACTCATA	0	1.03037
ADRBK1	156	adrenergic, beta, receptor kinase 1	Kinase Set	CGGCTGGAGGCTCGCAAGAAA	0	0.998678
ADRBK1	156	adrenergic, beta, receptor kinase 1	Kinase Set	CAGAGGGATGTCAACCGGAGA	-0.8	0.97514
ADRBK1	156	adrenergic, beta, receptor kinase 1	Kinase Set	CAGGCCCTTGGTGGAATTCTA	-0.66	1.05353
ADRBK2	157	adrenergic, beta, receptor kinase 2	Kinase Set	AAGATGTTCAGTGTTGGGTAA	-3.33	0.932502
ADRBK2	157	adrenergic, beta, receptor kinase 2	Kinase Set	AAGCTACTTGATTGCGACCAA	0.39	1.08557
ADRBK2	157	adrenergic, beta, receptor kinase 2	Kinase Set	TGGGATTAACTAATCATTGAA	0.45	1.06628
ADRBK2	157	adrenergic, beta, receptor kinase 2	Kinase Set	CAAGCTGTAGAACACGTACAA	0.46	0.880619
AK1	203	adenylate kinase 1	Kinase Set	CCGGGATGCCATGGTGGCCAA	1.78	1.15078
AK1	203	adenylate kinase 1	Kinase Set	GCGGCTGGAGACCTATTACAA	-0.26	0.883329
AK1	203	adenylate kinase 1	Kinase Set	CAGCGGGCGTGTGGACGACAA	0.41	0.925694
AK1	203	adenylate kinase 1	Kinase Set	CCGCGCGCTGACAGCCTTATA	-0.07	0.970052
AK2	204	adenylate kinase 2	Kinase Set	ATGGGTGGGAATGATAGGACA	0.6	1.18442
AK2	204	adenylate kinase 2	Kinase Set	ATGGGTGGGAATGATAGGACA	2.83	0.96482
AK2	204	adenylate kinase 2	Kinase Set	CCACATGTAAAGACTTGGTTA	-0.07	1.34404
AK2	204	adenylate kinase 2	Kinase Set	CCACATGTAAAGACTTGGTTA	-0.05	1.15621
AK2	204	adenylate kinase 2	Kinase Set	CTCATAGAGTACTACAGGAAA	1.2	1.21881
AK2	204	adenylate kinase 2	Kinase Set	CTCATAGAGTACTACAGGAAA	0.59	1.03605
AK2	204	adenylate kinase 2	Kinase Set	CTGCAAGCCTACCACACTCAA	-0.22	1.2417
AK2	204	adenylate kinase 2	Kinase Set	CTGCAAGCCTACCACACTCAA	0.05	1.18573
AK3	50808	adenylate kinase 3	Kinase Set	CCCGTGGCACTATGTAAATAA	2.57	0.940982
AK3	50808	adenylate kinase 3	Kinase Set	TTCAGTTATGACTCAGGTTAA	-0.08	0.903923
AK3	50808	adenylate kinase 3	Kinase Set	CGCCAGTGGCCGAGTCTATAA	-0.12	0.936233
AK3	50808	adenylate kinase 3	Kinase Set	GACGGTTATCAAGAGACTAAA	0.6	1.08219
AK3L1	205	adenylate kinase 3-like 1	Kinase Set	CAGGAAGATGTGGTCATTCAT	1.2	1.25506
AK3L1	205	adenylate kinase 3-like 1	Kinase Set	CCTGGTAACAGTGAAATTGAA	-0.23	1.0668
AK3L1	205	adenylate kinase 3-like 1	Kinase Set	TCCTAGCGGAAGGGTATATAA	-1.11	0.925343
AK3L1	205	adenylate kinase 3-like 1	Kinase Set	CAGGAGGATGATAAACCCGAA	0	1.01978
AK5	26289	adenylate kinase 5	Kinase Set	CAGCATGGCAGTTGACAACAA	-1.46	0.98538
AK5	26289	adenylate kinase 5	Kinase Set	TAGAGGCATCAAGCAAGTAAA	2.3	1.15925
AK5	26289	adenylate kinase 5	Kinase Set	CAGAGCTAGTCAGTACATGAA	0.14	0.963076
AK5	26289	adenylate kinase 5	Kinase Set	ATCAGGGTGATGACCAGTTAA	0	0.977099
AK7	122481	adenylate kinase 7	Kinase Set	GACGATCAATATATAATTAGA	0.32	0.95413
AK7	122481	adenylate kinase 7	Kinase Set	AAGGAGCGTGTGATAAACCTT	3.61	1.18222
AK7	122481	adenylate kinase 7	Kinase Set	GAGCCTCGAAATTATGGTTTA	0	1.07544
AK7	122481	adenylate kinase 7	Kinase Set	CCCGAGGATTCTGAGGTTCCA	-2.26	0.897863
AKAP1	8165	A kinase (PRKA) anchor protein 1	Kinase Set	AGCGCTGAACTTGATTGGGAA	-1.27	0.949524
AKAP1	8165	A kinase (PRKA) anchor protein 1	Kinase Set	AAGCACTTAGTCGGTCGGCTA	-0.05	0.897939
AKAP1	8165	A kinase (PRKA) anchor protein 1	Kinase Set	TGGGCTTGGCACTCAAGTCAA	-0.21	0.945605
AKAP1	8165	A kinase (PRKA) anchor protein 1	Kinase Set	CCCAGTGGAAATAACGGTCAT	0	0.973357
AKAP10	11216	A kinase (PRKA) anchor protein 10	Kinase Set	TAGCAGGACAGCCACACTTAA	0	1.06428
AKAP10	11216	A kinase (PRKA) anchor protein 10	Kinase Set	ATCAACCGTTAGAGAAATCTA	3.43	1.1556
AKAP10	11216	A kinase (PRKA) anchor protein 10	Kinase Set	CACACTCGTAGTGGTAACTCA	0	1.12105
AKAP10	11216	A kinase (PRKA) anchor protein 10	Kinase Set	ATCCATGTTCTCACAAGCTAT	0.93	1.07223
AKAP11	11215	A kinase (PRKA) anchor protein 11	Kinase Set	ACCGGTTATCTAAATCTATTA	0.25	1.06369
AKAP11	11215	A kinase (PRKA) anchor protein 11	Kinase Set	CAGTGGTGCATACGATAGTAA	-0.07	0.962083
AKAP11	11215	A kinase (PRKA) anchor protein 11	Kinase Set	CAGACGGTTACTGGTCATCAT	1.06	1.28489
AKAP11	11215	A kinase (PRKA) anchor protein 11	Kinase Set	CACCATACTAATACCCTATCA	0	0.75637
AKAP12	9590	A kinase (PRKA) anchor protein 12	Kinase Set	CAGAAAGACGAGATTGTGGAA	2.85	1.09014
AKAP12	9590	A kinase (PRKA) anchor protein 12	Kinase Set	CACGAAACAGCTGTTACCGTA	-0.62	0.784239
AKAP12	9590	A kinase (PRKA) anchor protein 12	Kinase Set	CCGGTTATCAGCTGAATATGA	0.52	1.00846
AKAP12	9590	A kinase (PRKA) anchor protein 12	Kinase Set	AAGTCACTAGTTGAACCGAAA	1.52	1.01239
AKAP13	11214	A kinase (PRKA) anchor protein 13	Kinase Set	CTCGGTGTTTCAGGCACTAAA	0.67	0.969059
AKAP13	11214	A kinase (PRKA) anchor protein 13	Kinase Set	GAGTCGGATAATAGACAGCAA	1.28	1.06389
AKAP13	11214	A kinase (PRKA) anchor protein 13	Kinase Set	ACGGAATCAGATAGTGGCCTA	0.17	1.02544
AKAP13	11214	A kinase (PRKA) anchor protein 13	Kinase Set	AAAGATGTGGTCAAACGGCAA	-0.26	0.923408
AKAP14	158798	A kinase (PRKA) anchor protein 14	Kinase Set	TACGAGGATGAATTGACTCAA	-0.21	1.06432
AKAP14	158798	A kinase (PRKA) anchor protein 14	Kinase Set	CACGGTGAATTCACTGTGGAA	-0.8	0.992869
AKAP14	158798	A kinase (PRKA) anchor protein 14	Kinase Set	CTGGTTGAGGATGTCATCAAT	0.25	1.02014
AKAP14	158798	A kinase (PRKA) anchor protein 14	Kinase Set	GAGGAGCGAAACCCTTTGAAA	0.5	1.04265
AKAP3	10566	A kinase (PRKA) anchor protein 3	Kinase Set	AGGGATCATGACCTATGCTAA	-0.34	0.964219
AKAP3	10566	A kinase (PRKA) anchor protein 3	Kinase Set	CCGGAACAGCCAGTTAAGGAA	-2.28	0.781269
AKAP3	10566	A kinase (PRKA) anchor protein 3	Kinase Set	GAGGAGGAGACTTGTGCGAAA	-1.76	0.822724
AKAP3	10566	A kinase (PRKA) anchor protein 3	Kinase Set	AGGAAGTGTTTGAATCTCGTA	-0.63	0.848007
AKAP4	8852	A kinase (PRKA) anchor protein 4	Kinase Set	TACAGTGTCTATGCCGATCAA	-0.25	0.956222
AKAP4	8852	A kinase (PRKA) anchor protein 4	Kinase Set	CAGCAAGATCAGGACCGGAAA	1.3	1.15546
AKAP4	8852	A kinase (PRKA) anchor protein 4	Kinase Set	AGCAAGCGAACGGGCAATTTA	0.09	1.29146
AKAP4	8852	A kinase (PRKA) anchor protein 4	Kinase Set	ATGGCTAAGTATAGCAACGAT	0.18	1.05815
AKAP5	9495	A kinase (PRKA) anchor protein 5	Kinase Set	TTCCTAGTCTTAAGTCTCTTA	0	1.04439
AKAP5	9495	A kinase (PRKA) anchor protein 5	Kinase Set	ATGATCTTACTTGGTCTACTA	-0.19	1.04057
AKAP5	9495	A kinase (PRKA) anchor protein 5	Kinase Set	CAGCAAGCAAGCCCACTTGAA	0.59	1.15761
AKAP5	9495	A kinase (PRKA) anchor protein 5	Kinase Set	AACGGGAACTCTAATCCTTGA	-0.14	1.06669
AKAP6	9472	A kinase (PRKA) anchor protein 6	Kinase Set	CACGTTTGTCACTGCCGTTTA	-1.58	0.92021
AKAP6	9472	A kinase (PRKA) anchor protein 6	Kinase Set	CAGAGAGGGTCCGAGACCTAA	-1.96	0.805506
AKAP6	9472	A kinase (PRKA) anchor protein 6	Kinase Set	ATGGATCGCATTTCATATAAA	0.4	0.961754
AKAP6	9472	A kinase (PRKA) anchor protein 6	Kinase Set	AAAGACGGAGCTGCTTAGTAA	-0.06	0.986677
AKAP7	9465	A kinase (PRKA) anchor protein 7	Kinase Set	AACGATGGGTCTGAAGTCCAA	0.17	0.927687
AKAP7	9465	A kinase (PRKA) anchor protein 7	Kinase Set	CCCGATGACGCTGAACTAGTA	-0.68	0.913167
AKAP7	9465	A kinase (PRKA) anchor protein 7	Kinase Set	CACTGGGTAAATTATACTACA	0	0.994627
AKAP7	9465	A kinase (PRKA) anchor protein 7	Kinase Set	TAGTGTCTGCACAACAGCAAA	0	0.959187
AKAP8	10270	A kinase (PRKA) anchor protein 8	Kinase Set	GAGGCCGGTAGTGATCCTCAA	1.39	1.17285
AKAP8	10270	A kinase (PRKA) anchor protein 8	Kinase Set	CAAGGTTAGCACGCAACAGAA	0.9	1.14216
AKAP8	10270	A kinase (PRKA) anchor protein 8	Kinase Set	CAGAAGTATCTGACCGACCTA	-0.71	0.985178
AKAP8	10270	A kinase (PRKA) anchor protein 8	Kinase Set	CTGGCCCGGGTTGACAGTGAA	-1.25	0.975145
AKAP8L	26993	A kinase (PRKA) anchor protein 8-like	Kinase Set	CCGCGTGGCCGAAGCTGGAAA	0	1.05509
AKAP8L	26993	A kinase (PRKA) anchor protein 8-like	Kinase Set	CACAGCCGACTTCCGAACCAA	-1.87	0.788229
AKAP8L	26993	A kinase (PRKA) anchor protein 8-like	Kinase Set	AAGGAACACTTTAAGTACGTA	2.59	1.29357
AKAP8L	26993	A kinase (PRKA) anchor protein 8-like	Kinase Set	TAGCTCTGACACAAATGCAAA	0.75	1.10153
AKAP9	10142	A kinase (PRKA) anchor protein (yotiao) 9	Kinase Set	CAGGTTCGTGAATATATGGAA	0.23	1.1109
AKAP9	10142	A kinase (PRKA) anchor protein (yotiao) 9	Kinase Set	CAGCTTCTATTTAGTCACGAA	2.52	1.15132
AKAP9	10142	A kinase (PRKA) anchor protein (yotiao) 9	Kinase Set	AGCCAGTTCGAAACTGATATA	0.72	1.13775
AKAP9	10142	A kinase (PRKA) anchor protein (yotiao) 9	Kinase Set	ATGAAGCACATAAGTCCCTTA	-0.99	1.00343
AKT1	207	v-akt murine thymoma viral oncogene homolog 1	Kinase Set	ACGCTACTTCCTCCTCAAGAA	1.09	1.05168
AKT1	207	v-akt murine thymoma viral oncogene homolog 1	Kinase Set	CACGCTTGGTCCCGAGGCCAA	-1.02	1.00629
AKT1	207	v-akt murine thymoma viral oncogene homolog 1	Kinase Set	CACCATGAGCGACGTGGCTAT	-1.01	0.901671
AKT1	207	v-akt murine thymoma viral oncogene homolog 1	Kinase Set	AAGTACTCTTTCCAGACCCAC	-0.93	1.04154
AKT2	208	v-akt murine thymoma viral oncogene homolog 2	Kinase Set	ACGGGCTAAAGTGACCATGAA	-0.48	1.12459
AKT2	208	v-akt murine thymoma viral oncogene homolog 2	Kinase Set	CAAGCGTGGTGAATACATCAA	0.15	1.09475
AKT2	208	v-akt murine thymoma viral oncogene homolog 2	Kinase Set	AACAACTTCTCCGTAGCAGAA	-0.34	1.02901
AKT2	208	v-akt murine thymoma viral oncogene homolog 2	Kinase Set	AAGGTACTTCGATGATGAATT	-1.22	0.914768
AKT3	10000	v-akt murine thymoma viral oncogene homolog 3 (protein kinase B, gamma)	Kinase Set	CTCCAGTGGACTACTGTTATA	-0.63	1.0395
AKT3	10000	v-akt murine thymoma viral oncogene homolog 3 (protein kinase B, gamma)	Kinase Set	AAGACATTAAATTTCCTCGAA	2.29	0.755266
AKT3	10000	v-akt murine thymoma viral oncogene homolog 3 (protein kinase B, gamma)	Kinase Set	ATGGCTCATTCATAGGATATA	1.49	1.10814
AKT3	10000	v-akt murine thymoma viral oncogene homolog 3 (protein kinase B, gamma)	Kinase Set	ATGAAGTGGCACACACTCTAA	1.8	1.03455
ALK	238	anaplastic lymphoma receptor tyrosine kinase	Kinase Set	CTGGGCCTGTATACCGGATAA	-0.58	0.923655
ALK	238	anaplastic lymphoma receptor tyrosine kinase	Kinase Set	CTCCTCGGTTCTAGGGCTAAA	-1.75	0.990405
ALK	238	anaplastic lymphoma receptor tyrosine kinase	Kinase Set	CACCTACGTATTTAAGATGAA	-1	1.10535
ALK	238	anaplastic lymphoma receptor tyrosine kinase	Kinase Set	CTCGACCATCATGACCGACTA	0.34	1.01228
ALPI	248	alkaline phosphatase, intestinal	Phosphatase Set	CACGTCCATCCTGTACGGCAA	0.83	1.051
ALPI	248	alkaline phosphatase, intestinal	Phosphatase Set	TCCATTCTCCTAGGAGACAAA	-0.25	0.826298
ALPI	248	alkaline phosphatase, intestinal	Phosphatase Set	CCAGACAATAAAGGGACCAAA	4.55	1.34266
ALPI	248	alkaline phosphatase, intestinal	Phosphatase Set	CCGGGCTACGTGTTCAACTCA	-0.79	0.876388
ALPK1	80216	alpha-kinase 1	Kinase Set	CCGCAGGTGGTTATTCGCCAA	-0.33	0.970205
ALPK1	80216	alpha-kinase 1	Kinase Set	ATGGGCCTCCATTGTAGGATA	0.05	1.05114
ALPK1	80216	alpha-kinase 1	Kinase Set	TTCCATGAGCAAGAACGATTA	-0.62	0.847586
ALPK1	80216	alpha-kinase 1	Kinase Set	AGAGATGTTGTGGTCGATTTA	-0.05	1.0173
ALPK2	115701	alpha-kinase 2	Kinase Set	CAGGATTTGCGACCAGGTTTA	0.36	1.10994
ALPK2	115701	alpha-kinase 2	Kinase Set	CGGCCTCATGCCTGTCTTCAA	0.12	1.03833
ALPK2	115701	alpha-kinase 2	Kinase Set	TCCATCGGCCTGAGAACAATA	1.24	1.44024
ALPK2	115701	alpha-kinase 2	Kinase Set	AACGCTGGCTAAAGGGTACAA	-2.18	0.830009
ALPK3	57538	alpha-kinase 3	Kinase Set	CCCGGCCACCGGCTATAAATA	-1.29	1.00169
ALPK3	57538	alpha-kinase 3	Kinase Set	ATGGAATGGTGGAGTACGGAA	-2.78	0.831894
ALPK3	57538	alpha-kinase 3	Kinase Set	TCGGTGCACCATCCACAATGA	-0.2	0.992475
ALPK3	57538	alpha-kinase 3	Kinase Set	CACCTGCATCGTCACAGGATA	-0.6	0.911782
ALPL	249	alkaline phosphatase, liver/bone/kidney	Phosphatase Set	CAGGATTGGAACATCAGTTAA	-0.07	1.04267
ALPL	249	alkaline phosphatase, liver/bone/kidney	Phosphatase Set	CCGGGACTGGTACTCAGACAA	-0.36	0.898261
ALPL	249	alkaline phosphatase, liver/bone/kidney	Phosphatase Set	CAGACTGCAGACATTCTCAAA	-0.41	1.05619
ALPL	249	alkaline phosphatase, liver/bone/kidney	Phosphatase Set	CACCATGATTTCACCATTCTT	-0.2	0.902501
ALPPL2	251	alkaline phosphatase, placental-like 2	Phosphatase Set	CTGGGAAACACAAAGCAATAA	-0.81	1.01856
ALPPL2	251	alkaline phosphatase, placental-like 2	Phosphatase Set	TTGCTTTATCTTGCTCTTGAA	1.07	0.873508
ALPPL2	251	alkaline phosphatase, placental-like 2	Phosphatase Set	ATCGACCATGGTCATCATGAA	-1.47	0.906675
ALPPL2	251	alkaline phosphatase, placental-like 2	Phosphatase Set	CACGGTCCTCCTATACGGAAA	5.07	1.10051
ANKK1	255239	ankyrin repeat and kinase domain containing 1	Kinase Set	AGGAGCCGAGATGGAAATTTA	1.74	1.13258
ANKK1	255239	ankyrin repeat and kinase domain containing 1	Kinase Set	GCGGACGGAGTACGCCATCAA	-2.62	1.02382
ANKK1	255239	ankyrin repeat and kinase domain containing 1	Kinase Set	CACCCGGATGCAGTACATCGA	-0.29	1.25621
ANKK1	255239	ankyrin repeat and kinase domain containing 1	Kinase Set	CAGGTTCCGCATCATCCATGA	-0.52	0.806157
ARAF	369	v-raf murine sarcoma 3611 viral oncogene homolog	Kinase Set	CCGGGATGGCATGAGTGTCTA	4.28	1.01308
ARAF	369	v-raf murine sarcoma 3611 viral oncogene homolog	Kinase Set	CCGACTCATCAAGGGACGAAA	-0.08	0.875572
ARAF	369	v-raf murine sarcoma 3611 viral oncogene homolog	Kinase Set	CCGGGCAGTGGGCACCGTCAA	-0.87	0.99929
ARAF	369	v-raf murine sarcoma 3611 viral oncogene homolog	Kinase Set	CAGGAAGACGCGACATGTCAA	-2.02	0.980888
ARHGAP26	23092	Rho GTPase activating protein 26	Kinase Set	AGGGAGTATACTAGTAGGTTA	0.04	1.19393
ARHGAP26	23092	Rho GTPase activating protein 26	Kinase Set	CTCCTTCCTATTAGCTACAAA	-0.18	0.970533
ARHGAP26	23092	Rho GTPase activating protein 26	Kinase Set	AACCGTATGGCCTATAGTTTA	1.03	1.20177
ARHGAP26	23092	Rho GTPase activating protein 26	Kinase Set	AAGGACGGGAAGTCACTCATA	-0.49	1.02385
ATM	472	ataxia telangiectasia mutated	Kinase Set	TTGGCTTATACGCGCAGTGTA	0.01	0.980981
ATM	472	ataxia telangiectasia mutated	Kinase Set	AAACTACTGACTCGTGTATTA	0.76	1.04031
ATM	472	ataxia telangiectasia mutated	Kinase Set	AGGGAAGGGCTTAGGTATCTA	0.22	1.1092
ATM	472	ataxia telangiectasia mutated	Kinase Set	CTCCTCGTATTTGGACCTTGA	0.33	0.929505
ATR	545	ataxia telangiectasia and Rad3 related	Kinase Set	AAGGACATGTGCATTACCTTA	0.21	1.01332
ATR	545	ataxia telangiectasia and Rad3 related	Kinase Set	CAGGCACTAATTGTTCTTCAA	1.98	1.12787
ATR	545	ataxia telangiectasia and Rad3 related	Kinase Set	GACCGGATACTTACAGATGTA	-0.24	0.900834
ATR	545	ataxia telangiectasia and Rad3 related	Kinase Set	TAGCCTATCCTCAACAAGCAA	0.95	1.09369
AURKA	6790	aurora kinase A	Kinase Set	CACCTTCGGCATCCTAATATT	1.87	1.18123
AURKA	6790	aurora kinase A	Kinase Set	CAGGGCTGCCATATAACCTGA	0	0.986641
AURKA	6790	aurora kinase A	Kinase Set	CACGTGCTCTACCTCCATTTA	0.4	1.15053
AURKA	6790	aurora kinase A	Kinase Set	TCCCAGCGCATTCCTTTGCAA	-0.1	1.09343
AURKAIP1	54998	aurora kinase A interacting protein 1	Kinase Set	CTGCTGTGATCCGTAGTAATA	1.98	1.10608
AURKAIP1	54998	aurora kinase A interacting protein 1	Kinase Set	AAGCAGATCAAGTTCGAGAAA	2.03	1.13162
AURKAIP1	54998	aurora kinase A interacting protein 1	Kinase Set	CCGGCGGAAGATGAACCACCA	-1.63	1.0207
AURKAIP1	54998	aurora kinase A interacting protein 1	Kinase Set	CTCAGAGGACTCAGCCTTTAA	-0.29	0.687063
AURKB	9212	aurora kinase B	Kinase Set	AACGCGGCACTTCACAATTGA	-1.66	0.843145
AURKB	9212	aurora kinase B	Kinase Set	CATCGTCAAGGTGGACCTAAA	-3.85	0.682194
AURKB	9212	aurora kinase B	Kinase Set	AGGCAAGTTTGGAAACGTGTA	0.25	1.06675
AURKB	9212	aurora kinase B	Kinase Set	AGGGCTCAAGGGAGAGCTGAA	0.61	1.02825
AURKC	6795	aurora kinase C	Kinase Set	CCGGGTGTACCTGATTCTGGA	0.14	0.973842
AURKC	6795	aurora kinase C	Kinase Set	AAGATGTAAGATGCTAATTAA	-1.44	0.848664
AURKC	6795	aurora kinase C	Kinase Set	AAGCTGAATCATTTCATACCA	-0.99	1.02798
AURKC	6795	aurora kinase C	Kinase Set	ACCTACTGCCATGACAAGAAA	0	0.960827
AXL	558	AXL receptor tyrosine kinase	Kinase Set	CACTGTAGTTCTAAGACTCAA	0.26	0.949864
AXL	558	AXL receptor tyrosine kinase	Kinase Set	ACGGGTCTGTGTCCAATCTGA	0.78	1.06894
AXL	558	AXL receptor tyrosine kinase	Kinase Set	AAGGTTCTAGGTTTCAAAGAT	0.68	0.966935
AXL	558	AXL receptor tyrosine kinase	Kinase Set	AAAGTCTCTAATTCTATTAAA	0.05	0.998417
BAIAP2L1	55971	BAI1-associated protein 2-like 1	Kinase Set	CTCAACGAGAGTCTTGATGAA	0.68	1.13733
BAIAP2L1	55971	BAI1-associated protein 2-like 1	Kinase Set	CACGGAGAGCACCTACCGGAA	2.31	1.09306
BAIAP2L1	55971	BAI1-associated protein 2-like 1	Kinase Set	AACGGGACTGAACATGATGAA	0.84	1.27388
BAIAP2L1	55971	BAI1-associated protein 2-like 1	Kinase Set	ACGTGAAATATATGAACGCAA	0.9	1.087
BCKDK	10295	branched chain ketoacid dehydrogenase kinase	Kinase Set	AACGCCCACCATGATGCTCTA	-0.7	0.80185
BCKDK	10295	branched chain ketoacid dehydrogenase kinase	Kinase Set	CACAATGGAGAGTCACCTAGA	-0.12	0.920123
BCKDK	10295	branched chain ketoacid dehydrogenase kinase	Kinase Set	ACGCCTGTGTGAGCACAAGTA	-1.23	0.987714
BCKDK	10295	branched chain ketoacid dehydrogenase kinase	Kinase Set	CTGACCTGTTATTAAAGTTCA	-0.34	0.911475
BCR	613	breakpoint cluster region	Kinase Set	ACGGCAGTCCATGACGGTGAA	0.41	0.906013
BCR	613	breakpoint cluster region	Kinase Set	CAGCATTCCGCTGACCATCAA	-0.11	0.957008
BCR	613	breakpoint cluster region	Kinase Set	AAGGTCAACGACAAAGAGGTG	0	0.994981
BCR	613	breakpoint cluster region	Kinase Set	CCGGGCCTTCGTGGACAACTA	0.14	1.0552
BEGAIN	57596	brain-enriched guanylate kinase-associated homolog (rat)	Kinase Set	CGGGCGGACCATGTCACCGTA	0.21	1.06084
BEGAIN	57596	brain-enriched guanylate kinase-associated homolog (rat)	Kinase Set	CTGCAGCTTCTCTGAACGCTA	2.03	1.20147
BEGAIN	57596	brain-enriched guanylate kinase-associated homolog (rat)	Kinase Set	CAGCGCCACGTCGGAGGAGAA	0.39	1.13541
BEGAIN	57596	brain-enriched guanylate kinase-associated homolog (rat)	Kinase Set	CCACGAGATTGTTGCCCTCAA	-1.84	0.728617
BLK	640	B lymphoid tyrosine kinase	Kinase Set	AAGGTGGTTCTTTAGATCACA	0.35	1.16332
BLK	640	B lymphoid tyrosine kinase	Kinase Set	CAGCCGTGCTGTTAAACCAAA	-0.71	0.969869
BLK	640	B lymphoid tyrosine kinase	Kinase Set	CTGGTAAGCGACTGTCATCAA	0.09	0.999803
BLK	640	B lymphoid tyrosine kinase	Kinase Set	CAACATGAAGGTGGCCATTAA	-3.67	0.824938
BMP2K	55589	BMP2 inducible kinase	Kinase Set	TCCGATGTGCATTGAAGCGAA	-1.32	0.807119
BMP2K	55589	BMP2 inducible kinase	Kinase Set	AGGCATCACCTGAATATCTTA	-1.65	0.939761
BMP2K	55589	BMP2 inducible kinase	Kinase Set	CAGCTCAGGTTGGAACCATAA	-0.94	0.975502
BMP2K	55589	BMP2 inducible kinase	Kinase Set	AAGGTTCATGCTTGAACCAGA	0.12	1.01447
BMPR1A	657	bone morphogenetic protein receptor, type IA	Kinase Set	CAGCTACGCCGGACAATAGAA	-0.85	1.06306
BMPR1A	657	bone morphogenetic protein receptor, type IA	Kinase Set	CAGAATCTGGATAGTATGCTT	0	1.08152
BMPR1A	657	bone morphogenetic protein receptor, type IA	Kinase Set	GTCAGAGCTGTTATAAATTTA	0.12	1.10254
BMPR1A	657	bone morphogenetic protein receptor, type IA	Kinase Set	CAAATATGTTCTGGACAGCTA	0	1.13627
BMPR1B	658	bone morphogenetic protein receptor, type IB	Kinase Set	ACGGATATTGTTTCACGATGA	0	1.04579
BMPR1B	658	bone morphogenetic protein receptor, type IB	Kinase Set	AACGAATGTAATAAAGACCTA	0	0.837169
BMPR1B	658	bone morphogenetic protein receptor, type IB	Kinase Set	CCAGTTGTACCTAATCACAGA	-1.1	0.912475
BMPR1B	658	bone morphogenetic protein receptor, type IB	Kinase Set	ACAGAAATCTTTAGTACTCAA	-1.61	0.896683
BMPR2	659	bone morphogenetic protein receptor, type II (serine/threonine kinase)	Kinase Set	AAGCACCGAAGCGAAACTTAA	-1.35	0.951011
BMPR2	659	bone morphogenetic protein receptor, type II (serine/threonine kinase)	Kinase Set	TCGCAGAATCAAGAACGGCTA	-0.93	0.907299
BMPR2	659	bone morphogenetic protein receptor, type II (serine/threonine kinase)	Kinase Set	AAGCTCTAAATTGATGTGCTA	-0.76	1.10383
BMPR2	659	bone morphogenetic protein receptor, type II (serine/threonine kinase)	Kinase Set	GTGGCCGAACTAATTCCAATA	0.3	1.11083
BMX	660	BMX non-receptor tyrosine kinase	Kinase Set	CCCAATATGACAACGAATCAA	0.08	0.964551
BMX	660	BMX non-receptor tyrosine kinase	Kinase Set	CGGAACAAAGTTTCCAGTCAA	0	0.918183
BMX	660	BMX non-receptor tyrosine kinase	Kinase Set	TGGGTTCTTCGTGGACGGGAA	1.05	0.96947
BMX	660	BMX non-receptor tyrosine kinase	Kinase Set	CCCATTTCAGATTGTCTATAA	-1.9	0.930721
BRAF	673	v-raf murine sarcoma viral oncogene homolog B1	Kinase Set	AACATATAGAGGCCCTATTGG	1.77	1.07764
BRAF	673	v-raf murine sarcoma viral oncogene homolog B1	Kinase Set	ACACGACATGTGAATATCCTA	-1.25	0.957817
BRAF	673	v-raf murine sarcoma viral oncogene homolog B1	Kinase Set	AAGCTAGATGCACTCCAACAA	0.45	0.988845
BRAF	673	v-raf murine sarcoma viral oncogene homolog B1	Kinase Set	CTGCATCAATGGATACCGTTA	2.31	1.11064
BRD3	8019	bromodomain containing 3	Kinase Set	AACCTGCCGGATTATCATAAA	-0.07	0.968157
BRD3	8019	bromodomain containing 3	Kinase Set	CAGCCCGTGGACGCAATCAAA	-0.15	1.10066
BRD3	8019	bromodomain containing 3	Kinase Set	ACGCCGCCTGTCGTCAAGAAA	-0.95	1.00269
BRD3	8019	bromodomain containing 3	Kinase Set	CAGCAAGAAGCCCGCCCGGAA	-2.12	0.814582
BRD4	23476	bromodomain containing 4	Kinase Set	TGGCGTTTCCACGGTACCAAA	-1.16	0.790208
BRD4	23476	bromodomain containing 4	Kinase Set	CCGGCCTGTGAAACCTCCAAA	-5.13	0.690061
BRD4	23476	bromodomain containing 4	Kinase Set	ATGGACTAGAAACTTCCCAAA	-1.01	1.02679
BRD4	23476	bromodomain containing 4	Kinase Set	AAGAGGACAAGTGCAAGCCTA	0	1.04337
BRSK1	84446	BR serine/threonine kinase 1	Kinase Set	GACGTCTACGAGAACAAGAAA	0	1.12723
BRSK1	84446	BR serine/threonine kinase 1	Kinase Set	ACAAATATTCCTCGTGCTAAA	-2.09	1.01011
BRSK1	84446	BR serine/threonine kinase 1	Kinase Set	CACGACCTTCTGTACGGATTT	-1.52	1.02447
BRSK1	84446	BR serine/threonine kinase 1	Kinase Set	AAGGCTCAGTCTGGAGCAAAT	0.37	0.876524
BRSK2	9024	BR serine/threonine kinase 2	Kinase Set	GCGAGCTACTGTAAACTTTAA	0.94	1.05917
BRSK2	9024	BR serine/threonine kinase 2	Kinase Set	CCCGACTGCCAGAGTCTGCTA	-0.66	0.938596
BRSK2	9024	BR serine/threonine kinase 2	Kinase Set	AACGAGCTTCCGGGCCGAGTA	0.2	0.998012
BRSK2	9024	BR serine/threonine kinase 2	Kinase Set	CAGCGAGTCGGTGCTGATGAA	-1.24	1.01686
BTK	695	Bruton agammaglobulinemia tyrosine kinase	Kinase Set	ACAGACTGAATTTGCGATGAA	-1.24	1.02853
BTK	695	Bruton agammaglobulinemia tyrosine kinase	Kinase Set	CAGCTCGAAACTGTTTGGTAA	-2.49	0.832158
BTK	695	Bruton agammaglobulinemia tyrosine kinase	Kinase Set	CCCTTTATGATTACATGCCAA	-0.8	1.12413
BTK	695	Bruton agammaglobulinemia tyrosine kinase	Kinase Set	CTGAAGCGATCCCAACAGAAA	0	1.02398
BUB1	699	budding uninhibited by benzimidazoles 1 homolog (yeast)	Kinase Set	CAGCTTGTGATAAAGAGTCAA	-4.82	0.835482
BUB1	699	budding uninhibited by benzimidazoles 1 homolog (yeast)	Kinase Set	TGGCACTTACATGAAAGTGAA	0.05	1.03871
BUB1	699	budding uninhibited by benzimidazoles 1 homolog (yeast)	Kinase Set	ATGGAACTACCAGATCGATTA	-0.62	1.04342
BUB1	699	budding uninhibited by benzimidazoles 1 homolog (yeast)	Kinase Set	AGGGCCCTACGTAATAGGCTA	-0.21	0.74339
BUB1B	701	budding uninhibited by benzimidazoles 1 homolog beta (yeast)	Kinase Set	CAGGTAGACCTGTTTGGTATA	0.63	1.00984
BUB1B	701	budding uninhibited by benzimidazoles 1 homolog beta (yeast)	Kinase Set	AAGGAGACAACTAAACTGCAA	-0.84	0.823211
BUB1B	701	budding uninhibited by benzimidazoles 1 homolog beta (yeast)	Kinase Set	CTGGATGTTTGGGATAGGTAT	-0.87	0.869986
BUB1B	701	budding uninhibited by benzimidazoles 1 homolog beta (yeast)	Kinase Set	AAGCTCGAGTGTCTCGGCAAA	-0.06	0.935077
C17orf75	64149	chromosome 17 open reading frame 75	Kinase Set	CAGGCTTGAATTGGACAAGTA	-0.33	0.890482
C17orf75	64149	chromosome 17 open reading frame 75	Kinase Set	TTGAGTTACACTCCTGTTGAA	3.34	1.23119
C17orf75	64149	chromosome 17 open reading frame 75	Kinase Set	AACTGTGGTAGTGGAGATATA	-1.88	1.14928
C17orf75	64149	chromosome 17 open reading frame 75	Kinase Set	AAAGGCCATACAAGACACAAA	2.73	1.13321
CABC1	56997	chaperone, ABC1 activity of bc1 complex homolog (S. pombe)	Kinase Set	CTGGCGGGACAAGTTGGAATA	-1.8	0.902053
CABC1	56997	chaperone, ABC1 activity of bc1 complex homolog (S. pombe)	Kinase Set	TTCCACGGTTTCTGTTGCTAA	1.31	0.992907
CABC1	56997	chaperone, ABC1 activity of bc1 complex homolog (S. pombe)	Kinase Set	TCGGAACGAGATCTGCTACAA	-1.24	1.07784
CABC1	56997	chaperone, ABC1 activity of bc1 complex homolog (S. pombe)	Kinase Set	ACAAGTCTTGTAATTATCGAA	-0.75	1.01454
CALM1	801	calmodulin 1 (phosphorylase kinase, delta)	Kinase Set	CGGCAACTTACACACATTGAA	0.01	1.06239
CALM1	801	calmodulin 1 (phosphorylase kinase, delta)	Kinase Set	ATGCCCGTGTATGTTGGTTTA	0.51	1.17823
CALM1	801	calmodulin 1 (phosphorylase kinase, delta)	Kinase Set	TACAGTTTACGTCCATTCCAA	0.79	1.14126
CALM1	801	calmodulin 1 (phosphorylase kinase, delta)	Kinase Set	CAGCAGAACTACGTCACGTCA	0.64	1.16
CALM2	805	calmodulin 2 (phosphorylase kinase, delta)	Kinase Set	ACAAAGGAATTGGGAACTGTA	0.84	1.06713
CALM2	805	calmodulin 2 (phosphorylase kinase, delta)	Kinase Set	AACGGGTGTATTATCCAGGTA	-0.24	0.957133
CALM2	805	calmodulin 2 (phosphorylase kinase, delta)	Kinase Set	TGGACTATGGACAGTCAACAA	-2.18	0.840681
CALM2	805	calmodulin 2 (phosphorylase kinase, delta)	Kinase Set	CAGCAAAGTGAAGACCTTGTA	1.36	1.07564
CALM3	808	calmodulin 3 (phosphorylase kinase, delta)	Kinase Set	CCGCAGAGCTGCGTCACGTAA	0.22	1.01586
CALM3	808	calmodulin 3 (phosphorylase kinase, delta)	Kinase Set	CACCAATTGATTGACTGAGAA	1.68	1.07752
CALM3	808	calmodulin 3 (phosphorylase kinase, delta)	Kinase Set	CCCGGTTCTAGCAAACACCAA	0.61	1.17787
CALM3	808	calmodulin 3 (phosphorylase kinase, delta)	Kinase Set	CAAGGCCTGATGCATTCATAA	-1.29	0.716877
CAMK1	8536	calcium/calmodulin-dependent protein kinase I	Kinase Set	CTGCATGACCTGGGCATTGTA	-2.19	0.802406
CAMK1	8536	calcium/calmodulin-dependent protein kinase I	Kinase Set	CAGGTGCTGGATGCTGTGAAA	1.27	1.05733
CAMK1	8536	calcium/calmodulin-dependent protein kinase I	Kinase Set	CAGCCTGGATGAAGACTCCAA	1.49	1.10902
CAMK1	8536	calcium/calmodulin-dependent protein kinase I	Kinase Set	CTCTTTGACCGTATTGTGGAA	0.68	1.01628
CAMK1D	57118	calcium/calmodulin-dependent protein kinase ID	Kinase Set	ATGGAGAAGGACCCGAATAAA	0.91	1.05067
CAMK1D	57118	calcium/calmodulin-dependent protein kinase ID	Kinase Set	TGCTGTGAAGTGTATCCCTAA	-0.15	1.05325
CAMK1D	57118	calcium/calmodulin-dependent protein kinase ID	Kinase Set	CCAGGCTATGTCGCTCCTGAA	0.44	0.969637
CAMK1D	57118	calcium/calmodulin-dependent protein kinase ID	Kinase Set	AGCCGTCCTGAGAAAGATTAA	2.17	1.12023
CAMK1G	57172	calcium/calmodulin-dependent protein kinase IG	Kinase Set	AACAGGCCGCCTGAAACTCAA	0.44	1.06108
CAMK1G	57172	calcium/calmodulin-dependent protein kinase IG	Kinase Set	CAGGTCTTGTCGGCAGTGAAA	0.19	0.855167
CAMK1G	57172	calcium/calmodulin-dependent protein kinase IG	Kinase Set	CCCAATGGAGTTAACCTTGGA	-0.4	0.808732
CAMK1G	57172	calcium/calmodulin-dependent protein kinase IG	Kinase Set	CATGCTCAGTGTTGTGCTTAA	0	1.01515
CAMK2A	815	calcium/calmodulin-dependent protein kinase II alpha	Kinase Set	CCAGGATTTCATCTCACCATA	1.33	0.890657
CAMK2A	815	calcium/calmodulin-dependent protein kinase II alpha	Kinase Set	CAGGAACTTCTCCGGAGGGAA	-0.88	0.833475
CAMK2A	815	calcium/calmodulin-dependent protein kinase II alpha	Kinase Set	CTGGACTTCCATCGATTCTAT	0	1.03644
CAMK2A	815	calcium/calmodulin-dependent protein kinase II alpha	Kinase Set	AAGTGCGGAAACAGGAAATTA	0.34	1.00868
CAMK2B	816	calcium/calmodulin-dependent protein kinase II beta	Kinase Set	CACGACCATCCTGAACCCACA	0.69	1.11009
CAMK2B	816	calcium/calmodulin-dependent protein kinase II beta	Kinase Set	CCCGGAAGCAGGAGATCATTA	-3.73	1.00131
CAMK2B	816	calcium/calmodulin-dependent protein kinase II beta	Kinase Set	CCGGCTCACGCAGTACATTGA	-2.42	1.16898
CAMK2B	816	calcium/calmodulin-dependent protein kinase II beta	Kinase Set	CACCGTCACTCCTGAAGCCAA	-0.06	0.984519
CAMK2D	817	calcium/calmodulin-dependent protein kinase II delta	Kinase Set	CCGCCTGCATAGCATATATTA	-1.24	0.957694
CAMK2D	817	calcium/calmodulin-dependent protein kinase II delta	Kinase Set	GTGCGACTTCATGATAGCATA	-0.62	0.906451
CAMK2D	817	calcium/calmodulin-dependent protein kinase II delta	Kinase Set	CACCAGGTTCACGGACGAGTA	0	1.15976
CAMK2D	817	calcium/calmodulin-dependent protein kinase II delta	Kinase Set	AAGCACGAAAGCAAGAGATTA	0.55	1.09821
CAMK2G	818	calcium/calmodulin-dependent protein kinase II gamma	Kinase Set	CTCGGATATGTCGACTTCTGA	2.03	1.02366
CAMK2G	818	calcium/calmodulin-dependent protein kinase II gamma	Kinase Set	CCGATGAGAAACCTCGTGTTA	-0.05	1.04337
CAMK2G	818	calcium/calmodulin-dependent protein kinase II gamma	Kinase Set	GAGGAAGAGATCTATACCCTA	0.7	1.04086
CAMK2G	818	calcium/calmodulin-dependent protein kinase II gamma	Kinase Set	CACGCAGGAGTACGCAGCAAA	1.7	1.03157
CAMK2N1	55450	calcium/calmodulin-dependent protein kinase II inhibitor 1	Kinase Set	AGCAAGCGGGTTGTTATTGAA	-0.78	0.997826
CAMK2N1	55450	calcium/calmodulin-dependent protein kinase II inhibitor 1	Kinase Set	TACCCACGATGAAATCAACAA	-4.17	0.783377
CAMK2N1	55450	calcium/calmodulin-dependent protein kinase II inhibitor 1	Kinase Set	CAAGCTATCTGCCCAAGTTAA	0	1.00958
CAMK2N1	55450	calcium/calmodulin-dependent protein kinase II inhibitor 1	Kinase Set	AAGGCACCTCCTGGTGTCTAA	0.11	0.895493
CAMK4	814	calcium/calmodulin-dependent protein kinase IV	Kinase Set	TTGCAAGTTAACACAACGTAA	-1.19	0.827863
CAMK4	814	calcium/calmodulin-dependent protein kinase IV	Kinase Set	CAGAAGCCTTATGCTCTCAAA	0.05	0.89326
CAMK4	814	calcium/calmodulin-dependent protein kinase IV	Kinase Set	CAGGGTACTGCGCACCTGAAA	1.39	1.09394
CAMK4	814	calcium/calmodulin-dependent protein kinase IV	Kinase Set	AAGGGATATTACAGTGAGCGA	1.9	1.04471
CAMKK1	84254	calcium/calmodulin-dependent protein kinase kinase 1, alpha	Kinase Set	CTGGCCTACAACGAAAGTGAA	-0.13	1.17091
CAMKK1	84254	calcium/calmodulin-dependent protein kinase kinase 1, alpha	Kinase Set	CACGTTGTACTGCTTTGTCTA	-0.93	0.969511
CAMKK1	84254	calcium/calmodulin-dependent protein kinase kinase 1, alpha	Kinase Set	GAGGAGGAGGTTAAGAACTCA	-0.16	1.20462
CAMKK1	84254	calcium/calmodulin-dependent protein kinase kinase 1, alpha	Kinase Set	CTGCGTGCAGCTGAACCAGTA	-3.3	0.850089
CAMKK2	10645	calcium/calmodulin-dependent protein kinase kinase 2, beta	Kinase Set	CCGCAAGATCTTCTCTGGGAA	3.18	0.956188
CAMKK2	10645	calcium/calmodulin-dependent protein kinase kinase 2, beta	Kinase Set	CTAGCTGATTGTTGTGGTCAA	0.12	0.941842
CAMKK2	10645	calcium/calmodulin-dependent protein kinase kinase 2, beta	Kinase Set	AGGCATCGAGTACTTACACTA	0	1.0141
CAMKK2	10645	calcium/calmodulin-dependent protein kinase kinase 2, beta	Kinase Set	TCAAGTTGGCCTACAATGAAA	0.71	0.95224
CAMKV	79012	CaM kinase-like vesicle-associated	Kinase Set	CTCGTGCTGCAAAGAGTGATA	0.13	1.11461
CAMKV	79012	CaM kinase-like vesicle-associated	Kinase Set	TCGGAGGTGACTGACAGATAT	0.05	1.06124
CAMKV	79012	CaM kinase-like vesicle-associated	Kinase Set	AAGGTAGGGCAGTATGTTTAA	0.83	1.15139
CAMKV	79012	CaM kinase-like vesicle-associated	Kinase Set	CTGCATGGCAATAACTCATAA	1.25	1.1451
CASK	8573	calcium/calmodulin-dependent serine protein kinase (MAGUK family)	Kinase Set	AAGGACGACAGATCTATGTAA	-0.02	0.842392
CASK	8573	calcium/calmodulin-dependent serine protein kinase (MAGUK family)	Kinase Set	AACCAATGGGAATCACTTTAA	2.05	0.983287
CASK	8573	calcium/calmodulin-dependent serine protein kinase (MAGUK family)	Kinase Set	CCGAATAGATAGGAGGAGAAA	0.98	1.11197
CASK	8573	calcium/calmodulin-dependent serine protein kinase (MAGUK family)	Kinase Set	CAGACCGGTTTGCGTACCCTA	-2.04	0.957796
CCRK	23552	cell cycle related kinase	Kinase Set	CCCGGGCAAGAACGATATTGA	-1.77	0.888813
CCRK	23552	cell cycle related kinase	Kinase Set	CTGCAGCGGGATGGACCAGTA	0.05	0.934512
CCRK	23552	cell cycle related kinase	Kinase Set	CGCCCACGGCATCGTCTTCAA	-0.95	0.954117
CCRK	23552	cell cycle related kinase	Kinase Set	CTACAACAAGATCTCCTTTAA	0.03	1.04376
CDC2	983	cell division cycle 2, G1 to S and G2 to M	Kinase Set	CTCTGGTACAGATCTCCAGAA	-0.37	1.00921
CDC2	983	cell division cycle 2, G1 to S and G2 to M	Kinase Set	TGGAATCTTTACAGGACTATA	0	0.96584
CDC2	983	cell division cycle 2, G1 to S and G2 to M	Kinase Set	TTGGGCACTCCCAATAATGAA	2.43	1.26072
CDC2	983	cell division cycle 2, G1 to S and G2 to M	Kinase Set	AAGCCTAGCATCCCATGTCAA	0.09	0.995245
CDC25A	993	cell division cycle 25A	Phosphatase Set	AAGGCGCTATTTGGCGCTTCA	0.07	1.09858
CDC25A	993	cell division cycle 25A	Phosphatase Set	AAGGGTTATCTCTTTCATACA	2.42	0.971231
CDC25A	993	cell division cycle 25A	Phosphatase Set	CAGCTTAGCTAGCATTACTAA	1.96	1.13204
CDC25A	993	cell division cycle 25A	Phosphatase Set	CTGGCCAAATAGCAAAGACAA	3.42	0.976221
CDC25B	994	cell division cycle 25B	Phosphatase Set	CAGGAGGCTGAGGAACCTAAA	-0.01	1.02838
CDC25B	994	cell division cycle 25B	Phosphatase Set	CCCAGTCTGTTGAGTTAGTTA	-0.57	0.986061
CDC25B	994	cell division cycle 25B	Phosphatase Set	CGCCGAGAGCTTCCTACTGAA	-3.32	1.04496
CDC25B	994	cell division cycle 25B	Phosphatase Set	TTGGGTTAATACCAGCTTAAA	-0.4	0.954497
CDC25C	995	cell division cycle 25C	Phosphatase Set	CAGGAAGGGCTTATGTTTAAA	5.29	1.15513
CDC25C	995	cell division cycle 25C	Phosphatase Set	CCAGAGCTATATATCCTTAAA	-2.76	0.940395
CDC25C	995	cell division cycle 25C	Phosphatase Set	CCAGGGAGCCTTAAACTTATA	-0.34	1.04795
CDC25C	995	cell division cycle 25C	Phosphatase Set	GAGCTGCAATCTAGTTAACTA	-0.94	0.905136
CDC2L1	984	cell division cycle 2-like 1 (PITSLRE proteins)	Kinase Set	CAAGATCTACATCGTGATGAA	-1.88	0.932207
CDC2L1	984	cell division cycle 2-like 1 (PITSLRE proteins)	Kinase Set	ATGGAGTGGTCTACAGAGCAA	-0.92	0.913917
CDC2L1	984	cell division cycle 2-like 1 (PITSLRE proteins)	Kinase Set	CAGGATCGAGGAGGGCACCTA	-0.67	1.15674
CDC2L1	984	cell division cycle 2-like 1 (PITSLRE proteins)	Kinase Set	CGGAAACGACATCGAGAAGAA	-0.28	0.99975
CDC2L5	8621	cell division cycle 2-like 5 (cholinesterase-related cell division controller)	Kinase Set	CGGCCGTATACTAACAAGGTA	-0.96	0.933428
CDC2L5	8621	cell division cycle 2-like 5 (cholinesterase-related cell division controller)	Kinase Set	TCGATTGTATAGCTCAGAAGA	-1.04	0.883015
CDC2L5	8621	cell division cycle 2-like 5 (cholinesterase-related cell division controller)	Kinase Set	CAGCCGGACTAAGTCGTCCAA	-0.2	0.969262
CDC2L5	8621	cell division cycle 2-like 5 (cholinesterase-related cell division controller)	Kinase Set	AAGCTGATAGCTTACGAGGAA	-2.88	1.01583
CDC2L6	23097	cell division cycle 2-like 6 (CDK8-like)	Kinase Set	CACTGTCGTCAGGAAGATATA	-0.85	0.98956
CDC2L6	23097	cell division cycle 2-like 6 (CDK8-like)	Kinase Set	GAGGATTTGTTTGAGTACGAA	0.68	1.05846
CDC2L6	23097	cell division cycle 2-like 6 (CDK8-like)	Kinase Set	CAGAGGGAACCTACAACCAAA	-1.51	1.18089
CDC2L6	23097	cell division cycle 2-like 6 (CDK8-like)	Kinase Set	TACGTTCGTATTTATCTAGTT	0	0.9935
CDC42BPA	8476	CDC42 binding protein kinase alpha (DMPK-like)	Kinase Set	CAGACTTTCCGTAGCAGCTTA	0.33	1.07926
CDC42BPA	8476	CDC42 binding protein kinase alpha (DMPK-like)	Kinase Set	ACGAGTGAACTTGATAAGCTT	0.99	1.03317
CDC42BPA	8476	CDC42 binding protein kinase alpha (DMPK-like)	Kinase Set	CCGCAATCATAGATCATGAAA	1.82	1.16568
CDC42BPA	8476	CDC42 binding protein kinase alpha (DMPK-like)	Kinase Set	CAGGGCCGAAGATCTAGACAA	0.41	1.03852
CDC42BPB	9578	CDC42 binding protein kinase beta (DMPK-like)	Kinase Set	TAGGACCTTAAGAGAATAGTA	-2.28	0.896139
CDC42BPB	9578	CDC42 binding protein kinase beta (DMPK-like)	Kinase Set	CGCCGAGATATTCCATGTATA	-1.05	0.786043
CDC42BPB	9578	CDC42 binding protein kinase beta (DMPK-like)	Kinase Set	CCCGTGATTAGTAGCCCGTAT	-3.71	0.851413
CDC42BPB	9578	CDC42 binding protein kinase beta (DMPK-like)	Kinase Set	TCCACGCTTGATCTACTTCAA	-0.05	0.971911
CDC42BPG	55561	CDC42 binding protein kinase gamma (DMPK-like)	Kinase Set	CGCCGGTGGCTTTGCACTCTA	-1.57	1.09012
CDC42BPG	55561	CDC42 binding protein kinase gamma (DMPK-like)	Kinase Set	CTCGCCGCCTACCAACTTCAA	-0.1	1.02891
CDC42BPG	55561	CDC42 binding protein kinase gamma (DMPK-like)	Kinase Set	CAGCTGGGTGAATGATGAGAA	0.27	1.14392
CDC42BPG	55561	CDC42 binding protein kinase gamma (DMPK-like)	Kinase Set	CGGCAAGATCATGAACCACGA	0	1.06088
CDC42SE2	56990	CDC42 small effector 2	Kinase Set	AAGGGAGGTTATGGAGGTGGA	0.36	1.01642
CDC42SE2	56990	CDC42 small effector 2	Kinase Set	CAGGAGACCTGTTCAGTGGAA	-0.32	0.935371
CDC42SE2	56990	CDC42 small effector 2	Kinase Set	TACCTTCGTCGTGGTTCAGAA	1.24	1.2507
CDC42SE2	56990	CDC42 small effector 2	Kinase Set	TACGGTATTAACCTTGGACAT	2.96	1.18685
CDK10	8558	cyclin-dependent kinase 10	Kinase Set	CTGATGCTGAGCGAAGCTATA	3.03	1.2205
CDK10	8558	cyclin-dependent kinase 10	Kinase Set	CCGGAAGCAGCCCTACAACAA	-0.41	0.915348
CDK10	8558	cyclin-dependent kinase 10	Kinase Set	TCCGAACATCGTGGAGCTGAA	0.29	1.2645
CDK10	8558	cyclin-dependent kinase 10	Kinase Set	CAACTTGCTCATGACCGACAA	0.05	1.18666
CDK2	1017	cyclin-dependent kinase 2	Kinase Set	CACGTACGGAGTTGTGTACAA	-2.42	0.907172
CDK2	1017	cyclin-dependent kinase 2	Kinase Set	GACGGAGCTTGTTATCGCAAA	0.38	0.788508
CDK2	1017	cyclin-dependent kinase 2	Kinase Set	AACTTGCCTTAAACACTCACC	-0.18	0.947496
CDK2	1017	cyclin-dependent kinase 2	Kinase Set	CACGTTAGATTTGCCGTACCA	-0.36	0.987273
CDK3	1018	cyclin-dependent kinase 3	Kinase Set	ATGGATATGTTCCAGAAGGTA	-2.08	0.856161
CDK3	1018	cyclin-dependent kinase 3	Kinase Set	CAGACTGGATTTGGAGATGGA	-2.61	0.809548
CDK3	1018	cyclin-dependent kinase 3	Kinase Set	CAGCCAGCGGATCACAGCCAA	-0.92	0.815419
CDK3	1018	cyclin-dependent kinase 3	Kinase Set	CAGCGATTCCGCCATTGAGAA	-2.43	0.784477
CDK4	1019	cyclin-dependent kinase 4	Kinase Set	AAGGTAATCCGGAGTGAGCAA	-0.36	0.893768
CDK4	1019	cyclin-dependent kinase 4	Kinase Set	AAGCCTCTCTTCTGTGGAAAC	0.1	1.05149
CDK4	1019	cyclin-dependent kinase 4	Kinase Set	AAGGTAACCCTGGTGTTTGAG	0.77	1.13891
CDK4	1019	cyclin-dependent kinase 4	Kinase Set	CCGAACTGACCGGGAGATCAA	-1.72	0.898124
CDK5	1020	cyclin-dependent kinase 5	Kinase Set	CCGGGAGATCTGCCTACTCAA	-2.99	0.811019
CDK5	1020	cyclin-dependent kinase 5	Kinase Set	CACCTACGGAACTGTGTTCAA	-0.24	0.978016
CDK5	1020	cyclin-dependent kinase 5	Kinase Set	AAGGGCTGGGATTCTGTCATA	0.02	0.991903
CDK5	1020	cyclin-dependent kinase 5	Kinase Set	CTGGTGAACGTCGTGCCCAAA	2.81	1.14907
CDK5R1	8851	cyclin-dependent kinase 5, regulatory subunit 1 (p35)	Kinase Set	CCGGAAGGCCACGCTGTTTGA	0.64	1.11052
CDK5R1	8851	cyclin-dependent kinase 5, regulatory subunit 1 (p35)	Kinase Set	CAGCCGGATCTTGGAGACAAT	0.02	1.07031
CDK5R1	8851	cyclin-dependent kinase 5, regulatory subunit 1 (p35)	Kinase Set	CTGGTCATCAGTATTGTGTAA	1.77	1.57125
CDK5R1	8851	cyclin-dependent kinase 5, regulatory subunit 1 (p35)	Kinase Set	CACATGCACTACTGAAATTTA	-0.01	1.13818
CDK5R2	8941	cyclin-dependent kinase 5, regulatory subunit 2 (p39)	Kinase Set	CCGCGAGAACCTTCTCCGCAA	-2.45	0.76374
CDK5R2	8941	cyclin-dependent kinase 5, regulatory subunit 2 (p39)	Kinase Set	CAGCAAGAAGGTGACACCCAA	-2.75	0.796837
CDK5R2	8941	cyclin-dependent kinase 5, regulatory subunit 2 (p39)	Kinase Set	CTGTCCCGGAAAGAACTATAA	-1.14	0.847538
CDK5R2	8941	cyclin-dependent kinase 5, regulatory subunit 2 (p39)	Kinase Set	GACTATGAACCTGGACCGCTA	-1.42	0.783591
CDK6	1021	cyclin-dependent kinase 6	Kinase Set	AAGACTCAAGGTGGTCAGTAA	-3.79	0.859477
CDK6	1021	cyclin-dependent kinase 6	Kinase Set	CTCAGGTATGGTATAGACATA	-1.71	0.906939
CDK6	1021	cyclin-dependent kinase 6	Kinase Set	CACGTAGAGTGCAAATTAGAA	-1.7	0.872336
CDK6	1021	cyclin-dependent kinase 6	Kinase Set	CAGATGAGTCTCAGTAATTCA	-1.15	0.948457
CDK7	1022	cyclin-dependent kinase 7	Kinase Set	TTGGACATAGATCAGAAGCTA	-0.89	1.07009
CDK7	1022	cyclin-dependent kinase 7	Kinase Set	AACCGCCTTAAGAGAGATAAA	1.16	1.07945
CDK7	1022	cyclin-dependent kinase 7	Kinase Set	GACGACTTACTAGATCTCATA	-0.08	1.18039
CDK7	1022	cyclin-dependent kinase 7	Kinase Set	CAGACCTTGATCAGCTAACAA	-2.37	0.675772
CDK8	1024	cyclin-dependent kinase 8	Kinase Set	TTCGAGAGCTTAAGCATCCAA	1.25	1.04361
CDK8	1024	cyclin-dependent kinase 8	Kinase Set	CAGGGCAATAACCACACTAAT	-0.91	0.994851
CDK8	1024	cyclin-dependent kinase 8	Kinase Set	CCAGCTGGACAGAATATTCAA	0.06	0.856634
CDK8	1024	cyclin-dependent kinase 8	Kinase Set	AACATGACCTCTGGCATATAA	0.8	1.04419
CDK9	1025	cyclin-dependent kinase 9	Kinase Set	TGGGCACAGTTTGGTCCGTTA	2.29	1.13135
CDK9	1025	cyclin-dependent kinase 9	Kinase Set	TAGGGACATGAAGGCTGCTAA	-6.12	0.949826
CDK9	1025	cyclin-dependent kinase 9	Kinase Set	AACCGCTGCAAGGGTAGTATA	-0.16	1.21127
CDK9	1025	cyclin-dependent kinase 9	Kinase Set	GACGTCCATGTTCGAGTACTT	0.03	1.06742
CDKL1	8814	cyclin-dependent kinase-like 1 (CDC2-related kinase)	Kinase Set	CTGGACCGAGTGACTACTATA	-5.11	0.84572
CDKL1	8814	cyclin-dependent kinase-like 1 (CDC2-related kinase)	Kinase Set	TCGGGAAATCCGAATGCTCAA	-5.71	0.82783
CDKL1	8814	cyclin-dependent kinase-like 1 (CDC2-related kinase)	Kinase Set	CAGCAAGTGTTTAGCACGAAT	-3.26	0.987159
CDKL1	8814	cyclin-dependent kinase-like 1 (CDC2-related kinase)	Kinase Set	CAGCTGTTGCATCACCCATAT	-2.25	0.688901
CDKL2	8999	cyclin-dependent kinase-like 2 (CDC2-related kinase)	Kinase Set	TTCTACGGACTTTAAATTAAA	1.95	1.07407
CDKL2	8999	cyclin-dependent kinase-like 2 (CDC2-related kinase)	Kinase Set	ATGATGTGTTTAGGTAATCTA	0.55	0.664641
CDKL2	8999	cyclin-dependent kinase-like 2 (CDC2-related kinase)	Kinase Set	CAGTCTGGCGTTGTCAAGCTA	-0.43	1.01589
CDKL2	8999	cyclin-dependent kinase-like 2 (CDC2-related kinase)	Kinase Set	AGGGTGCTTAACACTCCTCTA	1.07	0.906663
CDKL3	51265	cyclin-dependent kinase-like 3	Kinase Set	TGGGCAGATAGTGGCCATTAA	-1.31	0.774877
CDKL3	51265	cyclin-dependent kinase-like 3	Kinase Set	AGCTCCCGAATTAGTATTAAA	0.33	0.907387
CDKL3	51265	cyclin-dependent kinase-like 3	Kinase Set	CTAAAGCAATTTCATCACGAA	-0.81	1.01239
CDKL3	51265	cyclin-dependent kinase-like 3	Kinase Set	CAACATTATTGTCATGGACTA	0.4	1.06641
CDKL4	344387	cyclin-dependent kinase-like 4	Kinase Set	CTGAATCAAATCGTTACGCAA	-1.32	0.935674
CDKL4	344387	cyclin-dependent kinase-like 4	Kinase Set	CCACAAGATCGTATACCCATA	-1.06	1.0348
CDKL4	344387	cyclin-dependent kinase-like 4	Kinase Set	ACCGATTATGTAGCTACGAGA	0.69	1.22162
CDKL4	344387	cyclin-dependent kinase-like 4	Kinase Set	AAGCACGTAATGAAGGAAGAA	-0.66	0.889087
CDKL5	6792	cyclin-dependent kinase-like 5	Kinase Set	AAGATAGACGCTTCATGTTAA	0	0.98229
CDKL5	6792	cyclin-dependent kinase-like 5	Kinase Set	CAGCCTGGGTCTACCAGCAAA	0.26	0.970702
CDKL5	6792	cyclin-dependent kinase-like 5	Kinase Set	CCCAGGGACAAAGTACCTCAA	-0.75	0.896126
CDKL5	6792	cyclin-dependent kinase-like 5	Kinase Set	ATCAGCCACAATGATGTCCTA	-1.79	0.925909
CDKN1A	1026	cyclin-dependent kinase inhibitor 1A (p21, Cip1)	Kinase Set	AAGACCATGTGGACCTGTCAC	1.47	1.06897
CDKN1A	1026	cyclin-dependent kinase inhibitor 1A (p21, Cip1)	Kinase Set	AAGAAGGGCACCCTAGTTCTA	0.27	1.07353
CDKN1A	1026	cyclin-dependent kinase inhibitor 1A (p21, Cip1)	Kinase Set	CACAGGCGGTTATGAAATTCA	-0.36	1.1454
CDKN1A	1026	cyclin-dependent kinase inhibitor 1A (p21, Cip1)	Kinase Set	ACGCCGGCTGATCTTCTCCAA	7.45	1.50581
CDKN1B	1027	cyclin-dependent kinase inhibitor 1B (p27, Kip1)	Kinase Set	ACCGACGATTCTTCTACTCAA	0.33	0.997528
CDKN1B	1027	cyclin-dependent kinase inhibitor 1B (p27, Kip1)	Kinase Set	AAAGCGTTGGATGTAGCATTA	3.11	1.24547
CDKN1B	1027	cyclin-dependent kinase inhibitor 1B (p27, Kip1)	Kinase Set	CACGCATTTGGTGGACCCAAA	0.1	1.27999
CDKN1B	1027	cyclin-dependent kinase inhibitor 1B (p27, Kip1)	Kinase Set	CCGGTGGACCACGAAGAGTTA	-0.03	1.00752
CDKN1C	1028	cyclin-dependent kinase inhibitor 1C (p57, Kip2)	Kinase Set	CCGCGCCGTGTCCCTCTCCAA	-0.2	0.933501
CDKN1C	1028	cyclin-dependent kinase inhibitor 1C (p57, Kip2)	Kinase Set	TCGGCTGGGACCGTTCATGTA	0.19	1.02917
CDKN1C	1028	cyclin-dependent kinase inhibitor 1C (p57, Kip2)	Kinase Set	ACAGGCGAACCCGACGCAGAA	-1.31	1.04932
CDKN1C	1028	cyclin-dependent kinase inhibitor 1C (p57, Kip2)	Kinase Set	CGCCAACGGCGCGGCGATCAA	-0.02	1.06542
CDKN2A	1029	cyclin-dependent kinase inhibitor 2A (melanoma, p16, inhibits CDK4)	Kinase Set	CACGCCCTAAGCGCACATTCA	-0.77	1.02271
CDKN2A	1029	cyclin-dependent kinase inhibitor 2A (melanoma, p16, inhibits CDK4)	Kinase Set	CTCGGGAAACTTAGATCATCA	0.93	0.908156
CDKN2A	1029	cyclin-dependent kinase inhibitor 2A (melanoma, p16, inhibits CDK4)	Kinase Set	CCCGATTGAAAGAACCAGAGA	0.26	0.993673
CDKN2A	1029	cyclin-dependent kinase inhibitor 2A (melanoma, p16, inhibits CDK4)	Kinase Set	CTAGCAAATGGCAGAACCAAA	0.45	0.983099
CDKN2B	1030	cyclin-dependent kinase inhibitor 2B (p15, inhibits CDK4)	Kinase Set	GAGAGCAATTGTAACGGTTAA	-0.02	1.05816
CDKN2B	1030	cyclin-dependent kinase inhibitor 2B (p15, inhibits CDK4)	Kinase Set	CTGCTTACTTATGCCATAGAA	-0.23	0.80688
CDKN2B	1030	cyclin-dependent kinase inhibitor 2B (p15, inhibits CDK4)	Kinase Set	TAACTAGTGGCTCTCAGTTAA	0.09	1.10034
CDKN2B	1030	cyclin-dependent kinase inhibitor 2B (p15, inhibits CDK4)	Kinase Set	AGGGTGCAGAGGTCAGACTAA	0.94	1.03638
CDKN2C	1031	cyclin-dependent kinase inhibitor 2C (p18, inhibits CDK4)	Kinase Set	TTGCCTCTACTTTATCAATTA	0.78	0.912247
CDKN2C	1031	cyclin-dependent kinase inhibitor 2C (p18, inhibits CDK4)	Kinase Set	TACAGTTCTGTCATATGTTAA	3.04	1.13352
CDKN2C	1031	cyclin-dependent kinase inhibitor 2C (p18, inhibits CDK4)	Kinase Set	AACAGGCTTATGAATATATTT	0.73	1.05965
CDKN2C	1031	cyclin-dependent kinase inhibitor 2C (p18, inhibits CDK4)	Kinase Set	CTAACATGTAATTGCAGATAA	0.85	1.10191
CDKN2D	1032	cyclin-dependent kinase inhibitor 2D (p19, inhibits CDK4)	Kinase Set	ACCCAAGGGCAGAGCATTTAA	-1.28	0.859366
CDKN2D	1032	cyclin-dependent kinase inhibitor 2D (p19, inhibits CDK4)	Kinase Set	CGCCCTCAACCGCTTCGGCAA	1.19	1.15397
CDKN2D	1032	cyclin-dependent kinase inhibitor 2D (p19, inhibits CDK4)	Kinase Set	CACAGCCACCTAAACGGTTCA	0.24	0.983331
CDKN2D	1032	cyclin-dependent kinase inhibitor 2D (p19, inhibits CDK4)	Kinase Set	TCCCAAATCAATAAGAAGGTA	-0.01	1.12074
CDKN3	1033	cyclin-dependent kinase inhibitor 3 (CDK2-associated dual specificity phosphatase)	Phosphatase Set	CACAATCAAGATCTGTATCAA	-0.46	0.942701
CDKN3	1033	cyclin-dependent kinase inhibitor 3 (CDK2-associated dual specificity phosphatase)	Phosphatase Set	TCGGGACAAATTAGCTGCACA	2.58	1.17192
CDKN3	1033	cyclin-dependent kinase inhibitor 3 (CDK2-associated dual specificity phosphatase)	Phosphatase Set	CACCAGTGTTATCAACTTGAA	-0.24	1.06666
CDKN3	1033	cyclin-dependent kinase inhibitor 3 (CDK2-associated dual specificity phosphatase)	Phosphatase Set	CTAGCATAATTTGTATTGAAA	1.24	0.971614
CERK	64781	ceramide kinase	Kinase Set	ATGGCATTATTTGATCTGAAA	0.02	0.863788
CERK	64781	ceramide kinase	Kinase Set	AGCCGGCGTCCTGCTCACAAA	0.08	0.859969
CERK	64781	ceramide kinase	Kinase Set	AACGATGTCAACAGTGTAGTT	1.13	1.11472
CERK	64781	ceramide kinase	Kinase Set	ATGGACCTGATTCTAGTTTAT	0.15	1.12519
CERKL	375298	ceramide kinase-like	Kinase Set	CCGGCGGGTGATTCTAAGTAT	0.06	1.18878
CERKL	375298	ceramide kinase-like	Kinase Set	ACCTAGAGGCTTGGCACCTAA	-1.87	0.924174
CERKL	375298	ceramide kinase-like	Kinase Set	TCCATATTAGATTGCATCCAA	0.68	1.18292
CERKL	375298	ceramide kinase-like	Kinase Set	AAACGGCGTTGTTCTGTTAAA	0.91	1.0688
CHEK1	1111	CHK1 checkpoint homolog (S. pombe)	Kinase Set	TTGGAATAACTCACAGGGATA	2.13	1.13033
CHEK1	1111	CHK1 checkpoint homolog (S. pombe)	Kinase Set	AAGAAAGAGATCTGTATCAAT	3.53	1.24934
CHEK1	1111	CHK1 checkpoint homolog (S. pombe)	Kinase Set	CCCGCACAGGTCTTTCCTTAT	1.22	1.29922
CHEK1	1111	CHK1 checkpoint homolog (S. pombe)	Kinase Set	AACTGAAGAAGCAGTCGCAGT	0.59	0.882778
CHEK2	11200	CHK2 checkpoint homolog (S. pombe)	Kinase Set	ACGCCGTCCTTTGAATAACAA	0.33	0.994559
CHEK2	11200	CHK2 checkpoint homolog (S. pombe)	Kinase Set	CAGGATGGATTTGCCAATCTT	1.61	1.04671
CHEK2	11200	CHK2 checkpoint homolog (S. pombe)	Kinase Set	AAAGAACAGATAAATACCGAA	0.13	1.21342
CHEK2	11200	CHK2 checkpoint homolog (S. pombe)	Kinase Set	CTGACTGTAGATGATCAGTCA	0.29	1.03301
CHKA	1119	choline kinase alpha	Kinase Set	AGCCGGCGATTAGATACTGAA	2.68	1.22724
CHKA	1119	choline kinase alpha	Kinase Set	CCGGAAGTATCCCACCAAGAA	-0.69	0.763342
CHKA	1119	choline kinase alpha	Kinase Set	CACAGAGATTGTACTATACAA	-1.11	0.91966
CHKA	1119	choline kinase alpha	Kinase Set	CTGATGCTCATTGATTTCGAA	0.18	1.0299
CHKB	1120	choline kinase beta	Kinase Set	CTGGTAGAAGTCAGTCGGTAT	1.02	1.27419
CHKB	1120	choline kinase beta	Kinase Set	CACGAAGATGGCGCAATTTCA	0.67	1.10379
CHKB	1120	choline kinase beta	Kinase Set	GACCATGGAGCGGTACCTAAA	0.84	1.16391
CHKB	1120	choline kinase beta	Kinase Set	GTGAGTGGGTTTATGATTATA	2.54	1.23397
CHUK	1147	conserved helix-loop-helix ubiquitous kinase	Kinase Set	CAGGAGAAGTTCGGTTTAGTA	0.53	0.975964
CHUK	1147	conserved helix-loop-helix ubiquitous kinase	Kinase Set	AAGCAGAAGATTATTGATCTA	-1.14	0.882717
CHUK	1147	conserved helix-loop-helix ubiquitous kinase	Kinase Set	CAGTCTCGTATTGAGCGTGAA	0.29	1.20439
CHUK	1147	conserved helix-loop-helix ubiquitous kinase	Kinase Set	CGCCTAGAGCTAAGTACCAAA	-4.14	0.8447
CIB2	10518	calcium and integrin binding family member 2	Kinase Set	CACCGAAGAGCAGCTAGACAA	-0.6	1.08119
CIB2	10518	calcium and integrin binding family member 2	Kinase Set	CTGCACCTTCTTCAATAAGAA	-1.87	0.79226
CIB2	10518	calcium and integrin binding family member 2	Kinase Set	CAAGGCAAACTATGCCTTCAA	-2.06	0.854118
CIB2	10518	calcium and integrin binding family member 2	Kinase Set	CAACCTCGTCCCAATGGACTA	-0.25	0.85123
CIB3	117286	calcium and integrin binding family member 3	Kinase Set	CACGAGCAGCTGGAAGCGTAT	-2.26	0.967335
CIB3	117286	calcium and integrin binding family member 3	Kinase Set	CTGGAGCAGACGGTGACCAAA	0.7	1.08529
CIB3	117286	calcium and integrin binding family member 3	Kinase Set	CCGCGACCTCAAGGCTTACTA	-0.94	1.22152
CIB3	117286	calcium and integrin binding family member 3	Kinase Set	TGGCAGCATGCCCGAGCTGAA	-0.49	0.988391
CINP	51550	cyclin-dependent kinase 2-interacting protein	Kinase Set	GCGGCTGATTGGCACAATTTA	-1.11	0.989352
CINP	51550	cyclin-dependent kinase 2-interacting protein	Kinase Set	ACGGATATCTGTGGACCTTAT	0.23	1.12819
CINP	51550	cyclin-dependent kinase 2-interacting protein	Kinase Set	TTCGTGGGTGCTTCAGAGTAA	0	1.31193
CINP	51550	cyclin-dependent kinase 2-interacting protein	Kinase Set	TCGCGTCTCCTTCTACGGATA	2.46	1.11646
CIT	11113	citron (rho-interacting, serine/threonine kinase 21)	Kinase Set	ATGGAAGGCACTATTTCTCAA	-2.32	0.97162
CIT	11113	citron (rho-interacting, serine/threonine kinase 21)	Kinase Set	AGGAATTTAGTCGGCGTCTTA	0	0.882559
CIT	11113	citron (rho-interacting, serine/threonine kinase 21)	Kinase Set	CAGGATATACCGTAACACGAA	-1.73	0.887269
CIT	11113	citron (rho-interacting, serine/threonine kinase 21)	Kinase Set	AGCGGAACATATTATCTCGAA	0.08	0.986351
CKB	1152	creatine kinase, brain	Kinase Set	CCAGATTGAAACTCTCTTCAA	-2.01	0.969947
CKB	1152	creatine kinase, brain	Kinase Set	CCGGCCTCACCCAGATTGAAA	-9.76	0.735761
CKB	1152	creatine kinase, brain	Kinase Set	GCGGGCAGGTGTGCATATCAA	-1.68	0.836805
CKB	1152	creatine kinase, brain	Kinase Set	CCGCGGTATCTGGCACAATGA	0.61	1.02007
CKM	1158	creatine kinase, muscle	Kinase Set	GACCCTTGAACTCTACAAGAA	1.18	1.12724
CKM	1158	creatine kinase, muscle	Kinase Set	GACGGGCGAGTTCAAAGGGAA	-0.79	0.993901
CKM	1158	creatine kinase, muscle	Kinase Set	CGCCACCATGCCATTCGGTAA	1.14	1.22486
CKM	1158	creatine kinase, muscle	Kinase Set	CTGGGCTCGTCCGAAGTAGAA	-0.02	0.966729
CKMT1B	1159	creatine kinase, mitochondrial 1B	Kinase Set	CTGGACGTTACTATAGGCTCA	-0.37	1.0456
CKMT1B	1159	creatine kinase, mitochondrial 1B	Kinase Set	ACGGATCTAGATGCCAGTAAA	0.37	1.0256
CKMT1B	1159	creatine kinase, mitochondrial 1B	Kinase Set	AGAGGTATGTATTGTCCTCTA	-0.05	1.40211
CKMT1B	1159	creatine kinase, mitochondrial 1B	Kinase Set	CTCGTGGAATTTGGCACAACA	1.39	1.12751
CKMT2	1160	creatine kinase, mitochondrial 2 (sarcomeric)	Kinase Set	CACCAGGGTAATCTCAATGGA	0.14	1.07837
CKMT2	1160	creatine kinase, mitochondrial 2 (sarcomeric)	Kinase Set	TACGACAGACATAAATCTCTA	-0.48	0.815252
CKMT2	1160	creatine kinase, mitochondrial 2 (sarcomeric)	Kinase Set	CTGGATAAATGAGGAGGATCA	-2.93	0.809214
CKMT2	1160	creatine kinase, mitochondrial 2 (sarcomeric)	Kinase Set	TCCTGCCTATCTTTACAATAA	-0.47	1.00171
CKS1B	1163	CDC28 protein kinase regulatory subunit 1B	Kinase Set	AACATCTTTCTGATAACATTA	-3.68	0.874818
CKS1B	1163	CDC28 protein kinase regulatory subunit 1B	Kinase Set	AGGGATGGGTCCATTATATGA	0	1.00778
CKS1B	1163	CDC28 protein kinase regulatory subunit 1B	Kinase Set	AAAGCCTTGATTAAAGAGGAA	-0.21	1.02959
CKS1B	1163	CDC28 protein kinase regulatory subunit 1B	Kinase Set	CCCACTACCCAAGAAACCAAA	0	0.837309
CKS2	1164	CDC28 protein kinase regulatory subunit 2	Kinase Set	TAGGTTACTGTAAGATGTTTA	1.95	1.02021
CKS2	1164	CDC28 protein kinase regulatory subunit 2	Kinase Set	CTCAGTTAAATGCAACTGCAA	0.38	1.13396
CKS2	1164	CDC28 protein kinase regulatory subunit 2	Kinase Set	TCGGACAAGTACTTCGACGAA	-0.47	0.962697
CKS2	1164	CDC28 protein kinase regulatory subunit 2	Kinase Set	CGCCACGAGGATGGCCCACAA	1.27	1.1422
CLK1	1195	CDC-like kinase 1	Kinase Set	AAAGCCGGTATCAGAACCATA	-0.37	0.904602
CLK1	1195	CDC-like kinase 1	Kinase Set	AACGTGATGAACGCACCTTAA	-0.06	1.02015
CLK1	1195	CDC-like kinase 1	Kinase Set	CACGATAGTAAGGAGCATTTA	-3.04	0.721744
CLK1	1195	CDC-like kinase 1	Kinase Set	GAGAAAGATTATCATAGTCGA	1.92	0.992207
CLK2	1196	CDC-like kinase 2	Kinase Set	CAGCTACAGACGCAACGATTA	-0.96	0.998082
CLK2	1196	CDC-like kinase 2	Kinase Set	TCGCCTGGATTGGGATGAGAA	0.68	0.845909
CLK2	1196	CDC-like kinase 2	Kinase Set	AAGAGCGATATGAAATCGTTA	0.5	0.999147
CLK2	1196	CDC-like kinase 2	Kinase Set	TTGTACAGTCTTTGTGAAATA	3.74	1.14133
CLK3	1198	CDC-like kinase 3	Kinase Set	CTGCATTCTCTTTGAGTACTA	0.63	0.973194
CLK3	1198	CDC-like kinase 3	Kinase Set	CACGAAGATCTCGGTCCAGAA	0	0.957668
CLK3	1198	CDC-like kinase 3	Kinase Set	CTGCAAACCTCTGAAGAGTTA	1.06	1.14189
CLK3	1198	CDC-like kinase 3	Kinase Set	ACCCAAGCTATTTATATGTTA	-0.02	1.0443
CLK4	57396	CDC-like kinase 4	Kinase Set	AAGTCTGACTATGTAGTCAAA	-0.28	1.07345
CLK4	57396	CDC-like kinase 4	Kinase Set	CACGTTCGAAGAGCCACCGAA	0.08	0.870955
CLK4	57396	CDC-like kinase 4	Kinase Set	CCGGAGATACGTTGACGAATA	0	0.991196
CLK4	57396	CDC-like kinase 4	Kinase Set	CTGATTGGGATAGCAGAGAAA	-3.51	0.858973
CMPK1	51727	cytidine monophosphate (UMP-CMP) kinase 1, cytosolic	Kinase Set	AAGGCTAATTCTAAACCTGAA	-1.3	0.932935
CMPK1	51727	cytidine monophosphate (UMP-CMP) kinase 1, cytosolic	Kinase Set	TCCGAGGTTCTTAATATGAGA	0.7	1.10124
CMPK1	51727	cytidine monophosphate (UMP-CMP) kinase 1, cytosolic	Kinase Set	AAGTATTGCTAAGTACTATAA	-1.06	1.11537
CMPK1	51727	cytidine monophosphate (UMP-CMP) kinase 1, cytosolic	Kinase Set	CAGCTCTAGTATGAAGCAAGA	0.16	1.17462
CNKSR1	10256	connector enhancer of kinase suppressor of Ras 1	Kinase Set	CAGGGTGGCGTGTCCCTCCTA	-0.35	1.05685
CNKSR1	10256	connector enhancer of kinase suppressor of Ras 1	Kinase Set	ACCCATGACTTCCAGAGCATA	1.81	0.883639
CNKSR1	10256	connector enhancer of kinase suppressor of Ras 1	Kinase Set	CGGACTCAGCTTAGTGCTGAA	-0.42	0.96666
CNKSR1	10256	connector enhancer of kinase suppressor of Ras 1	Kinase Set	CTGTTGGTCGGAAGAAATCAA	-0.1	0.991672
CNKSR3	154043	CNKSR family member 3	Kinase Set	CCGGAGTTGTGTTACTGCTTA	-0.87	0.897914
CNKSR3	154043	CNKSR family member 3	Kinase Set	CCACCGGGTCTTTCAACTTTA	2.51	1.21318
CNKSR3	154043	CNKSR family member 3	Kinase Set	CAGCGCCACGATTCCATTCCA	-0.1	1.27492
CNKSR3	154043	CNKSR family member 3	Kinase Set	CAGGTGCTACATCAACTCAGA	0.99	1.07622
CRKRS	51755	Cdc2-related kinase, arginine/serine-rich	Kinase Set	AACGGCGACGTCAGCGACAAA	-0.16	0.891421
CRKRS	51755	Cdc2-related kinase, arginine/serine-rich	Kinase Set	AACGACGAACGTCGTGGATCA	-1.33	0.978385
CRKRS	51755	Cdc2-related kinase, arginine/serine-rich	Kinase Set	CCGCTTGGTATCGAAGCACAA	0	0.883328
CRKRS	51755	Cdc2-related kinase, arginine/serine-rich	Kinase Set	GACGGTCGTCCAGCTACGAAA	0.05	1.05157
CSK	1445	c-src tyrosine kinase	Kinase Set	TACGCGCCTCATTAAACCAAA	-0.92	0.854796
CSK	1445	c-src tyrosine kinase	Kinase Set	CCGGTACAGAATGTATTGCCA	0.07	0.900903
CSK	1445	c-src tyrosine kinase	Kinase Set	AAGTACAACTTCCACGGCACT	-0.91	0.764824
CSK	1445	c-src tyrosine kinase	Kinase Set	AGGGAACAAAGTCGCCGTCAA	-2.62	0.813806
CSNK1A1	1452	casein kinase 1, alpha 1	Kinase Set	CAAGAGTAACATGAAAGGTTT	-0.14	0.873709
CSNK1A1	1452	casein kinase 1, alpha 1	Kinase Set	AGGGCTAAAGGCTGCAACAAA	0.58	0.930479
CSNK1A1	1452	casein kinase 1, alpha 1	Kinase Set	CAGCCTGGTAACCGCCGAGAA	0.45	0.939382
CSNK1A1	1452	casein kinase 1, alpha 1	Kinase Set	TGCCGGGAGCCTATTGTGTAA	0.26	0.938771
CSNK1A1L	122011	casein kinase 1, alpha 1-like	Kinase Set	CTGCTTACCTGTGAAGACATA	0	1.05645
CSNK1A1L	122011	casein kinase 1, alpha 1-like	Kinase Set	ATGCACTGGTATGGTCAGGAA	-2.52	0.953588
CSNK1A1L	122011	casein kinase 1, alpha 1-like	Kinase Set	GTGGCTGTGAACAACCATTTA	0.03	1.0646
CSNK1A1L	122011	casein kinase 1, alpha 1-like	Kinase Set	CCCAAAGTGTAGCCTCTGTAA	-0.27	0.733244
CSNK1D	1453	casein kinase 1, delta	Kinase Set	CTCCCTGACGATTCCACTGTA	-0.35	0.926578
CSNK1D	1453	casein kinase 1, delta	Kinase Set	CCGGTCTAGGATCGAAATGTT	-1.41	0.700107
CSNK1D	1453	casein kinase 1, delta	Kinase Set	CGCATCGAATACATTCATTCA	-3.67	0.892759
CSNK1D	1453	casein kinase 1, delta	Kinase Set	AACACGCACCTTGGAATTGAA	-0.01	0.933986
CSNK1E	1454	casein kinase 1, epsilon	Kinase Set	TCCCTCCGAATTCTCAACATA	-1.47	1.00964
CSNK1E	1454	casein kinase 1, epsilon	Kinase Set	CGGGTCCTTCGGAGATATCTA	-1.3	0.84021
CSNK1E	1454	casein kinase 1, epsilon	Kinase Set	CGGGAGCGGCGAGAACACGAA	-2.38	0.916861
CSNK1E	1454	casein kinase 1, epsilon	Kinase Set	CCCGTTCTCCTGTGTCTACTA	-0.05	1.0844
CSNK1G1	53944	casein kinase 1, gamma 1	Kinase Set	ATGGACCATCCTAGTAGGGAA	0.02	0.81597
CSNK1G1	53944	casein kinase 1, gamma 1	Kinase Set	TTGGACCATGTGGGAAATATA	1.72	0.94449
CSNK1G1	53944	casein kinase 1, gamma 1	Kinase Set	GACGGTGTTAATGATAGCCAT	0.27	1.1172
CSNK1G1	53944	casein kinase 1, gamma 1	Kinase Set	AACTTCCTGATTGGTCGACAA	0.64	1.07824
CSNK1G2	1455	casein kinase 1, gamma 2	Kinase Set	AAGAATCTCTATACAAATGAA	0.16	1.09319
CSNK1G2	1455	casein kinase 1, gamma 2	Kinase Set	CAGTGGCTTCGTGTTCGACTA	1.26	0.992734
CSNK1G2	1455	casein kinase 1, gamma 2	Kinase Set	GGCCAGGGTATCACAAACTTA	-0.38	1.24667
CSNK1G2	1455	casein kinase 1, gamma 2	Kinase Set	ACCGGCCGCAGTGATGTTCTA	0.02	1.12506
CSNK1G3	1456	casein kinase 1, gamma 3	Kinase Set	ACCCAGCAAGTTATTCACATT	0	1.03351
CSNK1G3	1456	casein kinase 1, gamma 3	Kinase Set	AACCAGACTATGACTACTTAA	-2.35	0.779212
CSNK1G3	1456	casein kinase 1, gamma 3	Kinase Set	TACTGACTTGTTTGATCGAAA	-0.67	1.05894
CSNK1G3	1456	casein kinase 1, gamma 3	Kinase Set	ACAGTTCTCATGATAGCTATA	-0.93	0.80933
CSNK2A1	1457	casein kinase 2, alpha 1 polypeptide	Kinase Set	CAGAGCCACTATCTCCATTGA	1	1.12479
CSNK2A1	1457	casein kinase 2, alpha 1 polypeptide	Kinase Set	TTACATCACTTTACTCCATAA	-0.05	1.06293
CSNK2A1	1457	casein kinase 2, alpha 1 polypeptide	Kinase Set	CTGATCTAACCCTAAATCCAA	2.16	1.32631
CSNK2A1	1457	casein kinase 2, alpha 1 polypeptide	Kinase Set	CTCCTCAGTCTTGTAAATGTA	0.48	0.830072
CSNK2A1	1457	casein kinase 2, alpha 1 polypeptide	Kinase Set	CAGAGCCACTATCTCCATTGA	0.18	1.21115
CSNK2A1	1457	casein kinase 2, alpha 1 polypeptide	Kinase Set	CAGAGCCACTATCTCCATTGA	4.17	0.964565
CSNK2A1	1457	casein kinase 2, alpha 1 polypeptide	Kinase Set	CAGAGCCACTATCTCCATTGA	-0.11	0.962067
CSNK2A1	1457	casein kinase 2, alpha 1 polypeptide	Kinase Set	CAGAGCCACTATCTCCATTGA	0.11	0.802141
CSNK2A1	1457	casein kinase 2, alpha 1 polypeptide	Kinase Set	CAGAGCCACTATCTCCATTGA	0	0.888493
CSNK2A1	1457	casein kinase 2, alpha 1 polypeptide	Kinase Set	CAGAGCCACTATCTCCATTGA	-0.44	0.726816
CSNK2A1	1457	casein kinase 2, alpha 1 polypeptide	Kinase Set	CAGAGCCACTATCTCCATTGA	-2.39	0.89066
CSNK2A1	1457	casein kinase 2, alpha 1 polypeptide	Kinase Set	CAGAGCCACTATCTCCATTGA	-0.11	0.951985
CSNK2A1	1457	casein kinase 2, alpha 1 polypeptide	Kinase Set	CAGAGCCACTATCTCCATTGA	-1.43	0.839207
CSNK2A1	1457	casein kinase 2, alpha 1 polypeptide	Kinase Set	CAGAGCCACTATCTCCATTGA	0.95	0.912552
CSNK2A1	1457	casein kinase 2, alpha 1 polypeptide	Kinase Set	CAGAGCCACTATCTCCATTGA	-0.58	0.676256
CSNK2A1	1457	casein kinase 2, alpha 1 polypeptide	Kinase Set	CAGAGCCACTATCTCCATTGA	2.89	0.959807
CSNK2A1	1457	casein kinase 2, alpha 1 polypeptide	Kinase Set	CAGAGCCACTATCTCCATTGA	-1.01	0.854443
CSNK2A1	1457	casein kinase 2, alpha 1 polypeptide	Kinase Set	CAGAGCCACTATCTCCATTGA	-0.48	0.890641
CSNK2A1	1457	casein kinase 2, alpha 1 polypeptide	Kinase Set	CAGAGCCACTATCTCCATTGA	-2.06	0.677678
CSNK2A1	1457	casein kinase 2, alpha 1 polypeptide	Kinase Set	CAGAGCCACTATCTCCATTGA	0.26	0.808536
CSNK2A1	1457	casein kinase 2, alpha 1 polypeptide	Kinase Set	CAGAGCCACTATCTCCATTGA	-0.67	0.689433
CSNK2A1	1457	casein kinase 2, alpha 1 polypeptide	Kinase Set	CAGAGCCACTATCTCCATTGA	1.52	0.81093
CSNK2A1	1457	casein kinase 2, alpha 1 polypeptide	Kinase Set	CAGAGCCACTATCTCCATTGA	0.57	0.94168
CSNK2A1	1457	casein kinase 2, alpha 1 polypeptide	Kinase Set	CAGAGCCACTATCTCCATTGA	-0.87	0.718983
CSNK2A1	1457	casein kinase 2, alpha 1 polypeptide	Kinase Set	CAGAGCCACTATCTCCATTGA	-5.46	0.854904
CSNK2A1	1457	casein kinase 2, alpha 1 polypeptide	Kinase Set	CAGAGCCACTATCTCCATTGA	0	0.753771
CSNK2A1	1457	casein kinase 2, alpha 1 polypeptide	Kinase Set	CAGAGCCACTATCTCCATTGA	-1.11	1.06189
CSNK2A1	1457	casein kinase 2, alpha 1 polypeptide	Kinase Set	CAGAGCCACTATCTCCATTGA	0.31	1.19437
CSNK2A1	1457	casein kinase 2, alpha 1 polypeptide	Kinase Set	CAGAGCCACTATCTCCATTGA	0.09	0.795518
CSNK2A1	1457	casein kinase 2, alpha 1 polypeptide	Kinase Set	CAGAGCCACTATCTCCATTGA	0.37	1.08823
CSNK2A1	1457	casein kinase 2, alpha 1 polypeptide	Kinase Set	CAGAGCCACTATCTCCATTGA	-0.71	0.843461
CSNK2A1	1457	casein kinase 2, alpha 1 polypeptide	Kinase Set	CAGAGCCACTATCTCCATTGA	1.32	1.09334
CSNK2A1	1457	casein kinase 2, alpha 1 polypeptide	Kinase Set	CAGAGCCACTATCTCCATTGA	-0.23	0.954552
CSNK2A1	1457	casein kinase 2, alpha 1 polypeptide	Kinase Set	CAGAGCCACTATCTCCATTGA	0.23	0.857997
CSNK2A1	1457	casein kinase 2, alpha 1 polypeptide	Kinase Set	CAGAGCCACTATCTCCATTGA	-1.57	1.08354
CSNK2A1	1457	casein kinase 2, alpha 1 polypeptide	Kinase Set	CAGAGCCACTATCTCCATTGA	-0.48	0.833698
CSNK2A1	1457	casein kinase 2, alpha 1 polypeptide	Kinase Set	CAGAGCCACTATCTCCATTGA	-2.1	0.811973
CSNK2A1	1457	casein kinase 2, alpha 1 polypeptide	Kinase Set	CAGAGCCACTATCTCCATTGA	-0.29	0.946892
CSNK2A1	1457	casein kinase 2, alpha 1 polypeptide	Kinase Set	CAGAGCCACTATCTCCATTGA	0	0.906509
CSNK2A1	1457	casein kinase 2, alpha 1 polypeptide	Kinase Set	CAGAGCCACTATCTCCATTGA	0.4	0.944406
CSNK2A1	1457	casein kinase 2, alpha 1 polypeptide	Kinase Set	CAGAGCCACTATCTCCATTGA	-0.38	0.88504
CSNK2A1	1457	casein kinase 2, alpha 1 polypeptide	Kinase Set	CAGAGCCACTATCTCCATTGA	2.34	0.750907
CSNK2A1	1457	casein kinase 2, alpha 1 polypeptide	Kinase Set	CAGAGCCACTATCTCCATTGA	-1.14	0.868779
CSNK2A1	1457	casein kinase 2, alpha 1 polypeptide	Kinase Set	CAGAGCCACTATCTCCATTGA	0.31	0.890245
CSNK2A1	1457	casein kinase 2, alpha 1 polypeptide	Kinase Set	CAGAGCCACTATCTCCATTGA	-0.36	0.839862
CSNK2A1	1457	casein kinase 2, alpha 1 polypeptide	Kinase Set	CAGAGCCACTATCTCCATTGA	0.01	0.860641
CSNK2A1	1457	casein kinase 2, alpha 1 polypeptide	Kinase Set	CAGAGCCACTATCTCCATTGA	-1.19	0.86704
CSNK2A1	1457	casein kinase 2, alpha 1 polypeptide	Kinase Set	CAGAGCCACTATCTCCATTGA	3.56	0.934795
CSNK2A1	1457	casein kinase 2, alpha 1 polypeptide	Kinase Set	CAGAGCCACTATCTCCATTGA	-0.26	0.931104
CSNK2A1	1457	casein kinase 2, alpha 1 polypeptide	Kinase Set	CAGAGCCACTATCTCCATTGA	-0.47	0.927064
CSNK2A1	1457	casein kinase 2, alpha 1 polypeptide	Kinase Set	CAGAGCCACTATCTCCATTGA	0.52	0.796536
CSNK2A1	1457	casein kinase 2, alpha 1 polypeptide	Kinase Set	CAGAGCCACTATCTCCATTGA	1.73	0.783073
CSNK2A1	1457	casein kinase 2, alpha 1 polypeptide	Kinase Set	CAGAGCCACTATCTCCATTGA	-0.33	1.54783
CSNK2A1	1457	casein kinase 2, alpha 1 polypeptide	Kinase Set	CAGAGCCACTATCTCCATTGA	2.59	1.04912
CSNK2A1	1457	casein kinase 2, alpha 1 polypeptide	Kinase Set	CAGAGCCACTATCTCCATTGA	-0.22	1.01638
CSNK2A1	1457	casein kinase 2, alpha 1 polypeptide	Kinase Set	CAGAGCCACTATCTCCATTGA	0.94	1.03689
CSNK2A1	1457	casein kinase 2, alpha 1 polypeptide	Kinase Set	CAGAGCCACTATCTCCATTGA	-3.69	1.19272
CSNK2A1	1457	casein kinase 2, alpha 1 polypeptide	Kinase Set	CAGAGCCACTATCTCCATTGA	1.23	0.953662
CSNK2A1	1457	casein kinase 2, alpha 1 polypeptide	Kinase Set	CAGAGCCACTATCTCCATTGA	-0.78	0.990492
CSNK2A1	1457	casein kinase 2, alpha 1 polypeptide	Kinase Set	CAGAGCCACTATCTCCATTGA	1.05	1.12502
CSNK2A1	1457	casein kinase 2, alpha 1 polypeptide	Kinase Set	CAGAGCCACTATCTCCATTGA	0	1.14415
CSNK2A1	1457	casein kinase 2, alpha 1 polypeptide	Kinase Set	CAGAGCCACTATCTCCATTGA	0.81	0.996442
CSNK2A1	1457	casein kinase 2, alpha 1 polypeptide	Kinase Set	CAGAGCCACTATCTCCATTGA	-1.59	1.03238
CSNK2A1	1457	casein kinase 2, alpha 1 polypeptide	Kinase Set	CAGAGCCACTATCTCCATTGA	0.29	1.14387
CSNK2A1	1457	casein kinase 2, alpha 1 polypeptide	Kinase Set	CAGAGCCACTATCTCCATTGA	0	1.00778
CSNK2A1	1457	casein kinase 2, alpha 1 polypeptide	Kinase Set	CAGAGCCACTATCTCCATTGA	0.24	1.0436
CSNK2A1	1457	casein kinase 2, alpha 1 polypeptide	Kinase Set	CAGAGCCACTATCTCCATTGA	0	0.769784
CSNK2A1	1457	casein kinase 2, alpha 1 polypeptide	Kinase Set	CAGAGCCACTATCTCCATTGA	1.06	0.945735
CSNK2A1	1457	casein kinase 2, alpha 1 polypeptide	Kinase Set	CAGAGCCACTATCTCCATTGA	-0.2	0.733059
CSNK2A1	1457	casein kinase 2, alpha 1 polypeptide	Kinase Set	CAGAGCCACTATCTCCATTGA	0	0.897285
CSNK2A1	1457	casein kinase 2, alpha 1 polypeptide	Kinase Set	CAGAGCCACTATCTCCATTGA	-1.98	1.22272
CSNK2A1	1457	casein kinase 2, alpha 1 polypeptide	Kinase Set	CAGAGCCACTATCTCCATTGA	0.31	0.928249
CSNK2A1	1457	casein kinase 2, alpha 1 polypeptide	Kinase Set	CAGAGCCACTATCTCCATTGA	-0.14	0.950768
CSNK2A1	1457	casein kinase 2, alpha 1 polypeptide	Kinase Set	CAGAGCCACTATCTCCATTGA	0.14	0.934012
CSNK2A1	1457	casein kinase 2, alpha 1 polypeptide	Kinase Set	CAGAGCCACTATCTCCATTGA	0	1.01089
CSNK2A1	1457	casein kinase 2, alpha 1 polypeptide	Kinase Set	CAGAGCCACTATCTCCATTGA	2.23	1.25
CSNK2A1	1457	casein kinase 2, alpha 1 polypeptide	Kinase Set	CAGAGCCACTATCTCCATTGA	-0.08	0.953216
CSNK2A1	1457	casein kinase 2, alpha 1 polypeptide	Kinase Set	CAGAGCCACTATCTCCATTGA	0.74	1.19821
CSNK2A1	1457	casein kinase 2, alpha 1 polypeptide	Kinase Set	CAGAGCCACTATCTCCATTGA	-0.68	1.12375
CSNK2A1	1457	casein kinase 2, alpha 1 polypeptide	Kinase Set	CAGAGCCACTATCTCCATTGA	0.68	1.41922
CSNK2A1	1457	casein kinase 2, alpha 1 polypeptide	Kinase Set	CAGAGCCACTATCTCCATTGA	0	1.02144
CSNK2A1	1457	casein kinase 2, alpha 1 polypeptide	Kinase Set	CAGAGCCACTATCTCCATTGA	0.19	0.965236
CSNK2A1	1457	casein kinase 2, alpha 1 polypeptide	Kinase Set	CAGAGCCACTATCTCCATTGA	-1.5	1.15777
CSNK2A1	1457	casein kinase 2, alpha 1 polypeptide	Kinase Set	CAGAGCCACTATCTCCATTGA	0.16	1.08685
CSNK2A1	1457	casein kinase 2, alpha 1 polypeptide	Kinase Set	CAGAGCCACTATCTCCATTGA	-0.96	0.914942
CSNK2A1	1457	casein kinase 2, alpha 1 polypeptide	Kinase Set	CAGAGCCACTATCTCCATTGA	1.26	1.20219
CSNK2A1	1457	casein kinase 2, alpha 1 polypeptide	Kinase Set	CAGAGCCACTATCTCCATTGA	-1.21	1.00118
CSNK2A1	1457	casein kinase 2, alpha 1 polypeptide	Kinase Set	CAGAGCCACTATCTCCATTGA	1.21	1.14645
CSNK2A1	1457	casein kinase 2, alpha 1 polypeptide	Kinase Set	CAGAGCCACTATCTCCATTGA	-0.79	1.02902
CSNK2A1	1457	casein kinase 2, alpha 1 polypeptide	Kinase Set	CAGAGCCACTATCTCCATTGA	2.29	0.844697
CSNK2A1	1457	casein kinase 2, alpha 1 polypeptide	Kinase Set	CAGAGCCACTATCTCCATTGA	-1.29	0.916113
CSNK2A1	1457	casein kinase 2, alpha 1 polypeptide	Kinase Set	CAGAGCCACTATCTCCATTGA	0.61	0.987258
CSNK2A1	1457	casein kinase 2, alpha 1 polypeptide	Kinase Set	CAGAGCCACTATCTCCATTGA	-1.94	0.94502
CSNK2A1	1457	casein kinase 2, alpha 1 polypeptide	Kinase Set	CAGAGCCACTATCTCCATTGA	0.23	0.94503
CSNK2A1	1457	casein kinase 2, alpha 1 polypeptide	Kinase Set	CAGAGCCACTATCTCCATTGA	0.07	1.24972
CSNK2A1	1457	casein kinase 2, alpha 1 polypeptide	Kinase Set	CAGAGCCACTATCTCCATTGA	1.2	1.17214
CSNK2A1	1457	casein kinase 2, alpha 1 polypeptide	Kinase Set	CAGAGCCACTATCTCCATTGA	-1.23	1.03379
CSNK2A1	1457	casein kinase 2, alpha 1 polypeptide	Kinase Set	CAGAGCCACTATCTCCATTGA	1.14	0.989416
CSNK2A1	1457	casein kinase 2, alpha 1 polypeptide	Kinase Set	CAGAGCCACTATCTCCATTGA	-2.3	0.862738
CSNK2A1	1457	casein kinase 2, alpha 1 polypeptide	Kinase Set	CAGAGCCACTATCTCCATTGA	0.67	0.853822
CSNK2A2	1459	casein kinase 2, alpha prime polypeptide	Kinase Set	CAGGAGTACAATGTTCGTGTA	0	1.09803
CSNK2A2	1459	casein kinase 2, alpha prime polypeptide	Kinase Set	CTGGGACAACATTCACGGAAA	1.4	0.954566
CSNK2A2	1459	casein kinase 2, alpha prime polypeptide	Kinase Set	AACCTTCGTGGTGGAACAAAT	0.33	1.01116
CSNK2A2	1459	casein kinase 2, alpha prime polypeptide	Kinase Set	TAGATCCACACTTCAACGATA	-0.02	0.972909
CSNK2B	1460	casein kinase 2, beta polypeptide	Kinase Set	CAGGTCCCTCACTACCGACAA	0.75	0.830207
CSNK2B	1460	casein kinase 2, beta polypeptide	Kinase Set	CGCCCGCTACATCCTTACCAA	0.38	1.03085
CSNK2B	1460	casein kinase 2, beta polypeptide	Kinase Set	CGGGTCATCCTGGGATTGGTA	0	1.13928
CSNK2B	1460	casein kinase 2, beta polypeptide	Kinase Set	CAGGACAAATTTAATCTTACT	1.55	1.1453
CTDP1	9150	CTD (carboxy-terminal domain, RNA polymerase II, polypeptide A) phosphatase, subunit 1	Phosphatase Set	CCGGCTGTACGCACACACCAT	2.35	1.28643
CTDP1	9150	CTD (carboxy-terminal domain, RNA polymerase II, polypeptide A) phosphatase, subunit 1	Phosphatase Set	CTCCATGGTTTGCATTATTGA	1.8	1.33978
CTDP1	9150	CTD (carboxy-terminal domain, RNA polymerase II, polypeptide A) phosphatase, subunit 1	Phosphatase Set	CCCGACAAACTTCCCGATAGA	0	1.12245
CTDP1	9150	CTD (carboxy-terminal domain, RNA polymerase II, polypeptide A) phosphatase, subunit 1	Phosphatase Set	CCGAATATTATCAAGGGATGA	0	0.870837
CTDSP2	10106	CTD (carboxy-terminal domain, RNA polymerase II, polypeptide A) small phosphatase 2	Phosphatase Set	CCCGGAAACAGCGGGAAGTAA	1.02	1.30526
CTDSP2	10106	CTD (carboxy-terminal domain, RNA polymerase II, polypeptide A) small phosphatase 2	Phosphatase Set	TACGATCAGCGTGACAGAGTA	-0.19	1.26239
CTDSP2	10106	CTD (carboxy-terminal domain, RNA polymerase II, polypeptide A) small phosphatase 2	Phosphatase Set	CCACCTAGCCATAGTCTCAAA	1.87	1.22302
CTDSP2	10106	CTD (carboxy-terminal domain, RNA polymerase II, polypeptide A) small phosphatase 2	Phosphatase Set	CTGCGTATAAGGAGGAAGCAA	0	0.909512
CTDSPL	10217	CTD (carboxy-terminal domain, RNA polymerase II, polypeptide A) small phosphatase-like	Phosphatase Set	CCAGTGCAACGTCAGCTTAAA	1.24	1.31198
CTDSPL	10217	CTD (carboxy-terminal domain, RNA polymerase II, polypeptide A) small phosphatase-like	Phosphatase Set	TACGCCCAACTCTTTAGCCAA	0.57	1.21906
CTDSPL	10217	CTD (carboxy-terminal domain, RNA polymerase II, polypeptide A) small phosphatase-like	Phosphatase Set	TAGGAAATGCTACATGCGGAA	0	1.07395
CTDSPL	10217	CTD (carboxy-terminal domain, RNA polymerase II, polypeptide A) small phosphatase-like	Phosphatase Set	TTCGTTTAAGCCTATTAGTAA	-0.14	0.895615
DAPK1	1612	death-associated protein kinase 1	Kinase Set	CGGCTATTACTCTGTGGCCAA	0.23	1.15771
DAPK1	1612	death-associated protein kinase 1	Kinase Set	TAGAAGGTTGACACAGTTGTA	1.01	1.0892
DAPK1	1612	death-associated protein kinase 1	Kinase Set	TCCAACTATGATGTTAACCAA	2.03	1.37739
DAPK1	1612	death-associated protein kinase 1	Kinase Set	CACGTCGATACCTTGAAATTT	0.38	1.25192
DAPK2	23604	death-associated protein kinase 2	Kinase Set	CTGGTTAAAGAGACCCGGAAA	-5.24	0.840142
DAPK2	23604	death-associated protein kinase 2	Kinase Set	CGGAATTTGTTGCTCCAGAAA	0.48	1.08498
DAPK2	23604	death-associated protein kinase 2	Kinase Set	ACGCCGGTGGACAACCAGCAA	1.18	1.36367
DAPK2	23604	death-associated protein kinase 2	Kinase Set	AACCCTTGGTACCACAGAATA	1.5	0.941353
DAPK3	1613	death-associated protein kinase 3	Kinase Set	CTCCAGCTTGCCGCCCAACAA	0.36	1.08211
DAPK3	1613	death-associated protein kinase 3	Kinase Set	CCCAGAGATTGTGAACTATGA	5.87	1.30682
DAPK3	1613	death-associated protein kinase 3	Kinase Set	CCAGTTTGCGATCGTGCGGAA	0.72	1.21055
DAPK3	1613	death-associated protein kinase 3	Kinase Set	CACCAACATCTCAGCCGTGAA	0.18	0.782118
DBF4	10926	DBF4 homolog (S. cerevisiae)	Kinase Set	CAGTATCAAGTTGTTGATGAT	0.35	0.901469
DBF4	10926	DBF4 homolog (S. cerevisiae)	Kinase Set	CAGGTTAAACTAAGAATCCAA	1.54	1.12508
DBF4	10926	DBF4 homolog (S. cerevisiae)	Kinase Set	AAGAGTTGTATTTACTCAAGA	-0.97	0.94849
DBF4	10926	DBF4 homolog (S. cerevisiae)	Kinase Set	CTGGTGGACCATGCTAGTATT	-0.71	0.952884
DCK	1633	deoxycytidine kinase	Kinase Set	CTCCAGAGACATGCTTACATA	-0.03	1.08227
DCK	1633	deoxycytidine kinase	Kinase Set	TGGACTCATCTTAGTTCTGTA	0.46	1.10561
DCK	1633	deoxycytidine kinase	Kinase Set	AGGCAGCCTGCTATAAAGTTA	0.81	1.21228
DCK	1633	deoxycytidine kinase	Kinase Set	CAGTATCAGCATAGTGACTAA	-0.91	0.976461
DCLK1	9201	doublecortin-like kinase 1	Kinase Set	CCGGAAGTGATAACACGCAAA	0.02	1.07703
DCLK1	9201	doublecortin-like kinase 1	Kinase Set	CAGGTTTATAACTTCGACACA	-0.52	0.936916
DCLK1	9201	doublecortin-like kinase 1	Kinase Set	CAGAACGATATAAAGTCGGAA	0.59	1.04395
DCLK1	9201	doublecortin-like kinase 1	Kinase Set	CAGTGGAATGTGACCAGTCAA	0	1.1347
DCLK2	166614	doublecortin-like kinase 2	Kinase Set	CTGAGCTTGACCGTTGCATAA	-2.29	0.868635
DCLK2	166614	doublecortin-like kinase 2	Kinase Set	CCGCACTATCTACACCATCGA	-0.14	0.940805
DCLK2	166614	doublecortin-like kinase 2	Kinase Set	ACCATTTCGTAAAGTCGATTA	0.21	1.27671
DCLK2	166614	doublecortin-like kinase 2	Kinase Set	CTCGGTGTACCGCGGGACAAA	0.82	1.1622
DCLK3	85443	doublecortin-like kinase 3	Kinase Set	CAGGCAGGCCTATGCGATGAA	-3.71	0.905366
DCLK3	85443	doublecortin-like kinase 3	Kinase Set	CAGGGTCGTGACCGTAGTGAA	-0.46	1.0103
DCLK3	85443	doublecortin-like kinase 3	Kinase Set	CTCGAGAATCACAGAGCGGAA	1.92	1.30513
DCLK3	85443	doublecortin-like kinase 3	Kinase Set	GAGGAAACTGTTTAACCTCAA	0.13	1.02992
DDR1	780	discoidin domain receptor tyrosine kinase 1	Kinase Set	ACGGTGTGAATCACACATCCA	2.38	1.24549
DDR1	780	discoidin domain receptor tyrosine kinase 1	Kinase Set	CAGGAATGATTTCCTGAAAGA	0.98	1.1339
DDR1	780	discoidin domain receptor tyrosine kinase 1	Kinase Set	CCGGAGCTACCGGCTGCGTTA	0.41	1.13713
DDR1	780	discoidin domain receptor tyrosine kinase 1	Kinase Set	CAAGATCTGGTTAGTCTTGAT	0.33	1.0626
DDR2	4921	discoidin domain receptor tyrosine kinase 2	Kinase Set	ACGCACTGTCAGTTACACCAA	1.17	1.00249
DDR2	4921	discoidin domain receptor tyrosine kinase 2	Kinase Set	ACGAAACTGTTTAGTGGGTAA	-1.09	0.695213
DDR2	4921	discoidin domain receptor tyrosine kinase 2	Kinase Set	CCGGTTCATTCCAGTCACCGA	-1.42	0.768573
DDR2	4921	discoidin domain receptor tyrosine kinase 2	Kinase Set	CCGAGATCTGGCCACACGAAA	0.62	0.916595
DGKA	1606	diacylglycerol kinase, alpha 80kDa	Kinase Set	CACGACCAGTGTGCCATGAAA	-1.09	0.865649
DGKA	1606	diacylglycerol kinase, alpha 80kDa	Kinase Set	ATCCATCTTCTCAACATGCAA	-1.31	0.814395
DGKA	1606	diacylglycerol kinase, alpha 80kDa	Kinase Set	TACAATCAAGATCACCCACAA	-0.27	0.933498
DGKA	1606	diacylglycerol kinase, alpha 80kDa	Kinase Set	AAGGACATTGGTGTCCAATCA	2.37	1.03321
DGKB	1607	diacylglycerol kinase, beta 90kDa	Kinase Set	CTCATTCTAGTCCAATGGTAA	2.12	1.06138
DGKB	1607	diacylglycerol kinase, beta 90kDa	Kinase Set	AGCCATCGACGAATAGAGAAA	-2	1.0434
DGKB	1607	diacylglycerol kinase, beta 90kDa	Kinase Set	ATGGACCAATGCCAGGGTTAA	2.02	1.39843
DGKB	1607	diacylglycerol kinase, beta 90kDa	Kinase Set	CCCGGACTACTTCTCCTGCAA	-1.44	0.983789
DGKD	8527	diacylglycerol kinase, delta 130kDa	Kinase Set	CCGCCTCGTGACCAAGTTTAA	-0.01	0.998932
DGKD	8527	diacylglycerol kinase, delta 130kDa	Kinase Set	CAGCAGATTCTCTTCTATGAA	-0.64	1.01844
DGKD	8527	diacylglycerol kinase, delta 130kDa	Kinase Set	CCCACTGTTGGTCTTCGTCAA	-0.8	1.01243
DGKD	8527	diacylglycerol kinase, delta 130kDa	Kinase Set	CAGGTGGAGCGTCATGGCATA	1.99	1.14979
DGKE	8526	diacylglycerol kinase, epsilon 64kDa	Kinase Set	CTGGGAACAGGCAACGATCTA	2.83	1.12046
DGKE	8526	diacylglycerol kinase, epsilon 64kDa	Kinase Set	TTCGAATAGGACAGGCACATA	0	1.10732
DGKE	8526	diacylglycerol kinase, epsilon 64kDa	Kinase Set	ATCCATTAATCAGATGCGTAA	3.43	1.42325
DGKE	8526	diacylglycerol kinase, epsilon 64kDa	Kinase Set	CTAGATCGATGGAAAGTTCAA	0.15	0.711149
DGKG	1608	diacylglycerol kinase, gamma 90kDa	Kinase Set	TAGCCACTCACATAAAGTTTA	0	1.02824
DGKG	1608	diacylglycerol kinase, gamma 90kDa	Kinase Set	AAGGGAATAAACCGCGAAGAA	-0.7	1.06742
DGKG	1608	diacylglycerol kinase, gamma 90kDa	Kinase Set	TGCAGCCATGTTGCACGATTA	-0.36	1.17214
DGKG	1608	diacylglycerol kinase, gamma 90kDa	Kinase Set	AACAGCGCAGATACTAATATA	-0.01	1.01055
DGKH	160851	diacylglycerol kinase, eta	Kinase Set	CCGGATCTAGATTCCGTAGAT	-0.9	1.0082
DGKH	160851	diacylglycerol kinase, eta	Kinase Set	TGGGAGTTCGATTATCAACAA	-0.22	1.03393
DGKH	160851	diacylglycerol kinase, eta	Kinase Set	CTCCTAGTGCTTAGTGGTCAA	-0.7	0.951617
DGKH	160851	diacylglycerol kinase, eta	Kinase Set	CAGGTGGAGTATAATGACATA	1.32	1.09426
DGKI	9162	diacylglycerol kinase, iota	Kinase Set	AACCCTCCGTTTCATTATATA	0	1.02241
DGKI	9162	diacylglycerol kinase, iota	Kinase Set	ACGGATCGAATGGTACTTACA	0.64	1.15717
DGKI	9162	diacylglycerol kinase, iota	Kinase Set	CAGAAGGATGCTTCAACTATT	-0.43	1.34612
DGKI	9162	diacylglycerol kinase, iota	Kinase Set	TAGAAAGCCGTCAGAACTATA	0.06	0.999653
DGKK	139189	diacylglycerol kinase, kappa	Kinase Set	ATGGAGTGTGATGATTCGTGA	0	1.01798
DGKK	139189	diacylglycerol kinase, kappa	Kinase Set	CACCTGAATCTATACGCTTCA	0	0.971503
DGKK	139189	diacylglycerol kinase, kappa	Kinase Set	ACCATCGAGATCTCAACTGTA	4.96	1.68093
DGKK	139189	diacylglycerol kinase, kappa	Kinase Set	TTCGTGAGACTCCCAGACAAA	2.86	1.06982
DGKQ	1609	diacylglycerol kinase, theta 110kDa	Kinase Set	CCGGAAGGTGACGCTCACCAA	0.36	0.991962
DGKQ	1609	diacylglycerol kinase, theta 110kDa	Kinase Set	CAGCGACACCAGGTTTGAGAA	0.15	1.07361
DGKQ	1609	diacylglycerol kinase, theta 110kDa	Kinase Set	CACCGTGGTGTCCGTGAGTCA	-0.14	1.09541
DGKQ	1609	diacylglycerol kinase, theta 110kDa	Kinase Set	CAAGATCGTGCAGATGAGTAA	1.63	1.26869
DGKZ	8525	diacylglycerol kinase, zeta 104kDa	Kinase Set	CTGGAGCGAGTCAGCGACATA	-0.01	1.0514
DGKZ	8525	diacylglycerol kinase, zeta 104kDa	Kinase Set	CAGCTGGGTGTGACTCAGTAA	-1.89	0.850911
DGKZ	8525	diacylglycerol kinase, zeta 104kDa	Kinase Set	CAGCAAGGATGTGGTCCGCTA	1.42	0.925845
DGKZ	8525	diacylglycerol kinase, zeta 104kDa	Kinase Set	CAAGAGGAACGACTTCTGTAA	-0.66	0.903632
DGUOK	1716	deoxyguanosine kinase	Kinase Set	CAGCACGATGGTCCTACACAT	-0.12	0.967232
DGUOK	1716	deoxyguanosine kinase	Kinase Set	CCGCCTGAAAGTACAGCTGGA	-0.35	0.978425
DGUOK	1716	deoxyguanosine kinase	Kinase Set	AAGGCTCTCCATCGAAGGCAA	0.07	1.01978
DGUOK	1716	deoxyguanosine kinase	Kinase Set	CACGTAGCTACAGAACCTGTA	-1.03	0.921904
DKFZP566K0524	26095	DKFZP566K0524 protein	Phosphatase Set	CCCACCCTAACACTTAACATA	0.45	1.21269
DKFZP566K0524	26095	DKFZP566K0524 protein	Phosphatase Set	CTGGTGACAAGCTATACCTAA	-0.37	1.16718
DKFZP566K0524	26095	DKFZP566K0524 protein	Phosphatase Set	TTGAATTGGTTGAATAATTAA	-1.93	1.02519
DKFZP566K0524	26095	DKFZP566K0524 protein	Phosphatase Set	TCACCTCTGTTGAAACATTTA	-1.54	0.825979
DLG1	1739	discs, large homolog 1 (Drosophila)	Kinase Set	GAGATCGTATTATATCGGTAA	0.41	1.07356
DLG1	1739	discs, large homolog 1 (Drosophila)	Kinase Set	AGGGTCTATTGTACGCTTGTA	1.45	0.929738
DLG1	1739	discs, large homolog 1 (Drosophila)	Kinase Set	ATGACTGTATATTACGAGTAA	15.35	2.37093
DLG1	1739	discs, large homolog 1 (Drosophila)	Kinase Set	TCGTAGGTTGTTAACCACATA	3.06	1.1308
DMPK	1760	dystrophia myotonica-protein kinase	Kinase Set	AACCAGAACTTCGCCAGTCAA	2.88	1.21828
DMPK	1760	dystrophia myotonica-protein kinase	Kinase Set	CACCTATCGTTGGTTCGCAAA	-2.31	0.873597
DMPK	1760	dystrophia myotonica-protein kinase	Kinase Set	CACGGCGGAGACCTATGGCAA	0.47	1.20274
DMPK	1760	dystrophia myotonica-protein kinase	Kinase Set	CAGCGAGGTAGCGGTAGTGAA	1.06	0.937421
DOK1	1796	docking protein 1, 62kDa (downstream of tyrosine kinase 1)	Kinase Set	AAGGATCCCAATTCTGGGTAA	-0.2	0.963445
DOK1	1796	docking protein 1, 62kDa (downstream of tyrosine kinase 1)	Kinase Set	ACCTCTCTATTGGGACTTGTA	0.08	0.835781
DOK1	1796	docking protein 1, 62kDa (downstream of tyrosine kinase 1)	Kinase Set	AGGGATCAAAGAAGATGGTTA	1.13	1.07539
DOK1	1796	docking protein 1, 62kDa (downstream of tyrosine kinase 1)	Kinase Set	TCGGGTGAAGGAGGAGGGCTA	0.07	0.93175
DOLPP1	57171	dolichyl pyrophosphate phosphatase 1	Phosphatase Set	AAGAATGCACCAAACAAACAA	-1.3	1.05917
DOLPP1	57171	dolichyl pyrophosphate phosphatase 1	Phosphatase Set	CAGGGTCTACCTGCTGTACCA	0.26	1.14728
DOLPP1	57171	dolichyl pyrophosphate phosphatase 1	Phosphatase Set	GAGGTGGTTTGATTTAAGAAA	0.47	1.08095
DOLPP1	57171	dolichyl pyrophosphate phosphatase 1	Phosphatase Set	CAGGATGGACAGGATGACAGA	-1.17	0.820133
DSTYK	25778	dual serine/threonine and tyrosine protein kinase	Kinase Set	TTGCTTCATCGTAAACCTAAA	2.18	1.10252
DSTYK	25778	dual serine/threonine and tyrosine protein kinase	Kinase Set	CTGGTCCATTAGATTCCGAAA	2.07	1.24099
DSTYK	25778	dual serine/threonine and tyrosine protein kinase	Kinase Set	CGGCCAGGATTGTAACGTCAA	0.38	0.998295
DSTYK	25778	dual serine/threonine and tyrosine protein kinase	Kinase Set	AACGTCTGGAATATACTCGAA	35.81	3.09675
DTYMK	1841	deoxythymidylate kinase (thymidylate kinase)	Kinase Set	TCCCGGAAAGATCAACTGAAA	0.03	1.21749
DTYMK	1841	deoxythymidylate kinase (thymidylate kinase)	Kinase Set	ATCAGTTGGAATTCTCCTAAA	-3.63	0.777263
DTYMK	1841	deoxythymidylate kinase (thymidylate kinase)	Kinase Set	AAGTGCCGTTAATTAAGGAAA	0.85	1.20887
DTYMK	1841	deoxythymidylate kinase (thymidylate kinase)	Kinase Set	GACCCTCGTCGTGGACAGATA	0	0.972048
DUSP10	11221	dual specificity phosphatase 10	Phosphatase Set	ATGAGAATACAGGCTCTCTAA	0.89	1.16689
DUSP10	11221	dual specificity phosphatase 10	Phosphatase Set	CAGGTTCATAGACCGAAGATA	0.71	1.23604
DUSP10	11221	dual specificity phosphatase 10	Phosphatase Set	CAGGGCAGCTTAAGTGGTCTA	0	0.977917
DUSP10	11221	dual specificity phosphatase 10	Phosphatase Set	CCGAAGATACTACACACTTTA	0.41	0.906543
DUSP11	8446	dual specificity phosphatase 11 (RNA/RNP complex 1-interacting)	Phosphatase Set	CAGAAACTGTTCCTTACTTAA	1.73	1.29951
DUSP11	8446	dual specificity phosphatase 11 (RNA/RNP complex 1-interacting)	Phosphatase Set	CCCTTATGTATTCAAGCTTAA	1.08	1.35852
DUSP11	8446	dual specificity phosphatase 11 (RNA/RNP complex 1-interacting)	Phosphatase Set	CACAATAAGCCTGTTAAACAA	-1.43	1.02507
DUSP11	8446	dual specificity phosphatase 11 (RNA/RNP complex 1-interacting)	Phosphatase Set	ATGATGCAATTGAATTATTCA	0	0.90138
DUSP12	11266	dual specificity phosphatase 12	Phosphatase Set	ATGCTTTACATGGCAATCAAA	0.06	1.17808
DUSP12	11266	dual specificity phosphatase 12	Phosphatase Set	TACCGTTTCACAAGGATTGAA	-1.72	1.03146
DUSP12	11266	dual specificity phosphatase 12	Phosphatase Set	CTCAATGTACATCTTATTTCA	-1	1.01631
DUSP12	11266	dual specificity phosphatase 12	Phosphatase Set	CAAGCTCAATGTACATCTTAT	0	0.836058
DUSP13	51207	dual specificity phosphatase 13	Phosphatase Set	ACCCTGAGATGTAAACAGCAA	1.7	1.29275
DUSP13	51207	dual specificity phosphatase 13	Phosphatase Set	TCAGTCCATCTCTATAATAAA	-0.51	1.19395
DUSP13	51207	dual specificity phosphatase 13	Phosphatase Set	ACCCAATTCAGAGATTCTTTA	0.37	1.14161
DUSP13	51207	dual specificity phosphatase 13	Phosphatase Set	CAGGTGGACACAGGTGCCAAA	0.16	0.890674
DUSP14	11072	dual specificity phosphatase 14	Phosphatase Set	AAGGGAATGCATACATTGCTA	-0.76	1.14492
DUSP14	11072	dual specificity phosphatase 14	Phosphatase Set	ACCCTTATTATTTAGCTGTTA	-0.02	1.1608
DUSP14	11072	dual specificity phosphatase 14	Phosphatase Set	CCCAGGATTATATTAGCATTA	-4.17	0.874574
DUSP14	11072	dual specificity phosphatase 14	Phosphatase Set	TAGCTGTTAAGTAACTATAAT	0.55	0.931352
DUSP15	128853	dual specificity phosphatase-like 15	Phosphatase Set	ACGGGCCTGGAGGGTATTAAA	-0.13	1.11908
DUSP15	128853	dual specificity phosphatase-like 15	Phosphatase Set	CACCACGATTGTGACAGCGTA	0.72	1.00617
DUSP15	128853	dual specificity phosphatase-like 15	Phosphatase Set	CTGGAGGGTATTAAAGAGACA	0.68	1.11649
DUSP15	128853	dual specificity phosphatase-like 15	Phosphatase Set	CCGAAATAAGATCACACACAT	-1.5	0.812009
DUSP16	80824	dual specificity phosphatase 16	Phosphatase Set	AAGGTTGTAGTTTACGATCAA	1.01	1.18511
DUSP16	80824	dual specificity phosphatase 16	Phosphatase Set	CCGGCCATTTGTGGAATACAA	-1.2	0.927586
DUSP16	80824	dual specificity phosphatase 16	Phosphatase Set	CAGGACAAAGTGTTAATTACA	-0.23	1.15756
DUSP16	80824	dual specificity phosphatase 16	Phosphatase Set	AACCCAGTTGTTACTCTCTTA	-1.69	0.840807
DUSP18	150290	dual specificity phosphatase 18	Phosphatase Set	ACGGGTCTCTCTCCCGAAGAA	0.64	1.15091
DUSP18	150290	dual specificity phosphatase 18	Phosphatase Set	CCAGATCACCATGGTCATCAA	0	1.07765
DUSP18	150290	dual specificity phosphatase 18	Phosphatase Set	CAGGAATGAATCTGCTACAAT	0.73	0.999756
DUSP18	150290	dual specificity phosphatase 18	Phosphatase Set	CAAGCTCATGCTGTCTAGCAA	-0.29	0.854679
DUSP19	142679	dual specificity phosphatase 19	Phosphatase Set	ATGGTCAGTATCACTGGATAA	0.23	1.10155
DUSP19	142679	dual specificity phosphatase 19	Phosphatase Set	CAGAGTTAACCTAATGAGTCA	-0.77	0.704611
DUSP19	142679	dual specificity phosphatase 19	Phosphatase Set	TACGGTCCTCTTTCTCACATA	-0.67	0.976806
DUSP19	142679	dual specificity phosphatase 19	Phosphatase Set	AAGGTCATATATACTATACAA	0	0.856224
DUSP2	1844	dual specificity phosphatase 2	Phosphatase Set	CAGCCTGAGAGCTCCAAGGAA	-0.46	1.08292
DUSP2	1844	dual specificity phosphatase 2	Phosphatase Set	CTGGTCCACCACCATGTTGAA	-0.67	0.97303
DUSP2	1844	dual specificity phosphatase 2	Phosphatase Set	AAACTTAGCACTTTATATTTA	0.01	1.17422
DUSP2	1844	dual specificity phosphatase 2	Phosphatase Set	CGCGGGAAAGACCGAAAGGAA	0	0.951257
DUSP21	63904	dual specificity phosphatase 21	Phosphatase Set	AACGTAGTAAGCCTTACCTTA	0.01	1.10093
DUSP21	63904	dual specificity phosphatase 21	Phosphatase Set	TCGGTGGAAGTGGTCAACGTA	2.01	0.970688
DUSP21	63904	dual specificity phosphatase 21	Phosphatase Set	ACCGGATGGTGCCTTGTTAAA	0	1.10419
DUSP21	63904	dual specificity phosphatase 21	Phosphatase Set	ACGTACGATGATATCAATGTA	4.56	0.925899
DUSP22	56940	dual specificity phosphatase 22	Phosphatase Set	CATGTTTATGTTGAGAACTAA	0	1.03766
DUSP22	56940	dual specificity phosphatase 22	Phosphatase Set	GGGCAACTTAGCCAAGTTTAA	1.45	1.28916
DUSP22	56940	dual specificity phosphatase 22	Phosphatase Set	AAGCAACATAGAGTTTAAGTA	2.2	1.09768
DUSP22	56940	dual specificity phosphatase 22	Phosphatase Set	AAGCATGAGGTCCATCAGTAT	0.39	0.863343
DUSP23	54935	dual specificity phosphatase 23	Phosphatase Set	CAGTTCTACCAGCGAACGAAA	0	1.06385
DUSP23	54935	dual specificity phosphatase 23	Phosphatase Set	GAAGTGGACTAAAGTATTAAA	2.46	1.29823
DUSP23	54935	dual specificity phosphatase 23	Phosphatase Set	TTGGCTGAAGACACTGAAGTA	-1.32	1.13977
DUSP23	54935	dual specificity phosphatase 23	Phosphatase Set	CAGGAGATGCCATTGCTGAAA	-0.59	0.817039
DUSP24	51657	dual specificity phosphatase 24 (putative)	Phosphatase Set	AAGCTTCTGCACATCCGGATA	-1.3	1.1902
DUSP24	51657	dual specificity phosphatase 24 (putative)	Phosphatase Set	CAAGATTCAGAAGGACTTGAA	2.06	1.30858
DUSP24	51657	dual specificity phosphatase 24 (putative)	Phosphatase Set	CACCCTGGAGATACTCTTAAA	0	1.01426
DUSP24	51657	dual specificity phosphatase 24 (putative)	Phosphatase Set	CTGCCTGAAAGTCTCATGTTA	0.98	0.951643
DUSP3	1845	dual specificity phosphatase 3 (vaccinia virus phosphatase VH1-related)	Phosphatase Set	CCCGCGGATCTACGTGGGCAA	0.01	1.00453
DUSP3	1845	dual specificity phosphatase 3 (vaccinia virus phosphatase VH1-related)	Phosphatase Set	CCGTATTTACTTAACAAGATT	0.94	1.06606
DUSP3	1845	dual specificity phosphatase 3 (vaccinia virus phosphatase VH1-related)	Phosphatase Set	AACAGATTCGTTGGAAGCTTA	2.64	1.27253
DUSP3	1845	dual specificity phosphatase 3 (vaccinia virus phosphatase VH1-related)	Phosphatase Set	TACGTTATTGTTATTATGGAA	2.6	1.02078
DUSP6	1848	dual specificity phosphatase 6	Phosphatase Set	CTGCATTGCGAGACCAATCTA	0.31	1.04155
DUSP6	1848	dual specificity phosphatase 6	Phosphatase Set	TACGGACACTATTATCACTAA	0.57	1.12505
DUSP6	1848	dual specificity phosphatase 6	Phosphatase Set	TGCGGAATTGGTTAATACTAA	0.2	1.17155
DUSP6	1848	dual specificity phosphatase 6	Phosphatase Set	TCAGCTGTGCTAAACAGTATA	0	0.936123
DUSP7	1849	dual specificity phosphatase 7	Phosphatase Set	CAAGGTGGTTTCAACAAGTTT	1.56	1.09549
DUSP7	1849	dual specificity phosphatase 7	Phosphatase Set	CGGCGGCGAGTTCACCTACAA	4.65	1.2251
DUSP7	1849	dual specificity phosphatase 7	Phosphatase Set	TACGACTTTGTCAAGAGGAAA	2.43	1.25937
DUSP7	1849	dual specificity phosphatase 7	Phosphatase Set	GAAGATGAACCTGTCACTCAA	0.04	0.94999
DUSP8	1850	dual specificity phosphatase 8	Phosphatase Set	CCGCTCCTTCGTGGAGTACAA	-0.98	1.04309
DUSP8	1850	dual specificity phosphatase 8	Phosphatase Set	TCCATCGAGTTCATCGATAAA	-0.78	1.00221
DUSP8	1850	dual specificity phosphatase 8	Phosphatase Set	CAGGCCCGTTATAAATGTATA	-0.01	1.05903
DUSP8	1850	dual specificity phosphatase 8	Phosphatase Set	GCGGGTGGTCCTCGAGCTCTA	-0.52	0.865236
DUT	1854	dUTP pyrophosphatase	Phosphatase Set	AAGCCTTGGATGACACCGAAA	0.99	1.11211
DUT	1854	dUTP pyrophosphatase	Phosphatase Set	TCCCTTCTCTTCACTAGTCTA	-1.14	0.971451
DUT	1854	dUTP pyrophosphatase	Phosphatase Set	AAGCCTGTATTTAACTCATAT	-2.54	1.07345
DUT	1854	dUTP pyrophosphatase	Phosphatase Set	AAAGCCTGTATTTAACTCATA	-0.06	0.958109
DYRK1A	1859	dual-specificity tyrosine-(Y)-phosphorylation regulated kinase 1A	Kinase Set	TACGGTCGCTGACTACTTGAA	43.5	2.73781
DYRK1A	1859	dual-specificity tyrosine-(Y)-phosphorylation regulated kinase 1A	Kinase Set	CTCTTTGAACCTAACACGAAA	-3.46	0.990916
DYRK1A	1859	dual-specificity tyrosine-(Y)-phosphorylation regulated kinase 1A	Kinase Set	TACAAGCATATTAATGAGGTT	0.99	1.2038
DYRK1A	1859	dual-specificity tyrosine-(Y)-phosphorylation regulated kinase 1A	Kinase Set	CCTGCTCATATTCTTGACCAA	0.26	0.944987
DYRK1B	9149	dual-specificity tyrosine-(Y)-phosphorylation regulated kinase 1B	Kinase Set	AAGGACGAAAGAACTCAGGAA	-0.49	0.942519
DYRK1B	9149	dual-specificity tyrosine-(Y)-phosphorylation regulated kinase 1B	Kinase Set	CCAGGATTCGAGCAACAAGAA	-2.42	0.825304
DYRK1B	9149	dual-specificity tyrosine-(Y)-phosphorylation regulated kinase 1B	Kinase Set	CCGGACCTACCGCTACAGCAA	-0.23	0.948599
DYRK1B	9149	dual-specificity tyrosine-(Y)-phosphorylation regulated kinase 1B	Kinase Set	CACGGAGATGAAGTACTATAT	-1.06	0.92524
DYRK2	8445	dual-specificity tyrosine-(Y)-phosphorylation regulated kinase 2	Kinase Set	AAGCGGTATTAAAGTAATTGA	-1.3	1.02258
DYRK2	8445	dual-specificity tyrosine-(Y)-phosphorylation regulated kinase 2	Kinase Set	CCCAGAGATAGCATTCCTCTA	-1.5	0.932883
DYRK2	8445	dual-specificity tyrosine-(Y)-phosphorylation regulated kinase 2	Kinase Set	TGGGCTTACAACAGTGGGCAA	-2.04	1.07041
DYRK2	8445	dual-specificity tyrosine-(Y)-phosphorylation regulated kinase 2	Kinase Set	CACCGGTGCTATCACATCTAT	1.54	1.25854
DYRK3	8444	dual-specificity tyrosine-(Y)-phosphorylation regulated kinase 3	Kinase Set	AGCCAATAAGCTTAAAGCTAA	2.07	1.06112
DYRK3	8444	dual-specificity tyrosine-(Y)-phosphorylation regulated kinase 3	Kinase Set	CACCTTCATGATGATAGATGA	0.05	1.01825
DYRK3	8444	dual-specificity tyrosine-(Y)-phosphorylation regulated kinase 3	Kinase Set	AAACTGGTAGTATGAACGTTA	0.81	1.4072
DYRK3	8444	dual-specificity tyrosine-(Y)-phosphorylation regulated kinase 3	Kinase Set	AACGGGTAGTTAATCCTGCAA	0.53	1.01709
DYRK4	8798	dual-specificity tyrosine-(Y)-phosphorylation regulated kinase 4	Kinase Set	CTGCATCACGGCGGAGTTGTA	0.03	1.05594
DYRK4	8798	dual-specificity tyrosine-(Y)-phosphorylation regulated kinase 4	Kinase Set	CTCCATATGAACAAAGTGAAA	-1.93	0.974565
DYRK4	8798	dual-specificity tyrosine-(Y)-phosphorylation regulated kinase 4	Kinase Set	ACACGGCTCCTGAGAAATTTA	2.74	1.31385
DYRK4	8798	dual-specificity tyrosine-(Y)-phosphorylation regulated kinase 4	Kinase Set	CAGATGCTTTCGGTAGAGAAA	-0.71	0.965179
EEF2K	29904	eukaryotic elongation factor-2 kinase	Kinase Set	CGGGCTAGGAGGAAAGATTAA	-1.41	0.996057
EEF2K	29904	eukaryotic elongation factor-2 kinase	Kinase Set	CAGCGACGATGAGGAAGGTTA	0.05	0.845976
EEF2K	29904	eukaryotic elongation factor-2 kinase	Kinase Set	CAGAGCCAGGATTATCATCCA	-2.84	0.832095
EEF2K	29904	eukaryotic elongation factor-2 kinase	Kinase Set	CTGGAAGATATTGCCACCGAA	0.37	1.01357
EGFR	1956	epidermal growth factor receptor (erythroblastic leukemia viral (v-erb-b) oncogene homolog, avian)	Kinase Set	CAGGAACTGGATATTCTGAAA	-1.18	0.986458
EGFR	1956	epidermal growth factor receptor (erythroblastic leukemia viral (v-erb-b) oncogene homolog, avian)	Kinase Set	CCCATCCAATTTATCAAGGAA	-0.19	0.787413
EGFR	1956	epidermal growth factor receptor (erythroblastic leukemia viral (v-erb-b) oncogene homolog, avian)	Kinase Set	AAGCTCACGCAGTTGGGCACT	0.25	1.00775
EGFR	1956	epidermal growth factor receptor (erythroblastic leukemia viral (v-erb-b) oncogene homolog, avian)	Kinase Set	CAGAGGAAATATGTACTACGA	-0.74	0.970564
EIF2AK1	27102	eukaryotic translation initiation factor 2-alpha kinase 1	Kinase Set	CTGATTAAGGGTGCAACTAAA	0.09	0.993586
EIF2AK1	27102	eukaryotic translation initiation factor 2-alpha kinase 1	Kinase Set	CAGGCGTAATTCCCACCTAGA	0.4	1.01004
EIF2AK1	27102	eukaryotic translation initiation factor 2-alpha kinase 1	Kinase Set	ATGCTTCGTTGTATTTAGTAA	-0.45	1.06927
EIF2AK1	27102	eukaryotic translation initiation factor 2-alpha kinase 1	Kinase Set	AAGGTGGATACGGAAGAGTAT	-0.51	0.916724
EIF2AK2	5610	eukaryotic translation initiation factor 2-alpha kinase 2	Kinase Set	ACGGAAAGACTTACGTTATTA	0.76	0.970622
EIF2AK2	5610	eukaryotic translation initiation factor 2-alpha kinase 2	Kinase Set	TACGTGTGAGTCCCAAAGCAA	-1.85	0.888968
EIF2AK2	5610	eukaryotic translation initiation factor 2-alpha kinase 2	Kinase Set	CAGAAGGTGAAGGTAGATCAA	-1.11	0.987666
EIF2AK2	5610	eukaryotic translation initiation factor 2-alpha kinase 2	Kinase Set	CTCCACATGATAGGAGGTTTA	-1.1	1.01552
EIF2AK3	9451	eukaryotic translation initiation factor 2-alpha kinase 3	Kinase Set	CACAAACTGTATAACGGTTTA	0	1.17292
EIF2AK3	9451	eukaryotic translation initiation factor 2-alpha kinase 3	Kinase Set	ATGGAACGACCTGAAGCTATA	0	1.08973
EIF2AK3	9451	eukaryotic translation initiation factor 2-alpha kinase 3	Kinase Set	CGCGCGGCAGGTCATTAGTAA	0.41	1.16054
EIF2AK3	9451	eukaryotic translation initiation factor 2-alpha kinase 3	Kinase Set	CTCTGGATATATATCACGATA	1.38	1.11518
EIF2AK4	440275	eukaryotic translation initiation factor 2 alpha kinase 4	Kinase Set	TACACCTATGACAGCGACATA	0.75	1.07439
EIF2AK4	440275	eukaryotic translation initiation factor 2 alpha kinase 4	Kinase Set	TCCGATAATCTTGCAGTGCAA	0	1.0328
EIF2AK4	440275	eukaryotic translation initiation factor 2 alpha kinase 4	Kinase Set	CAAGGTTAAGTCTTTCGAGAA	0.26	1.05835
EIF2AK4	440275	eukaryotic translation initiation factor 2 alpha kinase 4	Kinase Set	TTAGATCGATTTCATCCCAAA	-0.12	1.01539
ENPP1	5167	ectonucleotide pyrophosphatase/phosphodiesterase 1	Phosphatase Set	CACCGGCTCCTAATAACGGAA	0.42	1.07615
ENPP1	5167	ectonucleotide pyrophosphatase/phosphodiesterase 1	Phosphatase Set	CAGATAAATACTATTCATTTA	1.49	1.12088
ENPP1	5167	ectonucleotide pyrophosphatase/phosphodiesterase 1	Phosphatase Set	TGGGCAAACAGTAGACTTATA	-0.32	0.88975
ENPP1	5167	ectonucleotide pyrophosphatase/phosphodiesterase 1	Phosphatase Set	AAGCATGAAACTTTACCCTAT	0.34	0.986428
ENPP2	5168	ectonucleotide pyrophosphatase/phosphodiesterase 2 (autotaxin)	Phosphatase Set	ATGGATCATTATGCTGCGGAA	0.36	1.09799
ENPP2	5168	ectonucleotide pyrophosphatase/phosphodiesterase 2 (autotaxin)	Phosphatase Set	CGGACTAGATATGATATCTTA	0	1.12937
ENPP2	5168	ectonucleotide pyrophosphatase/phosphodiesterase 2 (autotaxin)	Phosphatase Set	AAGCCTTATAAACCAATCTTA	-0.01	0.989277
ENPP2	5168	ectonucleotide pyrophosphatase/phosphodiesterase 2 (autotaxin)	Phosphatase Set	CAGATATATTTAAGCCTTATA	1.34	1.02734
ENPP3	5169	ectonucleotide pyrophosphatase/phosphodiesterase 3	Phosphatase Set	AACCTAATGTGTGATCTTCTA	-1.33	1.0375
ENPP3	5169	ectonucleotide pyrophosphatase/phosphodiesterase 3	Phosphatase Set	CTGGCTGTTAGGAGTAAATCA	-1.8	0.951986
ENPP3	5169	ectonucleotide pyrophosphatase/phosphodiesterase 3	Phosphatase Set	TAGCAATTTGGTACCTATGTA	-0.1	0.908085
ENPP3	5169	ectonucleotide pyrophosphatase/phosphodiesterase 3	Phosphatase Set	ATGGTTATAACAATGAGTTTA	-0.31	0.981205
EPHA1	2041	EPH receptor A1	Kinase Set	TACCTCAGTAATCACAATTAT	-1.65	0.956662
EPHA1	2041	EPH receptor A1	Kinase Set	AAGCGCATTCTTTGCAGTATT	-1.38	0.615617
EPHA1	2041	EPH receptor A1	Kinase Set	CACCTTTAATGTGGAAGCCCA	-3.98	0.786806
EPHA1	2041	EPH receptor A1	Kinase Set	CAGATGGGATCCCATATCGAA	-2.96	0.822901
EPHA10	284656	EPH receptor A10	Kinase Set	CTCGGTGCGCGTCTACTACAA	-0.72	0.941419
EPHA10	284656	EPH receptor A10	Kinase Set	CTGGACTGCACTGCCAAGTAA	0.98	0.957738
EPHA10	284656	EPH receptor A10	Kinase Set	CCGCGGGTACCTGCAAGGAGA	-1.47	0.892913
EPHA10	284656	EPH receptor A10	Kinase Set	CTGGAGGGCGTTGTTACCCGA	0	1.03973
EPHA2	1969	EPH receptor A2	Kinase Set	CAGCGCCAAGTAAACAGGGTA	1.06	1.10142
EPHA2	1969	EPH receptor A2	Kinase Set	AAGCGCCTGTTCACCAAGATT	0	0.933311
EPHA2	1969	EPH receptor A2	Kinase Set	AAGGAAGTGGTACTGCTGGAC	1.25	1.0345
EPHA2	1969	EPH receptor A2	Kinase Set	TTGCAGATGATTCAAACCGAA	0	1.15785
EPHA3	2042	EPH receptor A3	Kinase Set	TTGGATAGTTTCCTACGTAAA	-1.17	0.803131
EPHA3	2042	EPH receptor A3	Kinase Set	ATCACCTGTCCTGACGATTAA	-4.54	0.701568
EPHA3	2042	EPH receptor A3	Kinase Set	AAGCCTGACACTATATACGTA	-0.09	1.07536
EPHA3	2042	EPH receptor A3	Kinase Set	CCGCTGGATATGGGACGAACA	-1.72	0.963113
EPHA4	2043	EPH receptor A4	Kinase Set	CCCGCGAATGAAGTTACCTTA	-0.15	0.925164
EPHA4	2043	EPH receptor A4	Kinase Set	ACGTACGAAGATCCCAACCAA	0.3	1.06968
EPHA4	2043	EPH receptor A4	Kinase Set	CCAGTACTGAATAAACTCAAA	1.15	1.10983
EPHA5	2044	EPH receptor A5	Kinase Set	CCCGGCAGTATGTGTCTGTAA	-8.68	0.590329
EPHA5	2044	EPH receptor A5	Kinase Set	ACCAGTTGGATCTCCAATGAA	0.57	1.05028
EPHA5	2044	EPH receptor A5	Kinase Set	TTGGCAGAACATAGCCCACTA	-0.64	0.963965
EPHA5	2044	EPH receptor A5	Kinase Set	ACCAGCTACACGATTATCAAA	0.12	1.08061
EPHA6	285220	EPH receptor A6	Kinase Set	CAATAGCAACTTAGTATGCAA	0.89	1.07174
EPHA6	285220	EPH receptor A6	Kinase Set	CTGGGAGATGTCAGTGGTACA	-0.05	1.02322
EPHA6	285220	EPH receptor A6	Kinase Set	CTCCTCGTCATCCTCACTTTA	-0.81	1.05834
EPHA6	285220	EPH receptor A6	Kinase Set	TTGCGCTTCCCGGGAATTAAA	-0.34	0.913761
EPHA7	2045	EPH receptor A7	Kinase Set	ACCAGTCATGATAGTAATAGA	0.4	1.01572
EPHA7	2045	EPH receptor A7	Kinase Set	CAGGCTGCGAAGGAAGTACTA	-0.64	0.917222
EPHA7	2045	EPH receptor A7	Kinase Set	AGACTTGATGTTGCTACACTA	0.31	1.18836
EPHA7	2045	EPH receptor A7	Kinase Set	CACCATACGTTGCATGCACAA	-1.26	0.976259
EPHA8	2046	EPH receptor A8	Kinase Set	GAGCGTGTGCTTATCCGTTAA	0.35	0.921472
EPHA8	2046	EPH receptor A8	Kinase Set	GAGCGTGTGCTTATCCGTTAA	-1.22	0.960978
EPHA8	2046	EPH receptor A8	Kinase Set	ACGGCCCACCAGGGTATGTAA	0.13	0.937849
EPHA8	2046	EPH receptor A8	Kinase Set	ACGGCCCACCAGGGTATGTAA	-1.39	0.952775
EPHA8	2046	EPH receptor A8	Kinase Set	GCGCGTCTATGCTGAGATCAA	-0.29	0.866532
EPHA8	2046	EPH receptor A8	Kinase Set	GCGCGTCTATGCTGAGATCAA	-0.45	0.934901
EPHA8	2046	EPH receptor A8	Kinase Set	CAGGCTAGTGTGGCCGTCGAA	-0.33	0.945778
EPHA8	2046	EPH receptor A8	Kinase Set	CAGGCTAGTGTGGCCGTCGAA	-2.35	0.954129
EPHB1	2047	EPH receptor B1	Kinase Set	ATGGCCCTGGATTATCTACTA	0	0.955611
EPHB1	2047	EPH receptor B1	Kinase Set	GCGGGATGATGTGACCTACAA	-1.04	1.00565
EPHB1	2047	EPH receptor B1	Kinase Set	CTGCGATGGAAGAAACGTTAA	0.11	1.06423
EPHB1	2047	EPH receptor B1	Kinase Set	AGGAAACGGGCTTATAGCAAA	0.93	1.06455
EPHB2	2048	EPH receptor B2	Kinase Set	CACGCTTTCTAGAGGACGATA	-1.38	0.987755
EPHB2	2048	EPH receptor B2	Kinase Set	CCGAGAGGACCTCGTCTACAA	0.67	0.928279
EPHB2	2048	EPH receptor B2	Kinase Set	CACGGACAAGCTGCAACACTA	-2.54	0.835655
EPHB2	2048	EPH receptor B2	Kinase Set	TAGGCCTCACTCAACAACCAA	-0.46	0.952215
EPHB3	2049	EPH receptor B3	Kinase Set	CACAATAACTTCTACCGTGCA	0.87	1.2118
EPHB3	2049	EPH receptor B3	Kinase Set	TCCCAGATTACACAACCTTCA	0	1.06987
EPHB3	2049	EPH receptor B3	Kinase Set	CCGCAGCTGACCGCCAGATTA	1.17	1.2719
EPHB3	2049	EPH receptor B3	Kinase Set	CAGGTCCGTGCCCGCACAGTA	-0.22	0.984284
EPHB4	2050	EPH receptor B4	Kinase Set	CCCAGCCAATAGCCACTCTAA	-2.48	0.976685
EPHB4	2050	EPH receptor B4	Kinase Set	TCGGACAAACACGGACAGTAT	5.23	1.26083
EPHB4	2050	EPH receptor B4	Kinase Set	CACCGGGAAGGTGAATGTCAA	-0.19	1.20677
EPHB4	2050	EPH receptor B4	Kinase Set	CTGGCGGGACACCAGAAGAAA	1.05	0.909877
EPHB6	2051	EPH receptor B6	Kinase Set	AACCGCCAATCTCTAGATCAA	-0.87	0.951799
EPHB6	2051	EPH receptor B6	Kinase Set	CTGGAGCTTTGGGATACTCAT	-1.36	0.923184
EPHB6	2051	EPH receptor B6	Kinase Set	CGGGAAGTCGATCCTGCTTAT	1.1	1.34349
EPHB6	2051	EPH receptor B6	Kinase Set	CCGGGAGACCTTCACCCTTTA	-0.33	0.972199
EPS8L1	54869	EPS8-like 1	Kinase Set	CAGCAGTGAGCTGTCGGTCAA	0.13	1.1742
EPS8L1	54869	EPS8-like 1	Kinase Set	AACCACGTGTTCGACGACGTA	-0.37	1.03189
EPS8L1	54869	EPS8-like 1	Kinase Set	CTCCCAGATGCTCATCGTCAA	-0.18	1.03896
EPS8L1	54869	EPS8-like 1	Kinase Set	CTGGGAGGACCCAGTTGAGAA	0.3	1.10907
ERBB2	2064	v-erb-b2 erythroblastic leukemia viral oncogene homolog 2, neuro/glioblastoma derived oncogene homolog (avian)	Kinase Set	CACGTTTGAGTCCATGCCCAA	0.7	1.14694
ERBB2	2064	v-erb-b2 erythroblastic leukemia viral oncogene homolog 2, neuro/glioblastoma derived oncogene homolog (avian)	Kinase Set	CAGCTCTTTGAGGACAACTAT	-0.05	0.840257
ERBB2	2064	v-erb-b2 erythroblastic leukemia viral oncogene homolog 2, neuro/glioblastoma derived oncogene homolog (avian)	Kinase Set	CGGCCCTAAGGGAGTGTCTAA	1.12	0.99757
ERBB2	2064	v-erb-b2 erythroblastic leukemia viral oncogene homolog 2, neuro/glioblastoma derived oncogene homolog (avian)	Kinase Set	AAAGCCAACAAAGAAATCTTA	0.05	0.978891
ERBB3	2065	v-erb-b2 erythroblastic leukemia viral oncogene homolog 3 (avian)	Kinase Set	CTTCGTCATGTTGAACTATAA	-2.69	0.922094
ERBB3	2065	v-erb-b2 erythroblastic leukemia viral oncogene homolog 3 (avian)	Kinase Set	CTTCGTCATGTTGAACTATAA	0.31	0.966419
ERBB3	2065	v-erb-b2 erythroblastic leukemia viral oncogene homolog 3 (avian)	Kinase Set	ACCACGGTATCTGGTCATAAA	-1.52	1.05505
ERBB3	2065	v-erb-b2 erythroblastic leukemia viral oncogene homolog 3 (avian)	Kinase Set	ACCACGGTATCTGGTCATAAA	-0.38	1.27967
ERBB3	2065	v-erb-b2 erythroblastic leukemia viral oncogene homolog 3 (avian)	Kinase Set	CCCAGTGAGAAGGCTAACAAA	-0.31	1.11752
ERBB3	2065	v-erb-b2 erythroblastic leukemia viral oncogene homolog 3 (avian)	Kinase Set	CCCAGTGAGAAGGCTAACAAA	2.13	0.938783
ERBB3	2065	v-erb-b2 erythroblastic leukemia viral oncogene homolog 3 (avian)	Kinase Set	ACCGGCGATGCTGAGAACCAA	1.8	1.34437
ERBB3	2065	v-erb-b2 erythroblastic leukemia viral oncogene homolog 3 (avian)	Kinase Set	ACCGGCGATGCTGAGAACCAA	-1.56	0.867325
ERBB4	2066	v-erb-a erythroblastic leukemia viral oncogene homolog 4 (avian)	Kinase Set	TCGGGATTTGGCAGCCCGTAA	0.67	1.01674
ERBB4	2066	v-erb-a erythroblastic leukemia viral oncogene homolog 4 (avian)	Kinase Set	CTACGTGTTAGTGGCTCTTAA	0.2	0.951848
ERBB4	2066	v-erb-a erythroblastic leukemia viral oncogene homolog 4 (avian)	Kinase Set	CAAGCATTGGATAATCCCGAA	0.81	1.01398
ERBB4	2066	v-erb-a erythroblastic leukemia viral oncogene homolog 4 (avian)	Kinase Set	CACCGGAATACTGTGGTGTAA	-0.59	1.00737
ERN1	2081	endoplasmic reticulum to nucleus signaling 1	Kinase Set	CAGCACGGACGTCAAGTTTGA	1.32	1.0643
ERN1	2081	endoplasmic reticulum to nucleus signaling 1	Kinase Set	CAGGACGTGAGCGACAGAATA	-0.15	1.04989
ERN1	2081	endoplasmic reticulum to nucleus signaling 1	Kinase Set	CCCGATCGTGAAGCAGTTAGA	1.86	1.28857
ERN1	2081	endoplasmic reticulum to nucleus signaling 1	Kinase Set	CTCAGCGAAGCATGTGCTCAA	-1.09	0.756015
ERN2	10595	endoplasmic reticulum to nucleus signaling 2	Kinase Set	AAGGATGAAACTGGCTTCTAT	1.64	1.07116
ERN2	10595	endoplasmic reticulum to nucleus signaling 2	Kinase Set	CAGCCACTCGACGACCCTGAA	-1.82	0.970128
ERN2	10595	endoplasmic reticulum to nucleus signaling 2	Kinase Set	CTGGTTCGGCGGGAAGTTCAA	-4.36	0.698666
ERN2	10595	endoplasmic reticulum to nucleus signaling 2	Kinase Set	CACCTGCACTCTTTACACATA	-1.19	0.78582
ETNK1	55500	ethanolamine kinase 1	Kinase Set	TCCGTATGTGGTGGATTAGAA	1.76	0.990842
ETNK1	55500	ethanolamine kinase 1	Kinase Set	TAAGACTGAGTTATTAGTCGA	-0.11	1.07041
ETNK1	55500	ethanolamine kinase 1	Kinase Set	TCGATCGAGATGAGGAAGTAA	0.95	1.20063
ETNK1	55500	ethanolamine kinase 1	Kinase Set	CTGCCGATTGCTTATTACTTA	0.02	1.09554
ETNK2	55224	ethanolamine kinase 2	Kinase Set	CACGTGCGGTTCATTGACTAT	2.16	1.14765
ETNK2	55224	ethanolamine kinase 2	Kinase Set	CAGGGAGGTGCAAAGGCTCTA	1.25	0.989396
ETNK2	55224	ethanolamine kinase 2	Kinase Set	CAGCCAGGTCCTGAACCATAA	1.68	1.34405
ETNK2	55224	ethanolamine kinase 2	Kinase Set	AGGCGTGAATGAGGTGGATTA	1.66	1.12373
FASTK	10922	Fas-activated serine/threonine kinase	Kinase Set	CAGCAGCAAGGTGGTACAGAA	-0.92	0.979524
FASTK	10922	Fas-activated serine/threonine kinase	Kinase Set	AAGGGTTGGAAGCTGCTCTAA	-0.72	1.01471
FASTK	10922	Fas-activated serine/threonine kinase	Kinase Set	CTGGTGGTTCAGGAAACGCAA	0.2	1.2237
FASTK	10922	Fas-activated serine/threonine kinase	Kinase Set	CCACGTCTCCGAAGACCGATA	0.87	0.838518
FBP1	2203	fructose-1,6-bisphosphatase 1	Phosphatase Set	CTCCAACGACCTGGTTATGAA	-0.18	0.985415
FBP1	2203	fructose-1,6-bisphosphatase 1	Phosphatase Set	CTCGCTCTGCACAGCAGTCAA	1.07	1.13309
FBP1	2203	fructose-1,6-bisphosphatase 1	Phosphatase Set	TTCCTAGAGAGCAGAAATAAA	-1.47	0.936848
FBP1	2203	fructose-1,6-bisphosphatase 1	Phosphatase Set	CCTGGTTATGAACATGTTAAA	-0.67	0.906103
FBP2	8789	fructose-1,6-bisphosphatase 2	Phosphatase Set	CTCAATGCTGACGGCCATCAA	0.52	1.15682
FBP2	8789	fructose-1,6-bisphosphatase 2	Phosphatase Set	AGGACCCTAAATGAACGATAA	-1.88	1.05881
FBP2	8789	fructose-1,6-bisphosphatase 2	Phosphatase Set	CAGGTTATGCGCTGTACGGTA	1.54	1.11764
FBP2	8789	fructose-1,6-bisphosphatase 2	Phosphatase Set	TCCACTTAATCACATACAGAA	0.16	0.922814
FER	2241	fer (fps/fes related) tyrosine kinase	Kinase Set	CAGAACAACTTAGTAGGATAA	1.51	1.15008
FER	2241	fer (fps/fes related) tyrosine kinase	Kinase Set	CAGATAGATCCTAGTACAGAA	-5.45	0.604692
FER	2241	fer (fps/fes related) tyrosine kinase	Kinase Set	ATGAATTATGTCAGCAACGTA	-1.64	0.842591
FER	2241	fer (fps/fes related) tyrosine kinase	Kinase Set	TCACCTAGTAATAATCTTGTA	0.16	1.09274
FES	2242	feline sarcoma oncogene	Kinase Set	CAGCCTGAGGCTGAGTACCAA	-0.11	0.911071
FES	2242	feline sarcoma oncogene	Kinase Set	AAGGCCAAGTTTCTACAGGAA	2.76	1.10377
FES	2242	feline sarcoma oncogene	Kinase Set	ACGGCCGCTACTCCTCCGAAA	0.77	0.9935
FES	2242	feline sarcoma oncogene	Kinase Set	ACCCACGCTGGAGATCCTTAA	-0.38	0.927
FGFR1	2260	fibroblast growth factor receptor 1	Kinase Set	CACCTGGAGCATCATAATGGA	-0.68	1.10294
FGFR1	2260	fibroblast growth factor receptor 1	Kinase Set	CAGCCACACTCTGCACCGCTA	-1.13	0.996079
FGFR1	2260	fibroblast growth factor receptor 1	Kinase Set	CTGCATTGTGGAGAATGAGTA	-0.65	0.96262
FGFR1	2260	fibroblast growth factor receptor 1	Kinase Set	CCCGGTCTGCAAGGAAAGTGA	1	1.12182
FGFR2	2263	fibroblast growth factor receptor 2	Kinase Set	CAGCATATGTGTAAAGATTTA	2.6	1.01372
FGFR2	2263	fibroblast growth factor receptor 2	Kinase Set	TTAGTTGAGGATACCACATTA	0.09	1.03959
FGFR2	2263	fibroblast growth factor receptor 2	Kinase Set	CGGAGGAGCGTTGCCATTCAA	0.52	1.20653
FGFR2	2263	fibroblast growth factor receptor 2	Kinase Set	CACAGCAGACTAGTTAATCTA	0.91	1.14365
FGFR3	2261	fibroblast growth factor receptor 3	Kinase Set	ACCCTACGTTACCGTGCTCAA	1.24	1.0356
FGFR3	2261	fibroblast growth factor receptor 3	Kinase Set	AAGGTTTATCCCGCCGATAGA	0.49	1.059
FGFR3	2261	fibroblast growth factor receptor 3	Kinase Set	CTGAAATTACGGGTACCTGAA	-3.75	1.08199
FGFR3	2261	fibroblast growth factor receptor 3	Kinase Set	TTGGTTCGTTCTGTACTGTTA	1.14	1.10012
FGFR4	2264	fibroblast growth factor receptor 4	Kinase Set	CCGCCTGACCTTCGGACCCTA	0	1.14417
FGFR4	2264	fibroblast growth factor receptor 4	Kinase Set	CAGGCTCTTCCGGCAAGTCAA	0.77	1.17227
FGFR4	2264	fibroblast growth factor receptor 4	Kinase Set	ATCCGCTATAACTACCTGCTA	-0.19	1.12483
FGFR4	2264	fibroblast growth factor receptor 4	Kinase Set	CTCGCCGGCCTCGTGAGTCTA	0	1.06582
FGGY	55277	FGGY carbohydrate kinase domain containing	Kinase Set	ATGAAGGTGGTCAGAGCGTTA	0.31	1.09559
FGGY	55277	FGGY carbohydrate kinase domain containing	Kinase Set	CAGCAGGGCACTCAATCAGTA	-1.94	0.85369
FGGY	55277	FGGY carbohydrate kinase domain containing	Kinase Set	CCCGGACTTCTTATCGTGGAA	0	0.973061
FGGY	55277	FGGY carbohydrate kinase domain containing	Kinase Set	TGCGTGCTGTGTTGTCACAAA	0.01	0.974417
FGR	2268	Gardner-Rasheed feline sarcoma viral (v-fgr) oncogene homolog	Kinase Set	CACGTGGAACGGCAGCACTAA	1.3	1.08361
FGR	2268	Gardner-Rasheed feline sarcoma viral (v-fgr) oncogene homolog	Kinase Set	CACCACACGGGTTCAGTTCAA	-3.07	0.729029
FGR	2268	Gardner-Rasheed feline sarcoma viral (v-fgr) oncogene homolog	Kinase Set	AATGACAATATGAATCCTCAA	-1.15	0.948972
FGR	2268	Gardner-Rasheed feline sarcoma viral (v-fgr) oncogene homolog	Kinase Set	CGCGCCCTGCACCATCATGAA	-0.67	0.964734
FLJ32332	132160	likely ortholog of mouse protein phosphatase 2C eta	Phosphatase Set	TCGGATTATCAATGCAGAGAA	-0.6	1.09638
FLJ32332	132160	likely ortholog of mouse protein phosphatase 2C eta	Phosphatase Set	CAGAGTGACTTTACAACTTAA	0	1.0047
FLJ32332	132160	likely ortholog of mouse protein phosphatase 2C eta	Phosphatase Set	CCCAGAGACTCGGATTATCAA	-1.09	1.09726
FLJ32332	132160	likely ortholog of mouse protein phosphatase 2C eta	Phosphatase Set	CAGGATCTTGAACAGCCCAAA	0.63	0.900869
FLT1	2321	fms-related tyrosine kinase 1 (vascular endothelial growth factor/vascular permeability factor receptor)	Kinase Set	TCGCCGGAAGTTGTATGGTTA	0.58	0.980524
FLT1	2321	fms-related tyrosine kinase 1 (vascular endothelial growth factor/vascular permeability factor receptor)	Kinase Set	ACCGCATATGGTATCCCTCAA	-0.33	0.935122
FLT1	2321	fms-related tyrosine kinase 1 (vascular endothelial growth factor/vascular permeability factor receptor)	Kinase Set	CACTACAGTATTAGCAAGCAA	-1.89	0.888986
FLT1	2321	fms-related tyrosine kinase 1 (vascular endothelial growth factor/vascular permeability factor receptor)	Kinase Set	CTGCCGGGTTACGTCACCTAA	-0.11	1.01948
FLT3	2322	fms-related tyrosine kinase 3	Kinase Set	TACGTTGATTTCAGAGAATAT	-2.3	0.914343
FLT3	2322	fms-related tyrosine kinase 3	Kinase Set	CCGGACTCGGATCAAATCTCA	0.07	0.916359
FLT3	2322	fms-related tyrosine kinase 3	Kinase Set	CGGGCTCACCTGGGAATTAGA	0.29	0.918324
FLT3	2322	fms-related tyrosine kinase 3	Kinase Set	ATGAATAGGTGTTCTACCATA	0	1.12116
FLT3LG	2323	fms-related tyrosine kinase 3 ligand	Kinase Set	CTCCTCCGACTTCGCTGTCAA	-2.13	0.91483
FLT3LG	2323	fms-related tyrosine kinase 3 ligand	Kinase Set	GCGCGTGAACACGGAGATACA	0	1.09842
FLT3LG	2323	fms-related tyrosine kinase 3 ligand	Kinase Set	TCGCTTCGTCCAGACCAACAT	0.2	0.988681
FLT3LG	2323	fms-related tyrosine kinase 3 ligand	Kinase Set	AGCCTGGAGCCCAACAACCTA	-0.19	1.02613
FLT4	2324	fms-related tyrosine kinase 4	Kinase Set	CACCGTGTGGGCTGAGTTTAA	-2.63	0.965139
FLT4	2324	fms-related tyrosine kinase 4	Kinase Set	CACGCTCTTGGTCAACAGGAA	-1.2	0.963526
FLT4	2324	fms-related tyrosine kinase 4	Kinase Set	CGCGCTGATGTCGGAGCTCAA	-0.41	1.1019
FLT4	2324	fms-related tyrosine kinase 4	Kinase Set	CCCGCTTCTGCTCGACTGCAA	0.49	1.19686
FN3K	64122	fructosamine 3 kinase	Kinase Set	CCAGCTGTTTAACTACCTGAA	-1.54	0.993088
FN3K	64122	fructosamine 3 kinase	Kinase Set	CCCAGTGTTCGTCAAAGTCAA	0	1.00756
FN3K	64122	fructosamine 3 kinase	Kinase Set	CAGATCCTTCTTCACCGCCTA	-2.24	1.01721
FN3K	64122	fructosamine 3 kinase	Kinase Set	CACCATGCGAAGGCTGCTCAA	-0.95	0.786411
FN3KRP	79672	fructosamine 3 kinase related protein	Kinase Set	CTGGAGATCATCCCAGCCTTA	-2.49	0.872998
FN3KRP	79672	fructosamine 3 kinase related protein	Kinase Set	TAGGTAGACGGAGCCACACTA	-0.14	0.950862
FN3KRP	79672	fructosamine 3 kinase related protein	Kinase Set	CCGGACTAGCTTAAGACCAAT	-1.01	0.883897
FN3KRP	79672	fructosamine 3 kinase related protein	Kinase Set	TTGGTCTGCTCTGCAGTTAAA	0	1.04478
FRK	2444	fyn-related kinase	Kinase Set	CTGGGAGTACCTAGAACCCTA	-2.27	1.03156
FRK	2444	fyn-related kinase	Kinase Set	CAGGACAGTCAAGGTGATATA	0	0.845032
FRK	2444	fyn-related kinase	Kinase Set	CAGAGCCTAAGGAACGACCTA	-0.16	0.989957
FRK	2444	fyn-related kinase	Kinase Set	AACCAGGTTCAATGGATCCAA	0.85	1.01307
FUK	197258	fucokinase	Kinase Set	TGGCTTAGAGTTGTAGACTTA	1.05	1.05558
FUK	197258	fucokinase	Kinase Set	CAGAATCATGGCGTCTACCTA	-0.06	0.960955
FUK	197258	fucokinase	Kinase Set	ATCGTGCATGTCCACTCGGAA	0.56	1.00346
FUK	197258	fucokinase	Kinase Set	AGGGAGTTGATTGGACAGTCA	0	1.11546
FYN	2534	FYN oncogene related to SRC, FGR, YES	Kinase Set	GTGGCCCTTTATGACTATGAA	0.35	1.0866
FYN	2534	FYN oncogene related to SRC, FGR, YES	Kinase Set	CTGCGATCAGCAAACATTCTA	-0.33	0.806679
FYN	2534	FYN oncogene related to SRC, FGR, YES	Kinase Set	CGCGAGAGTGAAACCACCAAA	-1.41	0.773478
FYN	2534	FYN oncogene related to SRC, FGR, YES	Kinase Set	CAGCTTGTACAACATTACTCA	0.07	0.988241
G6PC	2538	glucose-6-phosphatase, catalytic (glycogen storage disease type I, von Gierke disease)	Phosphatase Set	TAGCAGAGCAATCACCACCAA	0.48	1.0234
G6PC	2538	glucose-6-phosphatase, catalytic (glycogen storage disease type I, von Gierke disease)	Phosphatase Set	CAGCAGGTGTATACTACGTGA	0	1.06184
G6PC	2538	glucose-6-phosphatase, catalytic (glycogen storage disease type I, von Gierke disease)	Phosphatase Set	TGGGATCCAGTCAACACATTA	3.18	1.28397
G6PC	2538	glucose-6-phosphatase, catalytic (glycogen storage disease type I, von Gierke disease)	Phosphatase Set	CTGGCTTATTCCCATGTGTGA	-0.53	0.902183
G6PC2	57818	glucose-6-phosphatase, catalytic, 2	Phosphatase Set	TTGGTTAAATCTTATATTTAA	2.03	1.2283
G6PC2	57818	glucose-6-phosphatase, catalytic, 2	Phosphatase Set	CAGAGTATTCATAGCAACACA	-0.86	0.929511
G6PC2	57818	glucose-6-phosphatase, catalytic, 2	Phosphatase Set	CTGGTGGGTCCAAGAAACTCA	0	1.15973
G6PC2	57818	glucose-6-phosphatase, catalytic, 2	Phosphatase Set	TGGTTAAATCTTATATTTAAA	0.75	0.882724
G6PC3	92579	glucose 6 phosphatase, catalytic, 3	Phosphatase Set	CTGGGAAATGGCCAGAAGATA	-0.09	1.11338
G6PC3	92579	glucose 6 phosphatase, catalytic, 3	Phosphatase Set	CAGGTGCTGGCTGGCCTAATA	-1.95	0.549567
G6PC3	92579	glucose 6 phosphatase, catalytic, 3	Phosphatase Set	GTGGCTCAACCTCATCTTCAA	0	1.09453
G6PC3	92579	glucose 6 phosphatase, catalytic, 3	Phosphatase Set	CACATGTTCAGTGCCCAGGAA	-0.92	0.80634
GAK	2580	cyclin G associated kinase	Kinase Set	CCCGTGGTTGTCTGTACAGAA	-0.3	0.943842
GAK	2580	cyclin G associated kinase	Kinase Set	ACGCGTGTGACATTCAAGAAA	-0.99	0.895254
GAK	2580	cyclin G associated kinase	Kinase Set	CACGCAGTACACGGTCTTCCA	-1.56	1.04513
GAK	2580	cyclin G associated kinase	Kinase Set	ACCAGAAATCATAGACTTGTA	0	1.04949
GALK1	2584	galactokinase 1	Kinase Set	CTCCGGGAGGTACAACTGGAA	0.34	1.18934
GALK1	2584	galactokinase 1	Kinase Set	CCCGGGCGCTGGGCAAGGAAA	0	1.08161
GALK1	2584	galactokinase 1	Kinase Set	CCGCCTCATGGTGGAGAGCCA	-0.54	1.05329
GALK1	2584	galactokinase 1	Kinase Set	CAAGGGAGTGATTCAGTACTA	-0.92	0.940788
GALK2	2585	galactokinase 2	Kinase Set	ATCAATGGTACCTGCGGACAA	0.78	0.987985
GALK2	2585	galactokinase 2	Kinase Set	TGCGCGAGTGCTCCAGTTTAA	4.02	1.27192
GALK2	2585	galactokinase 2	Kinase Set	CTGGAGGAACTCCGAACCCAA	0.43	1.44616
GALK2	2585	galactokinase 2	Kinase Set	AAACTAGGGATTAGTCTAGAA	-1.52	0.860306
GCK	2645	glucokinase (hexokinase 4)	Kinase Set	CACGATGATCTCCTGCTACTA	-3.22	0.862127
GCK	2645	glucokinase (hexokinase 4)	Kinase Set	CAGCTGTATGAGAAGCTCATA	-0.41	0.82863
GCK	2645	glucokinase (hexokinase 4)	Kinase Set	CAGAAGGGAGTTGCTCACTCA	-1.83	0.844088
GCK	2645	glucokinase (hexokinase 4)	Kinase Set	CAGGACTTTGATGCATTTCCA	0	1.02507
GIT1	28964	G protein-coupled receptor kinase interacting ArfGAP 1	Kinase Set	GCCGCTGAGGATGTCCCGAAA	-1.98	1.02306
GIT1	28964	G protein-coupled receptor kinase interacting ArfGAP 1	Kinase Set	CACCTTGATCATCGACATTCT	0	1.06873
GIT1	28964	G protein-coupled receptor kinase interacting ArfGAP 1	Kinase Set	CAGAGTGACCTCGACGACCAA	-0.03	1.05062
GIT1	28964	G protein-coupled receptor kinase interacting ArfGAP 1	Kinase Set	CTCGAGCGTGCGGACAGGCAA	-2.79	0.721989
GIT2	9815	G protein-coupled receptor kinase interacting ArfGAP 2	Kinase Set	CAGCGTTGAGAGTCAAGACAA	0.83	1.08273
GIT2	9815	G protein-coupled receptor kinase interacting ArfGAP 2	Kinase Set	CCCGTTGATTATGCAAGGCAA	0	0.830213
GIT2	9815	G protein-coupled receptor kinase interacting ArfGAP 2	Kinase Set	AACGGACAGACTAGCCTTCTA	-0.06	0.846857
GIT2	9815	G protein-coupled receptor kinase interacting ArfGAP 2	Kinase Set	TTCGAGCGTGAGAACAGGGAA	1.15	0.908217
GK	2710	glycerol kinase	Kinase Set	CCACCACTTAAGTGACATAAA	0.31	1.09968
GK	2710	glycerol kinase	Kinase Set	CTGAGGGTAGCCCATTTATAA	-0.39	0.902223
GK	2710	glycerol kinase	Kinase Set	TAGGAAGAATTCGGATCCTTA	-0.9	0.867058
GK	2710	glycerol kinase	Kinase Set	ATGGGTTGGGTTACAACTCAA	-0.91	1.09539
GK2	2712	glycerol kinase 2	Kinase Set	TACGTTAGAAGAGCACTGTAA	4.49	1.13215
GK2	2712	glycerol kinase 2	Kinase Set	GACGAACTGAATATTGATATA	0.5	1.03407
GK2	2712	glycerol kinase 2	Kinase Set	CTGTGTAATACGGGTCGTAAA	5.48	1.50821
GK2	2712	glycerol kinase 2	Kinase Set	CTGGGACAAGTTAACAGGAGA	1.25	1.07028
GK5	256356	glycerol kinase 5 (putative)	Kinase Set	TACCATCTTGTACGAGCAATA	-0.05	1.02866
GK5	256356	glycerol kinase 5 (putative)	Kinase Set	AAGATTGGGCAAGAAGTCGTA	2.17	0.886453
GK5	256356	glycerol kinase 5 (putative)	Kinase Set	AACGCTCCATGAATTGGTATA	-0.09	1.10233
GK5	256356	glycerol kinase 5 (putative)	Kinase Set	CAGAACTTGACTGAGGTGCAA	-2.54	0.90052
GKAP1	80318	G kinase anchoring protein 1	Kinase Set	AACGCTCAACATGATCTTCCA	-0.26	0.976712
GKAP1	80318	G kinase anchoring protein 1	Kinase Set	CTGCAAGTTGATGAATCACAA	2.63	1.23419
GKAP1	80318	G kinase anchoring protein 1	Kinase Set	CCAGCGCAATTTCTTTCTCTA	4.42	1.18326
GKAP1	80318	G kinase anchoring protein 1	Kinase Set	TTCATTCGGAAGATCACATTA	-0.27	0.962723
GNE	10020	glucosamine (UDP-N-acetyl)-2-epimerase/N-acetylmannosamine kinase	Kinase Set	ATGAAGGTTTCTACAACATAT	0.61	0.804974
GNE	10020	glucosamine (UDP-N-acetyl)-2-epimerase/N-acetylmannosamine kinase	Kinase Set	CACCTGATAGATGACTATGGA	0.95	0.88101
GNE	10020	glucosamine (UDP-N-acetyl)-2-epimerase/N-acetylmannosamine kinase	Kinase Set	ACCAGTATAGTATTTGGTCTA	-0.8	0.958989
GNE	10020	glucosamine (UDP-N-acetyl)-2-epimerase/N-acetylmannosamine kinase	Kinase Set	AAGGAGATTAACTGTCCCAAA	-0.26	0.974809
GRK1	6011	G protein-coupled receptor kinase 1	Kinase Set	CTGGAAAGACATCGAGGACTA	-0.72	0.972968
GRK1	6011	G protein-coupled receptor kinase 1	Kinase Set	CCAGATGAAGGCGACCGGCAA	-3.63	0.598176
GRK1	6011	G protein-coupled receptor kinase 1	Kinase Set	CAGAGATGAGACCTGCGACAA	-0.28	0.936593
GRK1	6011	G protein-coupled receptor kinase 1	Kinase Set	AGGGATGTGTCTGGTTTCCTA	-1.59	0.826789
GRK4	2868	G protein-coupled receptor kinase 4	Kinase Set	CAGGATGTTACTCACCAAGAA	-1.13	0.887862
GRK4	2868	G protein-coupled receptor kinase 4	Kinase Set	CACCGCAGATGAAGACTTCTA	1.37	1.01489
GRK4	2868	G protein-coupled receptor kinase 4	Kinase Set	CAGGGACATTCTCCATTCAAA	-0.29	0.925888
GRK4	2868	G protein-coupled receptor kinase 4	Kinase Set	AAGAGTTGGAACAGTCGGCTA	-0.72	0.9713
GRK5	2869	G protein-coupled receptor kinase 5	Kinase Set	AGCGTCATAACTAGAACTGAA	0.11	0.958069
GRK5	2869	G protein-coupled receptor kinase 5	Kinase Set	CAGGAATAATGCGGTAGGCAA	-1.95	0.989408
GRK5	2869	G protein-coupled receptor kinase 5	Kinase Set	CAGGTTCGGGCCACGGGTAAA	1.81	1.13969
GRK5	2869	G protein-coupled receptor kinase 5	Kinase Set	CCGAAGGACCATAGACAGAGA	-0.12	0.960734
GRK6	2870	G protein-coupled receptor kinase 6	Kinase Set	AAGGATGTTCTGGACATTGAA	-4.04	0.856701
GRK6	2870	G protein-coupled receptor kinase 6	Kinase Set	AGGCATGTGGGCGGCAGCTAA	0.93	1.11527
GRK6	2870	G protein-coupled receptor kinase 6	Kinase Set	CAGAGACTCTTCAGTCGCCAA	-0.67	0.963388
GRK6	2870	G protein-coupled receptor kinase 6	Kinase Set	AGCGAACACGGTGCTACTCAA	-0.46	0.741357
GRK7	131890	G protein-coupled receptor kinase 7	Kinase Set	TACGGGTTGTGAGGAGGGTAA	0.32	1.04817
GRK7	131890	G protein-coupled receptor kinase 7	Kinase Set	CAGTGTCAGACAAGTACTTCA	0	0.958917
GRK7	131890	G protein-coupled receptor kinase 7	Kinase Set	CAGGCTCTTCTTGGCTAAGAA	2.19	1.22475
GRK7	131890	G protein-coupled receptor kinase 7	Kinase Set	TGGGAAGATGTATGCCTGTAA	-0.49	0.972723
GSK3A	2931	glycogen synthase kinase 3 alpha	Kinase Set	CCGGGTGTAAATAGATTGTTA	0.16	1.04928
GSK3A	2931	glycogen synthase kinase 3 alpha	Kinase Set	CAGGGAACTAGTCGCCATCAA	-1.87	0.832282
GSK3A	2931	glycogen synthase kinase 3 alpha	Kinase Set	CAAAGGTGTTCAAATCTCGAA	-0.61	0.924031
GSK3A	2931	glycogen synthase kinase 3 alpha	Kinase Set	CACGGAGTTCAAGTTCCCTCA	-1.62	0.918845
GSK3B	2932	glycogen synthase kinase 3 beta	Kinase Set	CCCAAATGTCAAACTACCAAA	0.44	1.01793
GSK3B	2932	glycogen synthase kinase 3 beta	Kinase Set	AACACTGGTCACGTTTGGAAA	0.03	0.949671
GSK3B	2932	glycogen synthase kinase 3 beta	Kinase Set	CTGCATTTATCGTTAACCTAA	5.48	1.38866
GSK3B	2932	glycogen synthase kinase 3 beta	Kinase Set	AAGCTAGATCACTGTAACATA	-0.26	0.846481
GUCY2C	2984	guanylate cyclase 2C (heat stable enterotoxin receptor)	Kinase Set	CTCAAGATCGATGATGACAAA	-3.66	0.957171
GUCY2C	2984	guanylate cyclase 2C (heat stable enterotoxin receptor)	Kinase Set	CCAGGAATCTATCACCAACAA	0.02	1.07176
GUCY2C	2984	guanylate cyclase 2C (heat stable enterotoxin receptor)	Kinase Set	ACCCACGTAAATAAGACCTAT	-2.15	0.96948
GUCY2C	2984	guanylate cyclase 2C (heat stable enterotoxin receptor)	Kinase Set	AACCAACGATCTGCCCTTCAA	-0.47	1.09832
GUCY2D	3000	guanylate cyclase 2D, membrane (retina-specific)	Kinase Set	CACCGGCTACTTCACATGCAA	-0.93	0.943144
GUCY2D	3000	guanylate cyclase 2D, membrane (retina-specific)	Kinase Set	CTGGACCTTATCAAGGGAATA	0.03	0.945028
GUCY2D	3000	guanylate cyclase 2D, membrane (retina-specific)	Kinase Set	CCGGGCCAGTTCTCTTGAGAA	-0.71	0.955174
GUCY2D	3000	guanylate cyclase 2D, membrane (retina-specific)	Kinase Set	CTGGTTCGATCCAAACAACAT	-5.4	0.876675
GUK1	2987	guanylate kinase 1	Kinase Set	CCCGGCGAGGAGAACGGCAAA	0.32	1.05688
GUK1	2987	guanylate kinase 1	Kinase Set	CTGCGGCAGCGCAACACTGAA	0.58	1.04316
GUK1	2987	guanylate kinase 1	Kinase Set	CACGAGCAAGGTGGCGGTGCA	-2.58	0.965449
GUK1	2987	guanylate kinase 1	Kinase Set	CAGGGAGGTGATGCAGCGTGA	-0.76	0.804273
HCK	3055	hemopoietic cell kinase	Kinase Set	CCGGGATAGCGAGACCACTAA	-0.78	0.965233
HCK	3055	hemopoietic cell kinase	Kinase Set	CGGCAGGGAGATACCGTGAAA	2.34	1.08787
HCK	3055	hemopoietic cell kinase	Kinase Set	CGGGAGCACATCAGAGGCTTA	0	1.15807
HCK	3055	hemopoietic cell kinase	Kinase Set	AACGACGGGCTCTGCCAGAAA	1.22	0.853359
HGS	9146	hepatocyte growth factor-regulated tyrosine kinase substrate	Kinase Set	CCGGAACGAGCCCAAGTACAA	1.24	1.17059
HGS	9146	hepatocyte growth factor-regulated tyrosine kinase substrate	Kinase Set	GCACGTCTTTCCAGAATTCAA	-0.46	0.989288
HGS	9146	hepatocyte growth factor-regulated tyrosine kinase substrate	Kinase Set	CACGTCCGGAGTAACACTACA	-0.18	1.25277
HGS	9146	hepatocyte growth factor-regulated tyrosine kinase substrate	Kinase Set	CAGAATGGTACAGCGATAATA	-0.71	0.844007
HIPK1	204851	homeodomain interacting protein kinase 1	Kinase Set	AGGGAAGCTGTACACCACTAA	-0.18	0.993924
HIPK1	204851	homeodomain interacting protein kinase 1	Kinase Set	CAAGCGGAGGGTTCACATGTA	0.05	0.765551
HIPK1	204851	homeodomain interacting protein kinase 1	Kinase Set	CAGGAGTTCTCACGCAGGGAA	0.36	1.16233
HIPK1	204851	homeodomain interacting protein kinase 1	Kinase Set	CCCACAGGGTATCGAGCTCAA	2	1.0222
HIPK2	28996	homeodomain interacting protein kinase 2	Kinase Set	ACGGGTCGGGACACCAGTGAA	-1.72	0.824108
HIPK2	28996	homeodomain interacting protein kinase 2	Kinase Set	CCGAGTCAGTATCCAGCCCAA	-2.91	0.914167
HIPK2	28996	homeodomain interacting protein kinase 2	Kinase Set	AAGCGTCGGGTGAATATGTAT	0.81	1.01321
HIPK2	28996	homeodomain interacting protein kinase 2	Kinase Set	CCAGGTGAACATGACGACAGA	-0.73	1.03065
HIPK3	10114	homeodomain interacting protein kinase 3	Kinase Set	CTCATTCTGGTTGGAGATTAA	0.87	1.16732
HIPK3	10114	homeodomain interacting protein kinase 3	Kinase Set	TTGGATAATCATAGCAGCGCA	0.14	0.952695
HIPK3	10114	homeodomain interacting protein kinase 3	Kinase Set	CTCCGTGTACCTCAAGACCTA	0.08	1.27048
HIPK3	10114	homeodomain interacting protein kinase 3	Kinase Set	CACGGACCTATGTGAATGGTA	0.75	1.15979
HIPK4	147746	homeodomain interacting protein kinase 4	Kinase Set	CAGCGAGGTGCGCTACGTGAA	0.07	1.11513
HIPK4	147746	homeodomain interacting protein kinase 4	Kinase Set	CAGGGTCAAGGTGATTGACTT	0.05	1.07958
HIPK4	147746	homeodomain interacting protein kinase 4	Kinase Set	CTGCCTCTGTCTATTTCAATA	0.14	1.17861
HIPK4	147746	homeodomain interacting protein kinase 4	Kinase Set	AACCCACAAATTATTCTTACA	0	1.16009
HK1	3098	hexokinase 1	Kinase Set	CCGTGTCGTATGACCTAGTAA	-2.04	0.743004
HK1	3098	hexokinase 1	Kinase Set	CACGATGTAGTCACCTTACTA	-6.13	0.772524
HK1	3098	hexokinase 1	Kinase Set	TTGGTGGGTCTTCCTTTCGAA	0	1.31136
HK1	3098	hexokinase 1	Kinase Set	AAGGAGGGCCTCTTATTTGAA	0	0.970212
HK2	3099	hexokinase 2	Kinase Set	CGGCCGTGCTACAATAGGTAA	0.99	1.09943
HK2	3099	hexokinase 2	Kinase Set	CACGATGAAATTGAACCTGGT	-2.03	0.638813
HK2	3099	hexokinase 2	Kinase Set	ACCGGTCGCTTTGAGACCAAA	0.55	1.03847
HK2	3099	hexokinase 2	Kinase Set	TTGGGTGAAAGTAACGGACAA	0	0.900537
HK3	3101	hexokinase 3 (white cell)	Kinase Set	CCGGAATGCGATGTCTCCTTA	-0.55	1.06142
HK3	3101	hexokinase 3 (white cell)	Kinase Set	CACGGGCACCAACGCGTGTTA	0.42	1.05811
HK3	3101	hexokinase 3 (white cell)	Kinase Set	GTGCCTCATATTGCCAGACAA	-0.03	1.08928
HK3	3101	hexokinase 3 (white cell)	Kinase Set	AGCACTCAGGTTAGCAATATA	0	0.870546
HSPB8	26353	heat shock 22kDa protein 8	Kinase Set	CCGCATGGTTTGGTTAATGAA	0	1.1266
HSPB8	26353	heat shock 22kDa protein 8	Kinase Set	CTGGTTCATCACCTCCGAATA	-1.8	0.990421
HSPB8	26353	heat shock 22kDa protein 8	Kinase Set	TTCCACATTAGCACTCCCTAA	-0.69	0.953609
HSPB8	26353	heat shock 22kDa protein 8	Kinase Set	ATGGGTGATATACAGGTCTTA	0	1.01558
HUNK	30811	hormonally up-regulated Neu-associated kinase	Kinase Set	CACGGGCAAAGTGCCCTGTAA	-1.74	0.836032
HUNK	30811	hormonally up-regulated Neu-associated kinase	Kinase Set	TACGTTGCAAATAATAGTACA	-0.03	0.97122
HUNK	30811	hormonally up-regulated Neu-associated kinase	Kinase Set	CCCTGTAGTTACTGACAGAAA	0.55	1.03242
HUNK	30811	hormonally up-regulated Neu-associated kinase	Kinase Set	CAGCTGCACATGTGCCGCTAA	0	1.14483
IBTK	25998	inhibitor of Bruton agammaglobulinemia tyrosine kinase	Kinase Set	TAGAAGAGTCATTACACCATA	6.44	1.4823
IBTK	25998	inhibitor of Bruton agammaglobulinemia tyrosine kinase	Kinase Set	CAGATTGAGGAGCATGCCATA	-0.1	0.83216
IBTK	25998	inhibitor of Bruton agammaglobulinemia tyrosine kinase	Kinase Set	AAGCATGGTGTTAGTCTGTAT	0.77	1.02622
IBTK	25998	inhibitor of Bruton agammaglobulinemia tyrosine kinase	Kinase Set	AGCCACGTAAACGTTCAGATA	-0.78	0.928282
ICK	22858	intestinal cell (MAK-like) kinase	Kinase Set	TTCCACCTAATCCATGGTCTA	1.07	1.04844
ICK	22858	intestinal cell (MAK-like) kinase	Kinase Set	CAGAAGTACTCCTGAGGTCTA	2.04	1.06751
ICK	22858	intestinal cell (MAK-like) kinase	Kinase Set	AAGAAATGGCATACTCTCGAA	-0.41	1.01089
ICK	22858	intestinal cell (MAK-like) kinase	Kinase Set	CTGAGTCTGCTATAAGGAATA	0.28	1.0935
IKBKAP	8518	inhibitor of kappa light polypeptide gene enhancer in B-cells, kinase complex-associated protein	Kinase Set	CAGCGGTTTACTATAGACAAA	-1.57	0.951902
IKBKAP	8518	inhibitor of kappa light polypeptide gene enhancer in B-cells, kinase complex-associated protein	Kinase Set	AGGGATCCTGACGGGAATAAA	-1.09	0.946067
IKBKAP	8518	inhibitor of kappa light polypeptide gene enhancer in B-cells, kinase complex-associated protein	Kinase Set	TCCCATAGTAACTCCAGGATA	0.05	1.08405
IKBKAP	8518	inhibitor of kappa light polypeptide gene enhancer in B-cells, kinase complex-associated protein	Kinase Set	ATCATGCGAAATCTGAAATTA	2.35	1.19826
IKBKB	3551	inhibitor of kappa light polypeptide gene enhancer in B-cells, kinase beta	Kinase Set	CTGGAGAAGTACAGCGAGCAA	0	1.07251
IKBKB	3551	inhibitor of kappa light polypeptide gene enhancer in B-cells, kinase beta	Kinase Set	AAACCGAGTTTGGGATCACAT	-0.66	0.893529
IKBKB	3551	inhibitor of kappa light polypeptide gene enhancer in B-cells, kinase beta	Kinase Set	CAGACCGACATTGTGGACTTA	1.47	1.21352
IKBKB	3551	inhibitor of kappa light polypeptide gene enhancer in B-cells, kinase beta	Kinase Set	TAGGGAGCTATTCATGTTTCA	0.25	1.1256
IKBKE	9641	inhibitor of kappa light polypeptide gene enhancer in B-cells, kinase epsilon	Kinase Set	CCGCATCATCGAACGGCTAAA	0.32	1.03473
IKBKE	9641	inhibitor of kappa light polypeptide gene enhancer in B-cells, kinase epsilon	Kinase Set	CAAGATGAACTTCATCTACAA	-2.44	0.831723
IKBKE	9641	inhibitor of kappa light polypeptide gene enhancer in B-cells, kinase epsilon	Kinase Set	ACGGCGGAACAAGGAGATCAT	-1.58	0.958963
IKBKE	9641	inhibitor of kappa light polypeptide gene enhancer in B-cells, kinase epsilon	Kinase Set	CAGAAGCATCCAGCAGATTCA	0.97	1.08265
IKBKG	8517	inhibitor of kappa light polypeptide gene enhancer in B-cells, kinase gamma	Kinase Set	CAAACAGGAGGTGATCGATAA	0	1.0477
IKBKG	8517	inhibitor of kappa light polypeptide gene enhancer in B-cells, kinase gamma	Kinase Set	TCGCTTGGAGGCTGCCACTAA	-0.25	1.05464
IKBKG	8517	inhibitor of kappa light polypeptide gene enhancer in B-cells, kinase gamma	Kinase Set	CTGCAGAGGGAGTACAGCAAA	-3.67	0.98867
IKBKG	8517	inhibitor of kappa light polypeptide gene enhancer in B-cells, kinase gamma	Kinase Set	CAGGATCGAGGACATGAGGAA	0.34	0.831577
ILK	3611	integrin-linked kinase	Kinase Set	TAGCCGTAGTGTAATGATTGA	-0.26	1.08314
ILK	3611	integrin-linked kinase	Kinase Set	AAGGAAGAGCAGGGACTTCAA	-3.53	0.964112
ILK	3611	integrin-linked kinase	Kinase Set	ACAGCTTAACTTCCTGACGAA	-0.97	0.9816
ILK	3611	integrin-linked kinase	Kinase Set	ACAGAAGCTATTGCAGTACAA	-0.05	1.00759
ILKAP	80895	integrin-linked kinase-associated serine/threonine phosphatase 2C	Phosphatase Set	TTCGGTGATCTTTGGTCTGAA	0	1.11699
ILKAP	80895	integrin-linked kinase-associated serine/threonine phosphatase 2C	Phosphatase Set	ATGGAGGAATTCGAGCCTCAA	2.36	1.02783
ILKAP	80895	integrin-linked kinase-associated serine/threonine phosphatase 2C	Phosphatase Set	CCCGCTAGCAGTGGCGATTCA	0.23	1.12687
ILKAP	80895	integrin-linked kinase-associated serine/threonine phosphatase 2C	Phosphatase Set	TCGGGCAATCTTGTGTCGTTA	0	0.830213
IMPA1	3612	inositol(myo)-1(or 4)-monophosphatase 1	Phosphatase Set	CCAGATTTGGTGACTCATCAA	0.18	1.15267
IMPA1	3612	inositol(myo)-1(or 4)-monophosphatase 1	Phosphatase Set	ACGAAGAGTAATTGCTGCAAA	0.19	1.02683
IMPA1	3612	inositol(myo)-1(or 4)-monophosphatase 1	Phosphatase Set	CCGGAAGAGACGAGTGCGGTA	-2.63	0.951115
IMPA1	3612	inositol(myo)-1(or 4)-monophosphatase 1	Phosphatase Set	TAGAAAGTTAACTGTTTGGAA	0.06	0.943496
INPP1	3628	inositol polyphosphate-1-phosphatase	Phosphatase Set	CACCAGCAGCTGCAACTGAAA	-1.02	1.00884
INPP1	3628	inositol polyphosphate-1-phosphatase	Phosphatase Set	CCGTAATTAGTACAAGTGAAA	0	1.03223
INPP1	3628	inositol polyphosphate-1-phosphatase	Phosphatase Set	TAGATTCAACTTATCAGTATA	2.11	1.20562
INPP1	3628	inositol polyphosphate-1-phosphatase	Phosphatase Set	CTGATGGGAGTCATCAATCAA	3.75	1.05355
INPP4B	8821	inositol polyphosphate-4-phosphatase, type II, 105kDa	Phosphatase Set	CTCCATAGATTTGAAACAGAA	0.3	1.09179
INPP4B	8821	inositol polyphosphate-4-phosphatase, type II, 105kDa	Phosphatase Set	AACGATTTGCCGCAAACTGAA	1.27	1.40896
INPP4B	8821	inositol polyphosphate-4-phosphatase, type II, 105kDa	Phosphatase Set	CCCGGAAAGTGTGAGCGGAAA	0.4	1.07324
INPP4B	8821	inositol polyphosphate-4-phosphatase, type II, 105kDa	Phosphatase Set	ATCGATGTCAGTGACACTTGA	-0.85	0.849105
INPP5A	3632	inositol polyphosphate-5-phosphatase, 40kDa	Phosphatase Set	CGAGTGCAAATGGTCAAGAAA	-1.62	1.01244
INPP5A	3632	inositol polyphosphate-5-phosphatase, 40kDa	Phosphatase Set	CGGAAGGTTATGCTCCAGTTA	0.37	1.12943
INPP5A	3632	inositol polyphosphate-5-phosphatase, 40kDa	Phosphatase Set	TCGAGTGATGCGATGAAAGAA	-0.27	1.10693
INPP5A	3632	inositol polyphosphate-5-phosphatase, 40kDa	Phosphatase Set	AACAATAATATCATGGGAGAA	-0.89	0.896439
INPP5B	3633	inositol polyphosphate-5-phosphatase, 75kDa	Phosphatase Set	CTGCGAGATACAATTGTGAAA	2.02	1.15907
INPP5B	3633	inositol polyphosphate-5-phosphatase, 75kDa	Phosphatase Set	TTGCGGGAACATACAATGTAA	-0.32	1.00316
INPP5B	3633	inositol polyphosphate-5-phosphatase, 75kDa	Phosphatase Set	AAGAAGAGGATTACACCTATA	2.84	1.25975
INPP5B	3633	inositol polyphosphate-5-phosphatase, 75kDa	Phosphatase Set	GAGGGCAATACAGGCATTTAA	2.89	1.04134
INPP5D	3635	inositol polyphosphate-5-phosphatase, 145kDa	Phosphatase Set	TCGGAATTGCGTTTACACTTA	-2.43	1.02993
INPP5D	3635	inositol polyphosphate-5-phosphatase, 145kDa	Phosphatase Set	CAGGTGCTATGCCACATTGAA	-1.88	0.96386
INPP5D	3635	inositol polyphosphate-5-phosphatase, 145kDa	Phosphatase Set	TCCCATCAACATGGTGTCCAA	0.27	1.05056
INPP5D	3635	inositol polyphosphate-5-phosphatase, 145kDa	Phosphatase Set	CCCGGGACTGTTGACAGCCAA	3.14	0.984222
INPP5E	56623	inositol polyphosphate-5-phosphatase, 72 kDa	Phosphatase Set	CAGAAATGTGCCCGACACCAA	-2.8	0.937397
INPP5E	56623	inositol polyphosphate-5-phosphatase, 72 kDa	Phosphatase Set	ACGCATCGTGTCTCAGATCAA	-1.31	0.930166
INPP5E	56623	inositol polyphosphate-5-phosphatase, 72 kDa	Phosphatase Set	ACGGATTTCGAAGGAGATTCA	-3.69	0.846742
INPP5E	56623	inositol polyphosphate-5-phosphatase, 72 kDa	Phosphatase Set	CACGTACGACAGCACCTCCAA	0.11	0.833665
INPP5F	22876	inositol polyphosphate-5-phosphatase F	Phosphatase Set	TACCATCTCCTGATGACTCAA	1.07	1.25841
INPP5F	22876	inositol polyphosphate-5-phosphatase F	Phosphatase Set	AAGACCTTTACGCATATTAAA	0.85	1.11863
INPP5F	22876	inositol polyphosphate-5-phosphatase F	Phosphatase Set	CAGATCTTCCATGGTGGCTTA	-2.43	0.898273
INPP5F	22876	inositol polyphosphate-5-phosphatase F	Phosphatase Set	CTGAAATAATGTGTTTCTGAA	-1.55	0.827403
IP6K1	9807	inositol hexakisphosphate kinase 1	Kinase Set	AAGGTGGATGTCCGCATGATT	0.57	1.02286
IP6K1	9807	inositol hexakisphosphate kinase 1	Kinase Set	CCGGTCTGAGATGCGTCTCAA	-2.39	0.865699
IP6K1	9807	inositol hexakisphosphate kinase 1	Kinase Set	TAGGGTGGAGGGTAAGACATA	-0.13	1.01833
IP6K1	9807	inositol hexakisphosphate kinase 1	Kinase Set	GCCCTGCTGATTGTAAGGTAA	-0.09	0.994396
IP6K2	51447	inositol hexakisphosphate kinase 2	Kinase Set	CTGCTGAGATGCGCAAATTCA	1.53	1.14213
IP6K2	51447	inositol hexakisphosphate kinase 2	Kinase Set	CCCAAGGGAACATCAGTTCTA	-1.23	0.75776
IP6K2	51447	inositol hexakisphosphate kinase 2	Kinase Set	ACGGACAAACAACAGACAGAA	0.84	1.12989
IP6K2	51447	inositol hexakisphosphate kinase 2	Kinase Set	TAGGACGGAAACGCCGAGGAA	0.11	1.02301
IP6K3	117283	inositol hexakisphosphate kinase 3	Kinase Set	CTGAGATACGTTACCCAATTA	0.09	0.918058
IP6K3	117283	inositol hexakisphosphate kinase 3	Kinase Set	AAGACTGGTGGACAAGTGTAA	0	1.01233
IP6K3	117283	inositol hexakisphosphate kinase 3	Kinase Set	CTGCGCTATGACAGCAATAAA	-0.58	1.05101
IP6K3	117283	inositol hexakisphosphate kinase 3	Kinase Set	CTCCGAGTACCCAGAGAACAA	2.9	1.14164
IRAK1	3654	interleukin-1 receptor-associated kinase 1	Kinase Set	CCAGGTTGTCCTTGAGTAATA	-0.5	0.936596
IRAK1	3654	interleukin-1 receptor-associated kinase 1	Kinase Set	AAGCAAGTCAGGTTTCATGTA	-1.63	0.902372
IRAK1	3654	interleukin-1 receptor-associated kinase 1	Kinase Set	CTGGGTCATGTGCCGCTTCTA	0.24	0.999642
IRAK1	3654	interleukin-1 receptor-associated kinase 1	Kinase Set	TACCTGCTTACAATTTGGAAA	-0.42	0.989966
IRAK1BP1	134728	interleukin-1 receptor-associated kinase 1 binding protein 1	Kinase Set	CAGAGGTCTGCATTACATTTA	0.07	0.99573
IRAK1BP1	134728	interleukin-1 receptor-associated kinase 1 binding protein 1	Kinase Set	AAGAGCGTTTGTCGCCGTCTA	-2.81	0.881015
IRAK1BP1	134728	interleukin-1 receptor-associated kinase 1 binding protein 1	Kinase Set	AACCTTGTTGGCCAAACCTTA	1.88	1.19247
IRAK1BP1	134728	interleukin-1 receptor-associated kinase 1 binding protein 1	Kinase Set	CGGCCGGTAGTTACTATGGAA	-1.68	0.747329
IRAK2	3656	interleukin-1 receptor-associated kinase 2	Kinase Set	CAGCAACGTCAAGAGCTCTAA	0.53	1.14368
IRAK2	3656	interleukin-1 receptor-associated kinase 2	Kinase Set	CCAGATCATCCTGAACTGGAA	0.69	0.876728
IRAK2	3656	interleukin-1 receptor-associated kinase 2	Kinase Set	CTGGATGGAGTTCGCCTCCTA	-1.02	1.04032
IRAK2	3656	interleukin-1 receptor-associated kinase 2	Kinase Set	CCGGTTTACCTGAAGGACTTA	-0.11	1.08749
IRAK3	11213	interleukin-1 receptor-associated kinase 3	Kinase Set	CACATTCGAATCGGTATATTA	-0.64	1.01286
IRAK3	11213	interleukin-1 receptor-associated kinase 3	Kinase Set	CTGGATGTTCGTCATATTGAA	5.77	1.2875
IRAK3	11213	interleukin-1 receptor-associated kinase 3	Kinase Set	CTGCAACGCGGGCAAAGTTAA	0.17	1.05678
IRAK3	11213	interleukin-1 receptor-associated kinase 3	Kinase Set	CTGCGGGATCTCCTTAGAGAA	-0.36	0.981803
IRAK4	51135	interleukin-1 receptor-associated kinase 4	Kinase Set	TTGCAGGACAGTGGTTATTAA	-0.09	0.926303
IRAK4	51135	interleukin-1 receptor-associated kinase 4	Kinase Set	AACACCGTGAACCTCAGTTAT	0.06	1.07102
IRAK4	51135	interleukin-1 receptor-associated kinase 4	Kinase Set	CAGCTTAGAAGAGTACTCCAA	1.88	1.2601
IRAK4	51135	interleukin-1 receptor-associated kinase 4	Kinase Set	TTGTATATAAAGGCTACGTAA	0.38	0.929407
ITK	3702	IL2-inducible T-cell kinase	Kinase Set	CTGGTGAGTTAAGTAAGATTA	-2.09	0.987937
ITK	3702	IL2-inducible T-cell kinase	Kinase Set	CAGGACTTTAGTAGAGACTGA	-2.15	0.860117
ITK	3702	IL2-inducible T-cell kinase	Kinase Set	CAGCATCCCATGCCACTATAA	-0.15	0.923948
ITK	3702	IL2-inducible T-cell kinase	Kinase Set	CACCAAGGCTGTTGTAAGTGA	0.6	1.05075
ITPA	3704	inosine triphosphatase (nucleoside triphosphate pyrophosphatase)	Phosphatase Set	CAGGAGGCAGTTCGCCAGGTA	-2.85	0.973349
ITPA	3704	inosine triphosphatase (nucleoside triphosphate pyrophosphatase)	Phosphatase Set	CTGGAGAAGTTAAAGCCTGAA	-3.31	0.884749
ITPA	3704	inosine triphosphatase (nucleoside triphosphate pyrophosphatase)	Phosphatase Set	CTGGATGAGACTTGTTTCCAA	1.09	1.19737
ITPA	3704	inosine triphosphatase (nucleoside triphosphate pyrophosphatase)	Phosphatase Set	GAGGAGGTCGTTCAGATTCTA	-2.93	0.911285
ITPK1	3705	inositol 1,3,4-triphosphate 5/6 kinase	Kinase Set	CACGCCGTCATTGACATCAAT	2.11	1.0712
ITPK1	3705	inositol 1,3,4-triphosphate 5/6 kinase	Kinase Set	CGAGATGGCTATCGTGTTCAA	-3.27	0.887446
ITPK1	3705	inositol 1,3,4-triphosphate 5/6 kinase	Kinase Set	CTGACTGACGTCATCCTTGAA	-0.08	0.953587
ITPK1	3705	inositol 1,3,4-triphosphate 5/6 kinase	Kinase Set	AACTGAGGACCCAACAACTAA	-7.31	0.602126
ITPKA	3706	inositol 1,4,5-trisphosphate 3-kinase A	Kinase Set	CACCAGCGGGCTGATCCTGAA	-0.55	0.923382
ITPKA	3706	inositol 1,4,5-trisphosphate 3-kinase A	Kinase Set	CCGGTCTAACGTCTCACACCA	1.79	1.01569
ITPKA	3706	inositol 1,4,5-trisphosphate 3-kinase A	Kinase Set	CCCAGCGTTCCCAGAGCCAAA	-0.67	0.844887
ITPKA	3706	inositol 1,4,5-trisphosphate 3-kinase A	Kinase Set	CGGCGTGTGGCTCATCGACTT	-0.67	0.955668
ITPKB	3707	inositol 1,4,5-trisphosphate 3-kinase B	Kinase Set	AAGGCCATTCGAACCACTCTA	-2.27	0.768324
ITPKB	3707	inositol 1,4,5-trisphosphate 3-kinase B	Kinase Set	CAGAGGGAGACTATGGACCAA	-0.27	1.02813
ITPKB	3707	inositol 1,4,5-trisphosphate 3-kinase B	Kinase Set	CCACATGTTGACTGTGAGCAA	0.05	1.29742
ITPKB	3707	inositol 1,4,5-trisphosphate 3-kinase B	Kinase Set	TACCGTGCTAGTTCTCTTCTA	-1.9	0.903254
ITPKC	80271	inositol 1,4,5-trisphosphate 3-kinase C	Kinase Set	CAGAAGGAGCCTGTCCCTCAA	0.17	0.967455
ITPKC	80271	inositol 1,4,5-trisphosphate 3-kinase C	Kinase Set	CAGGACCTATCTGGAAGAGGA	0.8	1.0379
ITPKC	80271	inositol 1,4,5-trisphosphate 3-kinase C	Kinase Set	TCGGCCGAAGCCCGAACCGAA	0.33	1.05071
ITPKC	80271	inositol 1,4,5-trisphosphate 3-kinase C	Kinase Set	CTGGATGATAGACTTCGGCAA	0.73	1.18696
JAK1	3716	Janus kinase 1	Kinase Set	CACGGATAACATCAGCTTCAT	0.2	0.984098
JAK1	3716	Janus kinase 1	Kinase Set	ACCGGATGAGGTTCTATTTCA	0.06	0.963141
JAK1	3716	Janus kinase 1	Kinase Set	TACAAGCGATATATTCCAGAA	-1.97	0.889325
JAK1	3716	Janus kinase 1	Kinase Set	CCCGTTGATCGTCCACAACAT	0.21	1.12953
JAK2	3717	Janus kinase 2	Kinase Set	AGCCATCATACGAGATCTTAA	0.67	1.07449
JAK2	3717	Janus kinase 2	Kinase Set	CTGCCTTACGATGACAGAAAT	0.99	1.10704
JAK2	3717	Janus kinase 2	Kinase Set	AACGAGAAATATATTGGTGGA	2.22	1.36893
JAK2	3717	Janus kinase 2	Kinase Set	ATGATTGGCAATGACAAACAA	0	0.944918
JAK3	3718	Janus kinase 3	Kinase Set	TCCGGGAGGCGCAGACACTTA	0	1.06629
JAK3	3718	Janus kinase 3	Kinase Set	CGGGAGATTCAGATCCTCAAA	-0.25	0.941704
JAK3	3718	Janus kinase 3	Kinase Set	AGGCCTTATGAGGGTCCTCTA	-0.04	1.22154
JAK3	3718	Janus kinase 3	Kinase Set	TGGGTCCTTCACCAAGATTTA	-0.9	1.07944
JAKMIP1	152789	Janus kinase and microtubule interacting protein 1	Kinase Set	CGCGACTGCCATCCTCCTCAA	0.26	1.14971
JAKMIP1	152789	Janus kinase and microtubule interacting protein 1	Kinase Set	AACGTTGTCCGAAACATCCTA	2.81	0.996401
JAKMIP1	152789	Janus kinase and microtubule interacting protein 1	Kinase Set	CTGTTAGAATTCAGAGTGCTA	0.16	0.98559
JAKMIP1	152789	Janus kinase and microtubule interacting protein 1	Kinase Set	ATGTGAGGCGATTTCAACTAA	-0.01	0.966929
KALRN	8997	kalirin, RhoGEF kinase	Kinase Set	CCCATTGAGTATCAACGGAAA	0.91	1.00576
KALRN	8997	kalirin, RhoGEF kinase	Kinase Set	CCCATTGAGTATCAACGGAAA	2.1	1.03382
KALRN	8997	kalirin, RhoGEF kinase	Kinase Set	CAGGACATCAATCAAGTCTTA	-0.27	1.19673
KALRN	8997	kalirin, RhoGEF kinase	Kinase Set	CAGGACATCAATCAAGTCTTA	0.39	0.997606
KALRN	8997	kalirin, RhoGEF kinase	Kinase Set	CCCGAAGTCGCTGATCCGGAA	0.05	1.06944
KALRN	8997	kalirin, RhoGEF kinase	Kinase Set	CCCGAAGTCGCTGATCCGGAA	2.57	1.01006
KALRN	8997	kalirin, RhoGEF kinase	Kinase Set	CACGGAGATCGGAGTCAGCTA	0	1.17564
KALRN	8997	kalirin, RhoGEF kinase	Kinase Set	CACGGAGATCGGAGTCAGCTA	0.24	1.05102
KDR	3791	kinase insert domain receptor (a type III receptor tyrosine kinase)	Kinase Set	AACGCTGACATGTACGGTCTA	-0.2	0.817408
KDR	3791	kinase insert domain receptor (a type III receptor tyrosine kinase)	Kinase Set	AAGGCTAATACAACTCTTCAA	-0.05	0.903422
KDR	3791	kinase insert domain receptor (a type III receptor tyrosine kinase)	Kinase Set	TACCAGTACGGCACCACTCAA	-1.34	0.9851
KDR	3791	kinase insert domain receptor (a type III receptor tyrosine kinase)	Kinase Set	CAGGCTGATCCTTTATTCAGA	2.22	1.1336
KHK	3795	ketohexokinase (fructokinase)	Kinase Set	TAGGGTGGGTAAGGCCTTATA	1.3	1.01805
KHK	3795	ketohexokinase (fructokinase)	Kinase Set	AGACGTGGTGTTTGTCAGCAA	0.08	0.782817
KHK	3795	ketohexokinase (fructokinase)	Kinase Set	AAGGGCGTGCCTCAGCCACAA	-1.99	0.977977
KHK	3795	ketohexokinase (fructokinase)	Kinase Set	CCCAGTGAACCTGCCAAAGAA	-0.11	0.918586
KIAA1804	84451	mixed lineage kinase 4	Kinase Set	ACGGACCATGTCTGATGGAAA	1.88	1.16485
KIAA1804	84451	mixed lineage kinase 4	Kinase Set	CGGGAACTTAACATTCTGATA	4.81	1.35477
KIAA1804	84451	mixed lineage kinase 4	Kinase Set	CTGATTGTAGTGTATCAAGAA	-3.89	0.791659
KIAA1804	84451	mixed lineage kinase 4	Kinase Set	AACACGTAGCTTCCAGCTTAA	1.24	1.00822
KIDINS220	57498	kinase D-interacting substrate, 220kDa	Kinase Set	CAGGCGAGACTCCTTATAATA	0.02	1.10477
KIDINS220	57498	kinase D-interacting substrate, 220kDa	Kinase Set	TCGCAGATGCGCTATTATCTA	-0.23	0.828928
KIDINS220	57498	kinase D-interacting substrate, 220kDa	Kinase Set	CTGCTCGACGCTGGAACATAT	-0.35	1.0574
KIDINS220	57498	kinase D-interacting substrate, 220kDa	Kinase Set	GTGCTTCGGGATTCAAATATA	0.66	0.988198
KIT	3815	v-kit Hardy-Zuckerman 4 feline sarcoma viral oncogene homolog	Kinase Set	CTCGCACCTTTCCAAAGTTAA	0.15	1.00215
KIT	3815	v-kit Hardy-Zuckerman 4 feline sarcoma viral oncogene homolog	Kinase Set	CACGGTTGAATGTAAGGCTTA	-0.41	0.976098
KIT	3815	v-kit Hardy-Zuckerman 4 feline sarcoma viral oncogene homolog	Kinase Set	CACGACGATGTCTGAGCAGAA	0.11	0.969497
KIT	3815	v-kit Hardy-Zuckerman 4 feline sarcoma viral oncogene homolog	Kinase Set	CACCGGGCCAGTATCTATATA	0	1.00774
KSR1	8844	kinase suppressor of ras 1	Kinase Set	CAAGGCGAAGCTGGTCCGTTA	-0.21	0.975964
KSR1	8844	kinase suppressor of ras 1	Kinase Set	CAAGACGTCTCTGGACATCAA	3.32	1.24309
KSR1	8844	kinase suppressor of ras 1	Kinase Set	CCGGTGGACAGAGCAGCCGAA	-0.61	1.12175
KSR1	8844	kinase suppressor of ras 1	Kinase Set	CAGCACCGTGACTTCTGCTAA	0	0.81075
KSR2	283455	kinase suppressor of ras 2	Kinase Set	CAGGCTTACCGTGGACGCCTA	-0.23	0.92756
KSR2	283455	kinase suppressor of ras 2	Kinase Set	ATCCGGTGACCTCGAATCCAA	1.37	1.03615
KSR2	283455	kinase suppressor of ras 2	Kinase Set	CTGGCTCGACTGGAGCATTAA	0	0.91314
KSR2	283455	kinase suppressor of ras 2	Kinase Set	AACCCACGAGCACTTAATATA	1.62	1.01522
LATS1	9113	LATS, large tumor suppressor, homolog 1 (Drosophila)	Kinase Set	CCCATGAATCCTCCTAATCAA	0.42	1.08121
LATS1	9113	LATS, large tumor suppressor, homolog 1 (Drosophila)	Kinase Set	CGCGATCTAGTATATGTTTAA	4.24	1.3555
LATS1	9113	LATS, large tumor suppressor, homolog 1 (Drosophila)	Kinase Set	TCCATACGAGTCAATCAGTAA	1.59	1.41633
LATS1	9113	LATS, large tumor suppressor, homolog 1 (Drosophila)	Kinase Set	TTGGTGAGTGTTCCTAGGCTA	-0.07	0.866691
LATS2	26524	LATS, large tumor suppressor, homolog 2 (Drosophila)	Kinase Set	CTGCCACGACTTATTCTGGAA	-0.53	0.960228
LATS2	26524	LATS, large tumor suppressor, homolog 2 (Drosophila)	Kinase Set	CTCCGCAAAGGGTACACTCAA	1.59	1.13311
LATS2	26524	LATS, large tumor suppressor, homolog 2 (Drosophila)	Kinase Set	AAGTTCGGACCTTATCAGAAA	0	1.33852
LATS2	26524	LATS, large tumor suppressor, homolog 2 (Drosophila)	Kinase Set	AAGGATGTCCTGAACCGGAAT	-1.35	1.04774
LCK	3932	lymphocyte-specific protein tyrosine kinase	Kinase Set	CTACGGGACATTCACCATCAA	-0.23	1.06837
LCK	3932	lymphocyte-specific protein tyrosine kinase	Kinase Set	AGGCATCAAGTTGACCATCAA	-0.05	0.946052
LCK	3932	lymphocyte-specific protein tyrosine kinase	Kinase Set	AAGGGCCAGGACTTTATCTAA	0.03	1.19894
LCK	3932	lymphocyte-specific protein tyrosine kinase	Kinase Set	CGCCATTACACCAATGCTTCA	-0.08	0.886961
LHPP	64077	phospholysine phosphohistidine inorganic pyrophosphate phosphatase	Phosphatase Set	ACCACTCACCATGGGCCTTTA	0	1.03439
LHPP	64077	phospholysine phosphohistidine inorganic pyrophosphate phosphatase	Phosphatase Set	CAGGAGGAAACTAACAGTTCA	-0.63	0.819131
LHPP	64077	phospholysine phosphohistidine inorganic pyrophosphate phosphatase	Phosphatase Set	CCCAGTCACCTTTGCAGACAA	0	1.10039
LHPP	64077	phospholysine phosphohistidine inorganic pyrophosphate phosphatase	Phosphatase Set	CCCGGTGTGTGCAGGAGGAAA	-0.82	0.811801
LIMK1	3984	LIM domain kinase 1	Kinase Set	CTGCCTGGTCCGCGAGAACAA	-1.28	0.991037
LIMK1	3984	LIM domain kinase 1	Kinase Set	AGACCGGATCTTGGAAATCAA	-1.33	0.994104
LIMK1	3984	LIM domain kinase 1	Kinase Set	CTGCTTCGGCCAGGCTATCAA	-1.79	0.894887
LIMK1	3984	LIM domain kinase 1	Kinase Set	AACCCAGACGCAGAACAATAA	1.14	1.16238
LIMK2	3985	LIM domain kinase 2	Kinase Set	CACGGGCAAAGTGATGGTCAT	0.33	1.10184
LIMK2	3985	LIM domain kinase 2	Kinase Set	CCCTGAGATGCTGAACGGAAA	-2.7	0.70931
LIMK2	3985	LIM domain kinase 2	Kinase Set	CCGGGATCTGAACTCGCACAA	1.49	1.12887
LIMK2	3985	LIM domain kinase 2	Kinase Set	TTGGTGTGCTGTACAAGGATA	-2.47	0.919746
LMTK2	22853	lemur tyrosine kinase 2	Kinase Set	CACCTCCGACTTAAATGTGAA	-0.1	0.927786
LMTK2	22853	lemur tyrosine kinase 2	Kinase Set	CAGATCAGACTAAGTATAGTA	-2.08	0.670348
LMTK2	22853	lemur tyrosine kinase 2	Kinase Set	CCGAGAGCCCTTTCAACAATA	0.82	1.04347
LMTK2	22853	lemur tyrosine kinase 2	Kinase Set	AGCGACTATTATATCCAGTTA	-2.64	0.795208
LMTK3	114783	lemur tyrosine kinase 3	Kinase Set	GCCGCCTTTCTCGGAACTGAA	-1.25	0.906565
LMTK3	114783	lemur tyrosine kinase 3	Kinase Set	CAAGTTCATCTCGGAAGCACA	0.12	1.04816
LMTK3	114783	lemur tyrosine kinase 3	Kinase Set	CTCCGTGAGCAGCGAGTACTA	0.69	1.15263
LMTK3	114783	lemur tyrosine kinase 3	Kinase Set	CCGGATGGGTAGACAACACGA	2.31	1.07365
LOC387870	387870	similar to protein tyrosine phosphatase, receptor type, Q isoform 1 precursor; glomerular mesangial cell receptor protein-tyrosine phosphatase; glomerular mesangial cell receptor protein-tyrosine phosphatase precursor	Phosphatase Set	CAGGATCGTGTTCACAAGGAT	-0.23	1.10151
LOC387870	387870	similar to protein tyrosine phosphatase, receptor type, Q isoform 1 precursor; glomerular mesangial cell receptor protein-tyrosine phosphatase; glomerular mesangial cell receptor protein-tyrosine phosphatase precursor	Phosphatase Set	TAGCAGAAAGAGGAACTTTAA	3.65	1.13762
LOC387870	387870	similar to protein tyrosine phosphatase, receptor type, Q isoform 1 precursor; glomerular mesangial cell receptor protein-tyrosine phosphatase; glomerular mesangial cell receptor protein-tyrosine phosphatase precursor	Phosphatase Set	CACGATATGTTTGTCTTGGAA	0.29	1.06023
LOC387870	387870	similar to protein tyrosine phosphatase, receptor type, Q isoform 1 precursor; glomerular mesangial cell receptor protein-tyrosine phosphatase; glomerular mesangial cell receptor protein-tyrosine phosphatase precursor	Phosphatase Set	CCAGGTGGTATTGTTAAAGTA	0	0.889211
LOC389772	389772	similar to Osteotesticular phosphatase; protein tyrosine phosphatase receptor type V; protein tyrosine phosphatase receptor type W; protein tyrosine phosphatase, receptor type, V	Phosphatase Set	AACATTATGTTGTATAGTTTA	0.83	1.25707
LOC389772	389772	similar to Osteotesticular phosphatase; protein tyrosine phosphatase receptor type V; protein tyrosine phosphatase receptor type W; protein tyrosine phosphatase, receptor type, V	Phosphatase Set	TACATTCTAGTAAGCATCTTA	1.51	1.14106
LOC389772	389772	similar to Osteotesticular phosphatase; protein tyrosine phosphatase receptor type V; protein tyrosine phosphatase receptor type W; protein tyrosine phosphatase, receptor type, V	Phosphatase Set	TAGTTTAAATATATACAATAA	0.11	1.07335
LOC389772	389772	similar to Osteotesticular phosphatase; protein tyrosine phosphatase receptor type V; protein tyrosine phosphatase receptor type W; protein tyrosine phosphatase, receptor type, V	Phosphatase Set	AAAGCAATATGTAAATCTTAA	-0.84	0.856815
LOC391025	391025	similar to protein tyrosine phosphatase, receptor type, U isoform 2 precursor; protein tyrosine phosphatase J; protein tyrosine phosphatase receptor omicron; pi R-PTP-Psi	Phosphatase Set	CAGATGAGTCTCAGCACAAAT	-0.94	1.085
LOC391025	391025	similar to protein tyrosine phosphatase, receptor type, U isoform 2 precursor; protein tyrosine phosphatase J; protein tyrosine phosphatase receptor omicron; pi R-PTP-Psi	Phosphatase Set	CTCATTAATTATGATTATTGA	-0.74	1.081
LOC391025	391025	similar to protein tyrosine phosphatase, receptor type, U isoform 2 precursor; protein tyrosine phosphatase J; protein tyrosine phosphatase receptor omicron; pi R-PTP-Psi	Phosphatase Set	CAAAGGATTCCGGAACAGAAA	-0.11	0.985188
LOC391025	391025	similar to protein tyrosine phosphatase, receptor type, U isoform 2 precursor; protein tyrosine phosphatase J; protein tyrosine phosphatase receptor omicron; pi R-PTP-Psi	Phosphatase Set	CAGGAGGGTCCTGTTGGCTCA	0	0.898902
LOC400927	400927	similar to TPTE and PTEN homologous inositol lipid phosphatase isoform alpha; TPTE and PTEN homologous inositol lipid phosphatase	Phosphatase Set	CTGGTGTCACCTATCAGTAAA	2.55	1.39066
LOC400927	400927	similar to TPTE and PTEN homologous inositol lipid phosphatase isoform alpha; TPTE and PTEN homologous inositol lipid phosphatase	Phosphatase Set	TCCAGGTGATCTGAACCTGAA	-0.91	1.02447
LOC400927	400927	similar to TPTE and PTEN homologous inositol lipid phosphatase isoform alpha; TPTE and PTEN homologous inositol lipid phosphatase	Phosphatase Set	ATGGATGTTCTTCTTCGAGTA	-1.8	0.970059
LOC400927	400927	similar to TPTE and PTEN homologous inositol lipid phosphatase isoform alpha; TPTE and PTEN homologous inositol lipid phosphatase	Phosphatase Set	TCCACAGACAAACGAATTTAA	0.28	0.899369
LOC442428	442428	similar to fructose-1,6-bisphosphatase 2; fructose-1,6-bisphosphatase isozyme 2; D-fructose-1,6-bisphosphate 1-phosphohydrolase; FBPase; muscle fructose-bisphosphatase; hexosediphosphatase	Phosphatase Set	CACCTGGATGCTACCAGGCTA	0	1.20564
LOC442428	442428	similar to fructose-1,6-bisphosphatase 2; fructose-1,6-bisphosphatase isozyme 2; D-fructose-1,6-bisphosphate 1-phosphohydrolase; FBPase; muscle fructose-bisphosphatase; hexosediphosphatase	Phosphatase Set	CAACATTGTGACCATAGTTTA	-0.38	0.885148
LOC442428	442428	similar to fructose-1,6-bisphosphatase 2; fructose-1,6-bisphosphatase isozyme 2; D-fructose-1,6-bisphosphate 1-phosphohydrolase; FBPase; muscle fructose-bisphosphatase; hexosediphosphatase	Phosphatase Set	CAAGATTAGTAAGAAAGGAAA	-0.57	1.06439
LOC442428	442428	similar to fructose-1,6-bisphosphatase 2; fructose-1,6-bisphosphatase isozyme 2; D-fructose-1,6-bisphosphate 1-phosphohydrolase; FBPase; muscle fructose-bisphosphatase; hexosediphosphatase	Phosphatase Set	CAGCCTTATGGACTCTCTCAA	46.76	2.01791
LOC474338	474338	SUMO1 pseudogene 3	Phosphatase Set	CAGAGAATTGCTGATAATCAT	0	1.21043
LOC474338	474338	SUMO1 pseudogene 3	Phosphatase Set	CAGGCTTGTGGTGATAAATAA	0.38	1.00722
LOC474338	474338	SUMO1 pseudogene 3	Phosphatase Set	AAGGAAGGTGAATATATTAAA	2.36	1.30708
LOC474338	474338	SUMO1 pseudogene 3	Phosphatase Set	CTCATTATTCATTATTGTTTA	-0.63	0.895367
LPPR2	64748	lipid phosphate phosphatase-related protein type 2	Phosphatase Set	CCGCGTGGCCGAGTACCGAAA	-1.11	0.96419
LPPR2	64748	lipid phosphate phosphatase-related protein type 2	Phosphatase Set	CCCGTGTCTAAGCATGTGCAA	0.26	0.90866
LPPR2	64748	lipid phosphate phosphatase-related protein type 2	Phosphatase Set	CCGGGACAACTTCAGCCCTTA	-0.28	1.02362
LPPR2	64748	lipid phosphate phosphatase-related protein type 2	Phosphatase Set	CTGCGTTGTGCATAACTTTCA	0.22	0.870192
LRRK1	79705	leucine-rich repeat kinase 1	Kinase Set	TTGGCCGTGCCTGTTATTAAA	2.99	1.06737
LRRK1	79705	leucine-rich repeat kinase 1	Kinase Set	ACGCACCTGGATTTAATTGAA	0.24	0.971599
LRRK1	79705	leucine-rich repeat kinase 1	Kinase Set	CAGGCCTCGCATTGTATATGA	-0.39	0.948509
LRRK1	79705	leucine-rich repeat kinase 1	Kinase Set	CTCCTATGGAATGGTGCTCTA	0.96	1.05937
LRRK2	120892	leucine-rich repeat kinase 2	Kinase Set	CTCGTCGACTTATACGTGTAA	-0.59	1.05837
LRRK2	120892	leucine-rich repeat kinase 2	Kinase Set	AGCCATGATTATATACCGAGA	0.22	0.995152
LRRK2	120892	leucine-rich repeat kinase 2	Kinase Set	CAGGTCGTGAGGAATTCTATA	1.05	1.19488
LRRK2	120892	leucine-rich repeat kinase 2	Kinase Set	CTCCTGGTCATCAATACCGAA	0.44	1.07854
LTK	4058	leukocyte receptor tyrosine kinase	Kinase Set	ACAGATCTTTGGAGTGCCTAA	-1.52	0.956057
LTK	4058	leukocyte receptor tyrosine kinase	Kinase Set	CAGGGATATTGCCGCCCGGAA	-0.43	1.05094
LTK	4058	leukocyte receptor tyrosine kinase	Kinase Set	ACCGAGAACCACGGAGAGGTA	-0.35	1.13466
LTK	4058	leukocyte receptor tyrosine kinase	Kinase Set	CACTGGATTGCTCTCCCATTA	0	1.04181
LYN	4067	v-yes-1 Yamaguchi sarcoma viral related oncogene homolog	Kinase Set	CCCGGACGACTTGTCTTTCAA	-0.16	1.0369
LYN	4067	v-yes-1 Yamaguchi sarcoma viral related oncogene homolog	Kinase Set	AAGGTGCTAAGTTCCCTATTA	1.69	1.15145
LYN	4067	v-yes-1 Yamaguchi sarcoma viral related oncogene homolog	Kinase Set	CAAGCGGTTCTGTTCACTAAA	-1.83	0.951833
LYN	4067	v-yes-1 Yamaguchi sarcoma viral related oncogene homolog	Kinase Set	CTGTATCAGCGACATGATTAA	-1.38	1.01351
MADD	8567	MAP-kinase activating death domain	Kinase Set	CACACCGTCCACTGAATTCAA	-0.26	0.943315
MADD	8567	MAP-kinase activating death domain	Kinase Set	AGGGTCGATCCAGCAATTCTA	-0.49	1.04921
MADD	8567	MAP-kinase activating death domain	Kinase Set	CAGACCCACTACTATAGTAAA	-0.24	0.971703
MADD	8567	MAP-kinase activating death domain	Kinase Set	CAGGAGGGCGTTAGTGGATCA	0	1.12569
MAGI2	9863	membrane associated guanylate kinase, WW and PDZ domain containing 2	Kinase Set	CAGGCCCAACTTGGGATATCA	-3.67	0.91861
MAGI2	9863	membrane associated guanylate kinase, WW and PDZ domain containing 2	Kinase Set	ATGGACCGATGGGAGAATCAA	-3.81	0.903467
MAGI2	9863	membrane associated guanylate kinase, WW and PDZ domain containing 2	Kinase Set	ACACGACGTTAGGAAACCAAA	-1.22	0.905936
MAGI2	9863	membrane associated guanylate kinase, WW and PDZ domain containing 2	Kinase Set	ATGAGCTCTACGAGAAATCTA	-2.36	0.761987
MAGI3	260425	membrane associated guanylate kinase, WW and PDZ domain containing 3	Kinase Set	CTGGATAGTCAGTGGTGTCAA	0	1.02203
MAGI3	260425	membrane associated guanylate kinase, WW and PDZ domain containing 3	Kinase Set	ACGAACGACATCTGTCAGCAA	6.16	1.13709
MAGI3	260425	membrane associated guanylate kinase, WW and PDZ domain containing 3	Kinase Set	CACCGTCACACTAACGGTCAT	0.77	0.909146
MAGI3	260425	membrane associated guanylate kinase, WW and PDZ domain containing 3	Kinase Set	CACGAAGAGGTAGATCGGTTA	1.16	1.08235
MAK	4117	male germ cell-associated kinase	Kinase Set	GCCCGATTCCTTCATGCTATA	0.2	1.07169
MAK	4117	male germ cell-associated kinase	Kinase Set	CAGGACGTACTTATAATCCTA	-2.06	0.779735
MAK	4117	male germ cell-associated kinase	Kinase Set	CACAGTGTTGATATATGGGTA	-0.04	1.00386
MAK	4117	male germ cell-associated kinase	Kinase Set	TGAGGTCGATGAAATCTTTAA	0.79	1.04575
MAP2K1	5604	mitogen-activated protein kinase kinase 1	Kinase Set	CTGGATCAAGTCCTGAAGAAA	-0.25	1.0407
MAP2K1	5604	mitogen-activated protein kinase kinase 1	Kinase Set	AACAACGTGTATAGTGCCTAA	0.07	0.995444
MAP2K1	5604	mitogen-activated protein kinase kinase 1	Kinase Set	AAAGTTAGCATTGCTGTAATA	-1.05	0.949109
MAP2K1	5604	mitogen-activated protein kinase kinase 1	Kinase Set	AAGTGTTTGGGAAGCAACAAA	-2.07	0.690709
MAP2K2	5605	mitogen-activated protein kinase kinase 2	Kinase Set	CCGGCCTGCCATGGCCATCTT	-1.52	1.09723
MAP2K2	5605	mitogen-activated protein kinase kinase 2	Kinase Set	GAGATCAGCATTTGCATGGAA	1.34	1.09939
MAP2K2	5605	mitogen-activated protein kinase kinase 2	Kinase Set	ACGAATGCAACTCGCCGTACA	-1.76	1.43417
MAP2K2	5605	mitogen-activated protein kinase kinase 2	Kinase Set	CATCTTTGAACTCCTGGACTA	-0.92	1.05517
MAP2K2	5605	mitogen-activated protein kinase kinase 2	Kinase Set	CCGGCCTGCCATGGCCATCTT	-1.81	0.879494
MAP2K2	5605	mitogen-activated protein kinase kinase 2	Kinase Set	GAGATCAGCATTTGCATGGAA	2.23	0.874916
MAP2K2	5605	mitogen-activated protein kinase kinase 2	Kinase Set	ACGAATGCAACTCGCCGTACA	-0.56	0.904518
MAP2K2	5605	mitogen-activated protein kinase kinase 2	Kinase Set	CATCTTTGAACTCCTGGACTA	0.92	0.969842
MAP2K3	5606	mitogen-activated protein kinase kinase 3	Kinase Set	CCGGGCCACCGTGAACTCACA	-0.22	1.06814
MAP2K3	5606	mitogen-activated protein kinase kinase 3	Kinase Set	ACGGATATCCTGCATGTCCAA	-0.25	1.09046
MAP2K3	5606	mitogen-activated protein kinase kinase 3	Kinase Set	CTGGATGCCATCCAAGTTGTA	1.97	1.35344
MAP2K3	5606	mitogen-activated protein kinase kinase 3	Kinase Set	CTCCAATGTCCTTATCAACAA	0.07	0.744869
MAP2K4	6416	mitogen-activated protein kinase kinase 4	Kinase Set	AGGGAGAATGGTGCTGTTTAA	-0.89	0.881069
MAP2K4	6416	mitogen-activated protein kinase kinase 4	Kinase Set	TTGGACGAGGAGCTTATGGTT	1.09	0.994164
MAP2K4	6416	mitogen-activated protein kinase kinase 4	Kinase Set	CTGAGAGGAAGCAAGACGTAA	1.87	1.08268
MAP2K4	6416	mitogen-activated protein kinase kinase 4	Kinase Set	CAGGCCGATTTCCTTATCCAA	1.41	1.08018
MAP2K5	5607	mitogen-activated protein kinase kinase 5	Kinase Set	CAAGACGTATGTTGGAACAAA	-0.41	0.94585
MAP2K5	5607	mitogen-activated protein kinase kinase 5	Kinase Set	AAAGGCCAGCACCTGAAGAAT	-0.36	0.823551
MAP2K5	5607	mitogen-activated protein kinase kinase 5	Kinase Set	AAGGCAATGCTGTCATATTAT	0.81	0.898976
MAP2K5	5607	mitogen-activated protein kinase kinase 5	Kinase Set	CACAGTCTACAAAGCATATCA	-2.9	0.806202
MAP2K6	5608	mitogen-activated protein kinase kinase 6	Kinase Set	AAGGCTTGCATTTCTATTGGA	-0.68	0.957309
MAP2K6	5608	mitogen-activated protein kinase kinase 6	Kinase Set	GGCCTTGGAATCTATAGTATA	-1.52	0.974234
MAP2K6	5608	mitogen-activated protein kinase kinase 6	Kinase Set	CTCATCAATGCTCTCGGTCAA	-0.33	0.921505
MAP2K6	5608	mitogen-activated protein kinase kinase 6	Kinase Set	CATGGATACATCACTAGATAA	-0.56	1.07881
MAP2K7	5609	mitogen-activated protein kinase kinase 7	Kinase Set	CAGGAAGAGACCAAAGTATAA	0.07	1.11014
MAP2K7	5609	mitogen-activated protein kinase kinase 7	Kinase Set	CCGGCGGAGGATCGACCTCAA	1.32	0.879534
MAP2K7	5609	mitogen-activated protein kinase kinase 7	Kinase Set	CCCTTAGACGCTTGAGAATAA	-0.72	0.842193
MAP2K7	5609	mitogen-activated protein kinase kinase 7	Kinase Set	CAAGATGACAGTGGCGATTGT	-0.08	1.00041
MAP3K1	4214	mitogen-activated protein kinase kinase kinase 1	Kinase Set	CTCCGGGTGTTTCAACTAGAA	-2.24	0.836908
MAP3K1	4214	mitogen-activated protein kinase kinase kinase 1	Kinase Set	CACGCATGTCAAATTCTCATA	-0.17	1.06501
MAP3K1	4214	mitogen-activated protein kinase kinase kinase 1	Kinase Set	AAACAAACCGCCGTGTTAACA	0	1.00315
MAP3K1	4214	mitogen-activated protein kinase kinase kinase 1	Kinase Set	TAGGCGTAGCTCAAGGATCAA	-1.97	0.86534
MAP3K10	4294	mitogen-activated protein kinase kinase kinase 10	Kinase Set	CTGGACCGCGGTGTTCGACTA	2	1.16444
MAP3K10	4294	mitogen-activated protein kinase kinase kinase 10	Kinase Set	CAAGCGCAAGGGCAACTTCAA	0	0.908933
MAP3K10	4294	mitogen-activated protein kinase kinase kinase 10	Kinase Set	CAGCACATGTTTGATGACCTT	-2.5	0.699059
MAP3K10	4294	mitogen-activated protein kinase kinase kinase 10	Kinase Set	GTCGTCCGTGTCCGACTGCAA	0.1	1.01779
MAP3K11	4296	mitogen-activated protein kinase kinase kinase 11	Kinase Set	CCCGACGTCTGGAGGACTCAA	1.46	1.12511
MAP3K11	4296	mitogen-activated protein kinase kinase kinase 11	Kinase Set	CCGGAGGAGAAACGTCTTCGA	-1.32	0.914839
MAP3K11	4296	mitogen-activated protein kinase kinase kinase 11	Kinase Set	CAGCATGCCACTCGACTTCAA	-0.22	1.17261
MAP3K11	4296	mitogen-activated protein kinase kinase kinase 11	Kinase Set	CACATGGTACCTGGATTCAGA	-1.63	0.814418
MAP3K12	7786	mitogen-activated protein kinase kinase kinase 12	Kinase Set	CTCAGGCGAGAGCAAGCTTTA	-0.77	0.945437
MAP3K12	7786	mitogen-activated protein kinase kinase kinase 12	Kinase Set	CTGGAATAGCAAACCACGAAA	-0.87	0.967064
MAP3K12	7786	mitogen-activated protein kinase kinase kinase 12	Kinase Set	CAGGGAGCACTATGAAAGGAA	-0.19	1.01189
MAP3K12	7786	mitogen-activated protein kinase kinase kinase 12	Kinase Set	CAGGGATCTCAAGTCACCCAA	-0.79	0.817724
MAP3K13	9175	mitogen-activated protein kinase kinase kinase 13	Kinase Set	CAGACTCAATATGCACGGACA	-0.02	1.12394
MAP3K13	9175	mitogen-activated protein kinase kinase kinase 13	Kinase Set	GAGGAAGTTGAAGCACCCTAA	0.36	0.836555
MAP3K13	9175	mitogen-activated protein kinase kinase kinase 13	Kinase Set	AAGGACTATTTGGATGCTTAA	2.51	1.15796
MAP3K13	9175	mitogen-activated protein kinase kinase kinase 13	Kinase Set	CTGGATATTCGTGAACACTAT	-2.98	0.840357
MAP3K14	9020	mitogen-activated protein kinase kinase kinase 14	Kinase Set	TACCTAGTGCATGCTCTGCAA	0.63	1.11523
MAP3K14	9020	mitogen-activated protein kinase kinase kinase 14	Kinase Set	CAGGACTCACGTAGCATTAAA	-0.48	0.661239
MAP3K14	9020	mitogen-activated protein kinase kinase kinase 14	Kinase Set	CACATGCATGTGACTCCTCAA	0.1	1.03614
MAP3K14	9020	mitogen-activated protein kinase kinase kinase 14	Kinase Set	AACCAAGACATCCACCGCCAA	-0.69	0.909586
MAP3K15	389840	mitogen-activated protein kinase kinase kinase 15	Kinase Set	GAGAACGGCTACATTAAGATA	-0.02	1.1377
MAP3K15	389840	mitogen-activated protein kinase kinase kinase 15	Kinase Set	CTGGATGTTCGCGATGGACAA	-0.68	0.977927
MAP3K15	389840	mitogen-activated protein kinase kinase kinase 15	Kinase Set	GGCCGAGATCTGAGCAATCAA	0	1.10193
MAP3K15	389840	mitogen-activated protein kinase kinase kinase 15	Kinase Set	AGGGTTATACACTTTCGGATA	0.65	1.18077
MAP3K2	10746	mitogen-activated protein kinase kinase kinase 2	Kinase Set	CAGAATGATGTCCGAGTCAAA	-0.24	1.07722
MAP3K2	10746	mitogen-activated protein kinase kinase kinase 2	Kinase Set	ATGGGTCATTCACTAGTATCA	0.03	1.11958
MAP3K2	10746	mitogen-activated protein kinase kinase kinase 2	Kinase Set	CAGAGTATGATGATAGTCGAA	0.19	1.13868
MAP3K2	10746	mitogen-activated protein kinase kinase kinase 2	Kinase Set	TAGGAGCGAAGAGTTCAATTA	1.09	0.891008
MAP3K3	4215	mitogen-activated protein kinase kinase kinase 3	Kinase Set	CAGGAATACTCAGATCGGGAA	-1.72	0.843801
MAP3K3	4215	mitogen-activated protein kinase kinase kinase 3	Kinase Set	CCACGTGTCTGTGCACCACAA	0	0.842118
MAP3K3	4215	mitogen-activated protein kinase kinase kinase 3	Kinase Set	CAGGGTCTATTTGTGCTATGA	-1.59	0.685628
MAP3K3	4215	mitogen-activated protein kinase kinase kinase 3	Kinase Set	CAGCCGGCCTGTGAAATATGA	-3.52	0.808149
MAP3K4	4216	mitogen-activated protein kinase kinase kinase 4	Kinase Set	CACCAATCCCTGAAAGATTAA	0	0.967907
MAP3K4	4216	mitogen-activated protein kinase kinase kinase 4	Kinase Set	CTCAAGCATCGCATAGTTTAA	0	0.947972
MAP3K4	4216	mitogen-activated protein kinase kinase kinase 4	Kinase Set	AAGAGATTCGATTTCAACCTA	0.66	0.995903
MAP3K4	4216	mitogen-activated protein kinase kinase kinase 4	Kinase Set	AGGCACTCTGTTTGTGGTTAA	-0.25	0.992453
MAP3K5	4217	mitogen-activated protein kinase kinase kinase 5	Kinase Set	CAGCGAGTAGATAATATCGAA	-1.89	1.06064
MAP3K5	4217	mitogen-activated protein kinase kinase kinase 5	Kinase Set	CCGGGAATCTATACTCAATGA	0.93	1.09632
MAP3K5	4217	mitogen-activated protein kinase kinase kinase 5	Kinase Set	AACGAAGCGAGCCAAGGGCAA	0.17	1.13187
MAP3K5	4217	mitogen-activated protein kinase kinase kinase 5	Kinase Set	CTCGTAATTTATACACTGGTA	-0.81	1.01322
MAP3K6	9064	mitogen-activated protein kinase kinase kinase 6	Kinase Set	CACCATCCAAATGCTGTTGAA	1.63	1.15334
MAP3K6	9064	mitogen-activated protein kinase kinase kinase 6	Kinase Set	CCACAAGAACATAGTGCGCTA	0.64	0.961271
MAP3K6	9064	mitogen-activated protein kinase kinase kinase 6	Kinase Set	CACAGGAACTCTGCAGTATAT	0.15	0.835255
MAP3K6	9064	mitogen-activated protein kinase kinase kinase 6	Kinase Set	CACCCAAGCACTACCAGACAA	0.33	0.979803
MAP3K7	6885	mitogen-activated protein kinase kinase kinase 7	Kinase Set	CCCGTGTGAACCATCCTAATA	0	0.984741
MAP3K7	6885	mitogen-activated protein kinase kinase kinase 7	Kinase Set	AAGATGGTATATACCAAGTTA	0.02	1.00233
MAP3K7	6885	mitogen-activated protein kinase kinase kinase 7	Kinase Set	AAGACTTGACTGTAACTGGAA	0	1.03252
MAP3K7	6885	mitogen-activated protein kinase kinase kinase 7	Kinase Set	AACGGACAGCCAAGACGTAGA	-1.06	0.865279
MAP3K7IP1	10454	mitogen-activated protein kinase kinase kinase 7 interacting protein 1	Kinase Set	AACGGCTATGATGGCAACCGA	1.68	1.27187
MAP3K7IP1	10454	mitogen-activated protein kinase kinase kinase 7 interacting protein 1	Kinase Set	ACGCCTTGGCTGAGAAGGCAA	1.72	1.12697
MAP3K7IP1	10454	mitogen-activated protein kinase kinase kinase 7 interacting protein 1	Kinase Set	CAGGAGATTGCTGCGATGATT	1.1	1.25463
MAP3K7IP1	10454	mitogen-activated protein kinase kinase kinase 7 interacting protein 1	Kinase Set	CTGGCTCAAGTTCAGGAGTGA	-0.41	0.938452
MAP3K7IP2	23118	mitogen-activated protein kinase kinase kinase 7 interacting protein 2	Kinase Set	TGGCTGGGTATCTCAGTTTAA	0.2	0.82453
MAP3K7IP2	23118	mitogen-activated protein kinase kinase kinase 7 interacting protein 2	Kinase Set	CAGTCAATAGCCAGACCTTAA	-0.79	0.8154
MAP3K7IP2	23118	mitogen-activated protein kinase kinase kinase 7 interacting protein 2	Kinase Set	TAAGGTCTATATTTCAGCGAA	0.27	1.13336
MAP3K7IP2	23118	mitogen-activated protein kinase kinase kinase 7 interacting protein 2	Kinase Set	CAGATTGACATTGACTGCTTA	1.22	1.07658
MAP3K8	1326	mitogen-activated protein kinase kinase kinase 8	Kinase Set	AAGGATAATAGAGTAGCCTAA	0.16	1.15392
MAP3K8	1326	mitogen-activated protein kinase kinase kinase 8	Kinase Set	AAGAGCAACAGTAATGGAGTA	0.13	1.12654
MAP3K8	1326	mitogen-activated protein kinase kinase kinase 8	Kinase Set	AAGAAAGTGATCCATCATGAT	0.42	1.29567
MAP3K8	1326	mitogen-activated protein kinase kinase kinase 8	Kinase Set	CGGGCAGTCTCTTTCTGTTTA	0.06	1.13513
MAP3K9	4293	mitogen-activated protein kinase kinase kinase 9	Kinase Set	ACCATAGAGAATGTTCGCCAA	0.87	1.02795
MAP3K9	4293	mitogen-activated protein kinase kinase kinase 9	Kinase Set	CAGGAGCTCAGTCGTCCCAAA	-3.37	0.98839
MAP3K9	4293	mitogen-activated protein kinase kinase kinase 9	Kinase Set	CACGACCATCTTTCACGAATA	1.45	1.50856
MAP3K9	4293	mitogen-activated protein kinase kinase kinase 9	Kinase Set	CTGGACGGCCGTGTTCGAGTA	-0.18	0.989716
MAP4K1	11184	mitogen-activated protein kinase kinase kinase kinase 1	Kinase Set	TACGTGGGTGTACTCCATCAA	-0.52	0.987964
MAP4K1	11184	mitogen-activated protein kinase kinase kinase kinase 1	Kinase Set	CTGACTAAGAGTCCCAAGAAA	-0.81	0.743569
MAP4K1	11184	mitogen-activated protein kinase kinase kinase kinase 1	Kinase Set	CGGGACCACTATGACCTGCTA	0.18	1.00473
MAP4K1	11184	mitogen-activated protein kinase kinase kinase kinase 1	Kinase Set	ACCAAGATGCTCAGTCATCAA	0.37	1.00175
MAP4K2	5871	mitogen-activated protein kinase kinase kinase kinase 2	Kinase Set	CTGGCTCTACTGCGTGAACAA	3.88	0.885954
MAP4K2	5871	mitogen-activated protein kinase kinase kinase kinase 2	Kinase Set	TCGGTCAGCCTCAGAATTCCA	-2.03	0.743855
MAP4K2	5871	mitogen-activated protein kinase kinase kinase kinase 2	Kinase Set	GCCGCCCAAACTGAGAGATAA	-0.87	1.06586
MAP4K2	5871	mitogen-activated protein kinase kinase kinase kinase 2	Kinase Set	AAAGGTGGCTACAATGAGCTA	0	0.979854
MAP4K3	8491	mitogen-activated protein kinase kinase kinase kinase 3	Kinase Set	GAGGTGGTTCTTTACAGGATA	-0.16	1.05459
MAP4K3	8491	mitogen-activated protein kinase kinase kinase kinase 3	Kinase Set	TAACATTCTATTAACGGATAA	1.32	1.05161
MAP4K3	8491	mitogen-activated protein kinase kinase kinase kinase 3	Kinase Set	TACTTGATATTTGGTGCCGAA	-0.08	1.03267
MAP4K3	8491	mitogen-activated protein kinase kinase kinase kinase 3	Kinase Set	CAGACTAGCATTGTTCTATTA	0.28	1.0061
MAP4K4	9448	mitogen-activated protein kinase kinase kinase kinase 4	Kinase Set	AGGCAAGATCCTACCCGGAAA	0.37	1.03871
MAP4K4	9448	mitogen-activated protein kinase kinase kinase kinase 4	Kinase Set	TCGGAGCTGCACCGAGGGCAA	3.3	1.24995
MAP4K4	9448	mitogen-activated protein kinase kinase kinase kinase 4	Kinase Set	TCCGCCAGACTCAGTCCGCTA	-0.19	1.1802
MAP4K4	9448	mitogen-activated protein kinase kinase kinase kinase 4	Kinase Set	CCCAGTGAAGTTTCTCCGTTA	-0.23	0.87098
MAP4K5	11183	mitogen-activated protein kinase kinase kinase kinase 5	Kinase Set	TCCGCTTATTAGGATCAGACA	4.13	1.21684
MAP4K5	11183	mitogen-activated protein kinase kinase kinase kinase 5	Kinase Set	CTGATGGGATAGTATCAATAA	1.24	1.153
MAP4K5	11183	mitogen-activated protein kinase kinase kinase kinase 5	Kinase Set	GGGAGTTATCTTAGTCGGGAA	0.67	1.2437
MAP4K5	11183	mitogen-activated protein kinase kinase kinase kinase 5	Kinase Set	AAGAATGGTGGCTACAACCAA	2.5	1.0026
MAPK1	5594	mitogen-activated protein kinase 1	Kinase Set	AATGACATTATTCGAGCACCA	-3.26	0.926791
MAPK1	5594	mitogen-activated protein kinase 1	Kinase Set	AAGTTCGAGTAGCTATCAAGA	0.25	0.943384
MAPK1	5594	mitogen-activated protein kinase 1	Kinase Set	CGGCATGGTGTGCTCTGCTTA	-0.28	0.948599
MAPK1	5594	mitogen-activated protein kinase 1	Kinase Set	CAAGTTCGACATGGAATTGGA	-0.69	0.915427
MAPK10	5602	mitogen-activated protein kinase 10	Kinase Set	TCCGAGCACAATAAACTCAAA	4.08	1.07315
MAPK10	5602	mitogen-activated protein kinase 10	Kinase Set	TCCATATGTGGTGACACGTTA	1.92	1.104
MAPK10	5602	mitogen-activated protein kinase 10	Kinase Set	ACCAAGTAACATTGTAGTCAA	1.05	1.17107
MAPK10	5602	mitogen-activated protein kinase 10	Kinase Set	AGGGTTCTGTATTGCAGCTAA	-0.08	1.06854
MAPK11	5600	mitogen-activated protein kinase 11	Kinase Set	CTGAGCGACGAGCACGTTCAA	0	0.937916
MAPK11	5600	mitogen-activated protein kinase 11	Kinase Set	CAGGATGGAGCTGATCCAGTA	-1.61	0.919636
MAPK11	5600	mitogen-activated protein kinase 11	Kinase Set	CAGAACACGCCCGGACATATA	1.01	1.09443
MAPK11	5600	mitogen-activated protein kinase 11	Kinase Set	CACGCATGTATGCATGCACAA	0.11	1.06257
MAPK12	6300	mitogen-activated protein kinase 12	Kinase Set	CTGGACGTATTCACTCCTGAT	0.94	1.07279
MAPK12	6300	mitogen-activated protein kinase 12	Kinase Set	TGGAAGCGTGTTACTTACAAA	0.24	0.952956
MAPK12	6300	mitogen-activated protein kinase 12	Kinase Set	CACAGGCAAGACGCTGTTCAA	2.29	1.05329
MAPK12	6300	mitogen-activated protein kinase 12	Kinase Set	CGGCGCTAAGGTGGCCATCAA	2.28	1.02663
MAPK13	5603	mitogen-activated protein kinase 13	Kinase Set	CGGGATGAGCCTCATCCGGAA	-2.72	0.68604
MAPK13	5603	mitogen-activated protein kinase 13	Kinase Set	CCGGAGTGGCATGAAGCTGTA	-0.02	0.961504
MAPK13	5603	mitogen-activated protein kinase 13	Kinase Set	TAGGGATGCTCTAACGAATTA	1.16	1.2485
MAPK13	5603	mitogen-activated protein kinase 13	Kinase Set	CAGAAGGGTCCTTCTCCTTAT	0.06	1.06193
MAPK14	1432	mitogen-activated protein kinase 14	Kinase Set	AACTGCGGTTACTTAAACATA	-1.19	0.888251
MAPK14	1432	mitogen-activated protein kinase 14	Kinase Set	CTCAGTGATACGTACAGCCAA	-0.33	1.0161
MAPK14	1432	mitogen-activated protein kinase 14	Kinase Set	CTCCGAGGTCTAAAGTATATA	0	1.28846
MAPK14	1432	mitogen-activated protein kinase 14	Kinase Set	CAGTCCATCATTCATGCGAAA	-0.05	0.984917
MAPK15	225689	mitogen-activated protein kinase 15	Kinase Set	CCACTGACTTCCTCCAATAAA	0.72	1.15898
MAPK15	225689	mitogen-activated protein kinase 15	Kinase Set	TTGCTTGGAGGCTACTCCCAA	0	0.865833
MAPK15	225689	mitogen-activated protein kinase 15	Kinase Set	CAGCGGCACCTCGAGAGAGAA	-0.3	0.982498
MAPK15	225689	mitogen-activated protein kinase 15	Kinase Set	GAGGTCGTGGCCATCAAGAAA	0.94	1.00177
MAPK3	5595	mitogen-activated protein kinase 3	Kinase Set	CTCCCTGACCCGTCTAATATA	-1.44	0.945647
MAPK3	5595	mitogen-activated protein kinase 3	Kinase Set	AACGTGCTCCACCGAGATCTA	0.58	0.991282
MAPK3	5595	mitogen-activated protein kinase 3	Kinase Set	CAAGACTCGCGTGGCCATCAA	-1.47	0.843013
MAPK3	5595	mitogen-activated protein kinase 3	Kinase Set	TGGACCGGATGTTAACCTTTA	2.84	1.21596
MAPK4	5596	mitogen-activated protein kinase 4	Kinase Set	AAGGATCGTTGATCAGCATTA	-2.14	0.949759
MAPK4	5596	mitogen-activated protein kinase 4	Kinase Set	CACAGAGGACCTCGTGCTCAA	-1.67	0.913174
MAPK4	5596	mitogen-activated protein kinase 4	Kinase Set	GAGGACCTGCCGGACAATAAA	-0.41	1.12921
MAPK4	5596	mitogen-activated protein kinase 4	Kinase Set	CTGCCGGAAGGTCGCTGTGAA	-1.5	0.978434
MAPK6	5597	mitogen-activated protein kinase 6	Kinase Set	ATGGATCGGTTAACAGCAGAA	-4.61	0.687476
MAPK6	5597	mitogen-activated protein kinase 6	Kinase Set	TCCAGTTGGGTCACCACTTAA	-0.26	0.890368
MAPK6	5597	mitogen-activated protein kinase 6	Kinase Set	CAGGAGCTTCTCAGCGTAATT	-0.07	0.965671
MAPK6	5597	mitogen-activated protein kinase 6	Kinase Set	CTGTCCGATGTCACTGATGAA	-1.49	0.934857
MAPK7	5598	mitogen-activated protein kinase 7	Kinase Set	CAGACCCACCTTTCAGCCTTA	2.32	1.13888
MAPK7	5598	mitogen-activated protein kinase 7	Kinase Set	TTGGATTATTCTGCAGGTTCA	1.06	0.97152
MAPK7	5598	mitogen-activated protein kinase 7	Kinase Set	CCGCTGAACATCAGTACTTCA	-0.09	0.942936
MAPK7	5598	mitogen-activated protein kinase 7	Kinase Set	AAGAAAGATGGTGCCATCTCA	1.89	1.15036
MAPK8	5599	mitogen-activated protein kinase 8	Kinase Set	GCCCAGTAATATAGTAGTAAA	2.2	1.11319
MAPK8	5599	mitogen-activated protein kinase 8	Kinase Set	AAGAAGCTAAGCCGACCATTT	0	0.919147
MAPK8	5599	mitogen-activated protein kinase 8	Kinase Set	CCCGTACATCAATGTCTGGTA	-1.36	1.04585
MAPK8	5599	mitogen-activated protein kinase 8	Kinase Set	CAGATGGAGCTAGATCATGAA	0.8	1.0307
MAPK8IP1	9479	mitogen-activated protein kinase 8 interacting protein 1	Kinase Set	TGGCATCAGCTTACAGTGCAA	0.03	1.07558
MAPK8IP1	9479	mitogen-activated protein kinase 8 interacting protein 1	Kinase Set	CTGGAGGAGTTTGAGGATGAA	-2.14	0.772803
MAPK8IP1	9479	mitogen-activated protein kinase 8 interacting protein 1	Kinase Set	CCCGTGTCCTGCCTTGATGAA	0.11	1.04075
MAPK8IP1	9479	mitogen-activated protein kinase 8 interacting protein 1	Kinase Set	CAGGATCGGGTGTCTCGATCA	2.37	1.22889
MAPK8IP2	23542	mitogen-activated protein kinase 8 interacting protein 2	Kinase Set	CCAGGACTCCCTAAACAACAA	-0.05	0.959372
MAPK8IP2	23542	mitogen-activated protein kinase 8 interacting protein 2	Kinase Set	AAGATTGCCACTGCCCGGAAA	0	0.808761
MAPK8IP2	23542	mitogen-activated protein kinase 8 interacting protein 2	Kinase Set	GAGATGATCGATGACAATGAA	0.3	1.05022
MAPK8IP2	23542	mitogen-activated protein kinase 8 interacting protein 2	Kinase Set	ACAGGTAATGTCGGCTTCCAA	2.8	1.0407
MAPK8IP3	23162	mitogen-activated protein kinase 8 interacting protein 3	Kinase Set	CAGCCGCAACATGGAAGTACA	-2.11	0.827077
MAPK8IP3	23162	mitogen-activated protein kinase 8 interacting protein 3	Kinase Set	GACGAGTGGTCTGATGTTCAA	-1.02	0.867907
MAPK8IP3	23162	mitogen-activated protein kinase 8 interacting protein 3	Kinase Set	CTCGGTGAACATCCACTACAA	1.97	1.22539
MAPK8IP3	23162	mitogen-activated protein kinase 8 interacting protein 3	Kinase Set	CCGCGTGTGGTGTGGCTACAA	-1.63	0.868836
MAPK9	5601	mitogen-activated protein kinase 9	Kinase Set	ATCGTGAACTTGTCCTCTTAA	-0.21	0.928224
MAPK9	5601	mitogen-activated protein kinase 9	Kinase Set	AAGAGAGCTTATCGTGAACTT	-1.76	0.809469
MAPK9	5601	mitogen-activated protein kinase 9	Kinase Set	TAGGATTGCCTGCTTAGATGA	-0.25	1.0847
MAPK9	5601	mitogen-activated protein kinase 9	Kinase Set	AAGCGGATCTCTGTAGACGAA	-1.01	1.02203
MAPKAP1	79109	mitogen-activated protein kinase associated protein 1	Kinase Set	AAGGGTCATGTAGGTACAACA	-0.08	0.967619
MAPKAP1	79109	mitogen-activated protein kinase associated protein 1	Kinase Set	TCGATATTATCTGTACGCCTA	1.85	1.20518
MAPKAP1	79109	mitogen-activated protein kinase associated protein 1	Kinase Set	CTCCCTTATTCAGGTGGACAA	1.31	1.24781
MAPKAP1	79109	mitogen-activated protein kinase associated protein 1	Kinase Set	AACCAAGAAGATCGATGTCTA	0	0.926899
MAPKAPK2	9261	mitogen-activated protein kinase-activated protein kinase 2	Kinase Set	CAGGAGAAATTCGCCCTCAAA	-1.32	0.937627
MAPKAPK2	9261	mitogen-activated protein kinase-activated protein kinase 2	Kinase Set	CCCGGGCACCATGCTGTCCAA	0.71	0.975467
MAPKAPK2	9261	mitogen-activated protein kinase-activated protein kinase 2	Kinase Set	ACCCTTGGATCATGCAATCAA	-0.93	0.860137
MAPKAPK2	9261	mitogen-activated protein kinase-activated protein kinase 2	Kinase Set	CCAGCACTCGATTGTTGTAAA	0.31	1.05196
MAPKAPK3	7867	mitogen-activated protein kinase-activated protein kinase 3	Kinase Set	CCAGATAGTAATAAACACCAT	-2.04	0.968825
MAPKAPK3	7867	mitogen-activated protein kinase-activated protein kinase 3	Kinase Set	AGCCTGCATAACAGACTGAAA	3.87	1.12418
MAPKAPK3	7867	mitogen-activated protein kinase-activated protein kinase 3	Kinase Set	ACCCTGCTATACTCCCTATTA	0.41	1.13267
MAPKAPK3	7867	mitogen-activated protein kinase-activated protein kinase 3	Kinase Set	CCGGCAGGAGGTAGACCATCA	-1.15	0.910953
MAPKAPK5	8550	mitogen-activated protein kinase-activated protein kinase 5	Kinase Set	CAGATAAAGTAGATCGACTAA	-0.68	0.891283
MAPKAPK5	8550	mitogen-activated protein kinase-activated protein kinase 5	Kinase Set	GACGCCCTACACTTACAACAA	52.24	2.5721
MAPKAPK5	8550	mitogen-activated protein kinase-activated protein kinase 5	Kinase Set	AGGGCCCGACTCTTAATTGTA	-0.26	0.963616
MAPKAPK5	8550	mitogen-activated protein kinase-activated protein kinase 5	Kinase Set	CTGCGGCACTGTCACTTGTTA	-1.23	0.998344
MAPKBP1	23005	mitogen-activated protein kinase binding protein 1	Kinase Set	CAGGACCGAAATATTCGGATA	2.3	1.29189
MAPKBP1	23005	mitogen-activated protein kinase binding protein 1	Kinase Set	CCGATCAGGTTTAGTTGCTTA	0.73	1.02845
MAPKBP1	23005	mitogen-activated protein kinase binding protein 1	Kinase Set	CCCAAAGGGTTTCTCGTCATA	1.23	1.23498
MAPKBP1	23005	mitogen-activated protein kinase binding protein 1	Kinase Set	CCAGCATGACATGATCGTCAA	1.43	1.17702
MAPKSP1	8649	MAPK scaffold protein 1	Kinase Set	ATGCCCAGGCTTGCAGAATAA	0	0.965588
MAPKSP1	8649	MAPK scaffold protein 1	Kinase Set	TTGCATTGAGTGAGGAACATA	0.35	1.07174
MAPKSP1	8649	MAPK scaffold protein 1	Kinase Set	ACAGGACTAATTGTCAGCCTA	-1.16	0.88154
MAPKSP1	8649	MAPK scaffold protein 1	Kinase Set	CTACCAGGTGGTTCAATTTAA	-2.24	0.902516
MARCKS	4082	myristoylated alanine-rich protein kinase C substrate	Kinase Set	TTGAGTTTCTTTGTTGAAGAA	0	1.13683
MARCKS	4082	myristoylated alanine-rich protein kinase C substrate	Kinase Set	TAGGAGTTCATTTAAACCATA	0.85	0.996815
MARCKS	4082	myristoylated alanine-rich protein kinase C substrate	Kinase Set	CAGCCCGAGTGCAGTCCAGAA	0	1.20285
MARCKS	4082	myristoylated alanine-rich protein kinase C substrate	Kinase Set	TCCAGTCGTCTTTGAGAATAA	-0.13	1.01988
MARK1	4139	MAP/microtubule affinity-regulating kinase 1	Kinase Set	TCGATACGTAGCATTGCAGAA	0.35	0.947887
MARK1	4139	MAP/microtubule affinity-regulating kinase 1	Kinase Set	TCCCTCGTTACTGTCCGCATA	0.08	0.963582
MARK1	4139	MAP/microtubule affinity-regulating kinase 1	Kinase Set	CCGGCCCAGTAGTGACTTAAA	3.16	1.28483
MARK1	4139	MAP/microtubule affinity-regulating kinase 1	Kinase Set	AAGCTGTGATAAATACTGTAA	2.65	1.20369
MARK2	2011	MAP/microtubule affinity-regulating kinase 2	Kinase Set	CCACCTCTAATTCTTACTCTA	-0.07	0.995343
MARK2	2011	MAP/microtubule affinity-regulating kinase 2	Kinase Set	AGCCAACGAGCTGAAGCTTTA	-1.39	0.736339
MARK2	2011	MAP/microtubule affinity-regulating kinase 2	Kinase Set	CACGAGCTCCATGGAGCCCAA	1.49	1.12571
MARK2	2011	MAP/microtubule affinity-regulating kinase 2	Kinase Set	CAGAAACTATTCCGCGAAGTA	-0.44	0.920912
MARK3	4140	MAP/microtubule affinity-regulating kinase 3	Kinase Set	AACGGCGAACCGCAACATATA	-0.78	0.975738
MARK3	4140	MAP/microtubule affinity-regulating kinase 3	Kinase Set	CACGACGAAATACTTATGTTT	0.09	1.05491
MARK3	4140	MAP/microtubule affinity-regulating kinase 3	Kinase Set	ATGGGATATTCACAAGAAGAA	-0.44	1.0439
MARK3	4140	MAP/microtubule affinity-regulating kinase 3	Kinase Set	GAGCTCGGTGTAGAAACTCTA	0.69	0.958245
MARK4	57787	MAP/microtubule affinity-regulating kinase 4	Kinase Set	CTGCAGCCTGTTGCCCAATAA	1.92	1.16377
MARK4	57787	MAP/microtubule affinity-regulating kinase 4	Kinase Set	CCGCATCATGAAGGGCCTAAA	1.82	0.964547
MARK4	57787	MAP/microtubule affinity-regulating kinase 4	Kinase Set	TAGGAGTTAGTTAGGCATTGA	0	0.937781
MARK4	57787	MAP/microtubule affinity-regulating kinase 4	Kinase Set	CCATGTTACACTGGACTCTAA	0.84	1.04757
MAST1	22983	microtubule associated serine/threonine kinase 1	Kinase Set	CAACGAGATCGTGATGATGAA	-0.75	1.01903
MAST1	22983	microtubule associated serine/threonine kinase 1	Kinase Set	CCGCGCTTTCTAATTTCTCGA	-0.98	0.891781
MAST1	22983	microtubule associated serine/threonine kinase 1	Kinase Set	CAGTATGTTCCGCCGCACCAA	-0.09	0.898013
MAST1	22983	microtubule associated serine/threonine kinase 1	Kinase Set	CCCGAGGTCATCCTGCGTCAA	-2.1	0.881789
MAST2	23139	microtubule associated serine/threonine kinase 2	Kinase Set	CAGGAGTGTGCTGTCTGGCAA	1.28	1.09743
MAST2	23139	microtubule associated serine/threonine kinase 2	Kinase Set	CAGATGGAGCCCTGAGCTTTA	1.05	1.13885
MAST2	23139	microtubule associated serine/threonine kinase 2	Kinase Set	CGCGGCAAGGATGGGCAAGAA	-2.51	0.831482
MAST2	23139	microtubule associated serine/threonine kinase 2	Kinase Set	ATGGTGATGGAGTACGTTGAA	0.04	1.14387
MAST3	23031	microtubule associated serine/threonine kinase 3	Kinase Set	CACGGAGGAAGCCATGCGAAA	-0.08	1.09634
MAST3	23031	microtubule associated serine/threonine kinase 3	Kinase Set	CTGGAGTACCTGCATAACTAT	-1.05	1.07703
MAST3	23031	microtubule associated serine/threonine kinase 3	Kinase Set	CCCGCGCTCTCTGTCCTCGAA	0.08	1.33313
MAST3	23031	microtubule associated serine/threonine kinase 3	Kinase Set	CTGCGGGATTACGTCCAGCTA	-1.62	0.773193
MAST4	375449	microtubule associated serine/threonine kinase family member 4	Kinase Set	GAGGAGCTTGACCACATATTA	0	0.974841
MAST4	375449	microtubule associated serine/threonine kinase family member 4	Kinase Set	GAGGAGCTTGACCACATATTA	2.07	1.0225
MAST4	375449	microtubule associated serine/threonine kinase family member 4	Kinase Set	ATGAATTGCCACCACATTAAA	-1.47	0.972391
MAST4	375449	microtubule associated serine/threonine kinase family member 4	Kinase Set	ATGAATTGCCACCACATTAAA	-0.51	0.822658
MAST4	375449	microtubule associated serine/threonine kinase family member 4	Kinase Set	CCCAGAAGAGGAAGTTTGATA	0.21	1.09949
MAST4	375449	microtubule associated serine/threonine kinase family member 4	Kinase Set	CCCAGAAGAGGAAGTTTGATA	-0.2	0.980183
MAST4	375449	microtubule associated serine/threonine kinase family member 4	Kinase Set	TTCCCAGTTGTAACCGGTAAA	-3.82	0.984367
MAST4	375449	microtubule associated serine/threonine kinase family member 4	Kinase Set	TTCCCAGTTGTAACCGGTAAA	-0.35	1.02424
MASTL	84930	microtubule associated serine/threonine kinase-like	Kinase Set	CAGGACAAGTGTTATCGCTTA	0.45	1.08219
MASTL	84930	microtubule associated serine/threonine kinase-like	Kinase Set	CAGCCCTTAGATTCAGATAGA	1.51	0.835416
MASTL	84930	microtubule associated serine/threonine kinase-like	Kinase Set	ATGGATATCCTTACAACACCA	0.29	1.1184
MASTL	84930	microtubule associated serine/threonine kinase-like	Kinase Set	CCCGTTGATGATGGGCGAATT	2.89	1.15108
MATK	4145	megakaryocyte-associated tyrosine kinase	Kinase Set	GACGGATTCTAAGGACTCTAA	-0.15	1.12448
MATK	4145	megakaryocyte-associated tyrosine kinase	Kinase Set	ATGGACGGGCTCCGTACCCTA	-0.52	1.09422
MATK	4145	megakaryocyte-associated tyrosine kinase	Kinase Set	CAGGGCGGGCTGGTTACTGAA	1.76	1.32954
MATK	4145	megakaryocyte-associated tyrosine kinase	Kinase Set	CACCAAGCTGGTGAGACCAAA	0.66	1.0882
MELK	9833	maternal embryonic leucine zipper kinase	Kinase Set	CGGGTTGTCTTCCGTCAGATA	3.11	1.25507
MELK	9833	maternal embryonic leucine zipper kinase	Kinase Set	CAAGTACTGGACAGAATCAAA	1.54	1.27278
MELK	9833	maternal embryonic leucine zipper kinase	Kinase Set	AAGACTAAAGCTTCACTATAA	0.02	1.16972
MELK	9833	maternal embryonic leucine zipper kinase	Kinase Set	CACCTCGATGATGATTGCGTA	-0.06	1.12766
MERTK	10461	c-mer proto-oncogene tyrosine kinase	Kinase Set	CACCAGAAACACAGCCTTCAA	-3.73	0.912103
MERTK	10461	c-mer proto-oncogene tyrosine kinase	Kinase Set	TCCACTGGACTTGAACATCGA	-2.24	0.616583
MERTK	10461	c-mer proto-oncogene tyrosine kinase	Kinase Set	CAGACGTTATTTACGTCAATA	-2.46	0.855076
MERTK	10461	c-mer proto-oncogene tyrosine kinase	Kinase Set	CCCATCTACATCGAAGTACAA	-1.94	0.820687
MET	4233	met proto-oncogene (hepatocyte growth factor receptor)	Kinase Set	CGCGCCGTGATGAATATCGAA	0	1.07328
MET	4233	met proto-oncogene (hepatocyte growth factor receptor)	Kinase Set	AACACCCATCCAGAATGTCAT	0	1.04338
MET	4233	met proto-oncogene (hepatocyte growth factor receptor)	Kinase Set	AAGCCAATTTATCAGGAGGTG	0	1.16243
MET	4233	met proto-oncogene (hepatocyte growth factor receptor)	Kinase Set	AAGTATCAGCTTCCCAACTTC	-0.83	0.775717
MINK1	50488	misshapen-like kinase 1 (zebrafish)	Kinase Set	CCGGAAGTACAAGAAGCGATT	-1.14	1.02521
MINK1	50488	misshapen-like kinase 1 (zebrafish)	Kinase Set	CACGTACGGGCGCATCATTAA	-2.92	0.809458
MINK1	50488	misshapen-like kinase 1 (zebrafish)	Kinase Set	CACATGTCTCATCAAGACTTA	-0.68	1.06549
MINK1	50488	misshapen-like kinase 1 (zebrafish)	Kinase Set	CCGGAACAAGATTCTGCACAA	0.74	1.16155
MINPP1	9562	multiple inositol polyphosphate histidine phosphatase, 1	Phosphatase Set	ATGAAATTCTTCCTACTTATA	-1.83	1.06013
MINPP1	9562	multiple inositol polyphosphate histidine phosphatase, 1	Phosphatase Set	CACGGTCAAACAGATCCGCAA	-1.16	1.22663
MINPP1	9562	multiple inositol polyphosphate histidine phosphatase, 1	Phosphatase Set	CCGAGTGCAGATGTTATTAAA	1.45	1.11154
MINPP1	9562	multiple inositol polyphosphate histidine phosphatase, 1	Phosphatase Set	AAGTCGGAAAGTACAATGAAA	-1.23	0.826842
MKNK1	8569	MAP kinase interacting serine/threonine kinase 1	Kinase Set	CAGCACGAAGAGAACGAACTA	0.02	1.09682
MKNK1	8569	MAP kinase interacting serine/threonine kinase 1	Kinase Set	AAGCACTTCAATGAGCGAGAA	1.95	1.14838
MKNK1	8569	MAP kinase interacting serine/threonine kinase 1	Kinase Set	CACGGACCAGGCCACATTCTA	-0.05	0.987124
MKNK1	8569	MAP kinase interacting serine/threonine kinase 1	Kinase Set	CAGAGACTTAGCGCCGCCCAA	1.1	1.09372
MKNK2	2872	MAP kinase interacting serine/threonine kinase 2	Kinase Set	CAGAACCGTTACTGTGAATGA	-1.16	0.845937
MKNK2	2872	MAP kinase interacting serine/threonine kinase 2	Kinase Set	ACGGTGAACGGCCATGTGTTA	0.02	1.09351
MKNK2	2872	MAP kinase interacting serine/threonine kinase 2	Kinase Set	CCGCTTCTACCTGGTGTTTGA	0	1.1257
MKNK2	2872	MAP kinase interacting serine/threonine kinase 2	Kinase Set	GGGCAGCGGCATCAAACTCAA	-0.62	1.0884
MLKL	197259	mixed lineage kinase domain-like	Kinase Set	CAGCATTGCAATAGTGAGGCA	0.49	0.941609
MLKL	197259	mixed lineage kinase domain-like	Kinase Set	TAGGTTTCAAGAGGCCTTATA	-0.05	0.903406
MLKL	197259	mixed lineage kinase domain-like	Kinase Set	CTCGCTGTTACTTCAGGTTGA	-0.03	1.00118
MLKL	197259	mixed lineage kinase domain-like	Kinase Set	CCAGATGCTAAGAAGAGATAA	0.04	0.905351
MOS	4342	v-mos Moloney murine sarcoma viral oncogene homolog	Kinase Set	CTCGGTGTACAAGGCGACTTA	0	0.95978
MOS	4342	v-mos Moloney murine sarcoma viral oncogene homolog	Kinase Set	CGCGAACATCTTGATCAGTGA	-0.46	0.915682
MOS	4342	v-mos Moloney murine sarcoma viral oncogene homolog	Kinase Set	TTCGGTGGCAACGTCACTTTA	0	0.956684
MOS	4342	v-mos Moloney murine sarcoma viral oncogene homolog	Kinase Set	CGCGGTGTTCCTGTGGCCATA	0.06	1.04019
M-RIP	23164	myosin phosphatase-Rho interacting protein	Phosphatase Set	GCGACGGTTCTTCATCCTTTA	-0.77	1.10035
M-RIP	23164	myosin phosphatase-Rho interacting protein	Phosphatase Set	AAGCGGGACTTCACCAATGAA	0.64	1.0873
M-RIP	23164	myosin phosphatase-Rho interacting protein	Phosphatase Set	CCGGACCAACAAGCAGAATCA	-0.02	0.993206
M-RIP	23164	myosin phosphatase-Rho interacting protein	Phosphatase Set	CGGGAGCTAGAGAAACTTCGA	-0.86	0.862542
MST1R	4486	macrophage stimulating 1 receptor (c-met-related tyrosine kinase)	Kinase Set	CAGGTCTGCGTAGATGGTGAA	0.42	1.04232
MST1R	4486	macrophage stimulating 1 receptor (c-met-related tyrosine kinase)	Kinase Set	TCCCGGTGACACAGACACAAA	2.44	1.15229
MST1R	4486	macrophage stimulating 1 receptor (c-met-related tyrosine kinase)	Kinase Set	ATGGAGCATCCTTCTCCGATA	-0.8	1.19286
MST1R	4486	macrophage stimulating 1 receptor (c-met-related tyrosine kinase)	Kinase Set	CACGGGAGCCTTCGTATACTT	0.15	1.04294
MTM1	4534	myotubularin 1	Phosphatase Set	CGGTATGAGTGGGAAACGAAA	0	1.0027
MTM1	4534	myotubularin 1	Phosphatase Set	CGAATAGGTCATGGTGATAAA	-0.15	1.09262
MTM1	4534	myotubularin 1	Phosphatase Set	TCGGTATGAGTGGGAAACGAA	2.57	1.09031
MTM1	4534	myotubularin 1	Phosphatase Set	GACATTGTTTATCCTAATGTA	0.27	0.990139
MTMR2	8898	myotubularin related protein 2	Phosphatase Set	TAGGATGAGTTTAGAACTGTA	-1.22	1.12012
MTMR2	8898	myotubularin related protein 2	Phosphatase Set	AACGATATGAACTTTGTGATA	2.59	1.41902
MTMR2	8898	myotubularin related protein 2	Phosphatase Set	CTGAGGGAGTCTAACAAGTTA	0.1	1.05985
MTMR2	8898	myotubularin related protein 2	Phosphatase Set	ACCACTGCAATTCACATTATA	0.8	0.918426
MTMR3	8897	myotubularin related protein 3	Phosphatase Set	AGCATGTAACTTCAAGGTTTA	0.23	1.14467
MTMR3	8897	myotubularin related protein 3	Phosphatase Set	GACCCTTATTACCGAACCATA	-0.12	1.27163
MTMR3	8897	myotubularin related protein 3	Phosphatase Set	TTGCCTTTAGCCGAATGTAAA	-0.1	0.967985
MTMR3	8897	myotubularin related protein 3	Phosphatase Set	CAGCCTTAAATCAAGAATATT	-0.98	0.884865
MTMR4	9110	myotubularin related protein 4	Phosphatase Set	CCGGCTGCATATCAAATTCAA	0.76	1.19993
MTMR4	9110	myotubularin related protein 4	Phosphatase Set	TCGGCACTGGAGAGTACCAAA	-3.42	0.899512
MTMR4	9110	myotubularin related protein 4	Phosphatase Set	TTGCCATAGATGTAACCTAAA	-0.16	0.979954
MTMR4	9110	myotubularin related protein 4	Phosphatase Set	AAGAGTGGCTCTCACGGCTAA	0.52	0.97494
MTMR6	9107	myotubularin related protein 6	Phosphatase Set	AAGGGAAGTACAGATAGTTTA	-2.03	1.10152
MTMR6	9107	myotubularin related protein 6	Phosphatase Set	CCCGGATAGCAAGCAAACCAA	-0.29	1.13452
MTMR6	9107	myotubularin related protein 6	Phosphatase Set	CCCGTAAATGATGCTCTTCGA	-0.58	0.973698
MTMR6	9107	myotubularin related protein 6	Phosphatase Set	TACAAAGTTACTGTTTAACAA	-0.39	0.929048
MTMR8	55613	myotubularin related protein 8	Phosphatase Set	TGCCATGAGGTTTATATTTCA	-1	1.01569
MTMR8	55613	myotubularin related protein 8	Phosphatase Set	CAGCCCAAGCAGAGTATGCTA	-0.77	0.996846
MTMR8	55613	myotubularin related protein 8	Phosphatase Set	CGGGAAGATCTAAGAGTCTAT	-0.83	1.0379
MTMR8	55613	myotubularin related protein 8	Phosphatase Set	GGGAATTACTTTACTGATTAA	0.14	0.876367
MTMR9	66036	myotubularin related protein 9	Phosphatase Set	TACGTTGGAATAGATCCTCTA	-0.49	1.09409
MTMR9	66036	myotubularin related protein 9	Phosphatase Set	CAGACCTAGTATTCTAAGTTA	0.14	1.07943
MTMR9	66036	myotubularin related protein 9	Phosphatase Set	CAGGTCTAAGGATTAACTATA	0.43	1.0876
MTMR9	66036	myotubularin related protein 9	Phosphatase Set	ATGCCTGAACCTGTTATCTAA	2.49	0.91258
MTOR	2475	mechanistic target of rapamycin (serine/threonine kinase)	Kinase Set	CAGGCCTATGGTCGAGATTTA	0	1.0368
MTOR	2475	mechanistic target of rapamycin (serine/threonine kinase)	Kinase Set	ACTCGCTGATCCAAATGACAA	-8.11	0.859684
MTOR	2475	mechanistic target of rapamycin (serine/threonine kinase)	Kinase Set	CCGGAGTGTTAGAATATGCCA	-1.5	0.889214
MTOR	2475	mechanistic target of rapamycin (serine/threonine kinase)	Kinase Set	CAGATTATTAACAGGGTTCGA	1.31	1.1185
MUSK	4593	muscle, skeletal, receptor tyrosine kinase	Kinase Set	TTGAGGATTCATAACGTACAA	2.82	1.06024
MUSK	4593	muscle, skeletal, receptor tyrosine kinase	Kinase Set	ACGGCCTGGAATGAACTGAAA	0.42	1.04577
MUSK	4593	muscle, skeletal, receptor tyrosine kinase	Kinase Set	CAGCAGACTACTACAAAGCTA	1.73	1.1091
MUSK	4593	muscle, skeletal, receptor tyrosine kinase	Kinase Set	CTGGAGTAGTGCCTACTCCTA	1.06	1.10256
MVK	4598	mevalonate kinase	Kinase Set	GCGGTGGGCCTGGTTAAATAA	-3.33	0.790383
MVK	4598	mevalonate kinase	Kinase Set	CCGCTTGGCGATGCCAGCCAA	-6.95	0.699449
MVK	4598	mevalonate kinase	Kinase Set	CAAGGAGGATTTGGAGCTAAT	-3.74	1.0602
MVK	4598	mevalonate kinase	Kinase Set	CTGGAGCAAGGTGATGTCACA	-2.11	0.801761
MYLK	4638	myosin light chain kinase	Kinase Set	CAGCATCCATGGCTAATGAAA	0.71	0.845484
MYLK	4638	myosin light chain kinase	Kinase Set	AGCACCTAGTGTGATAGATTA	-1.93	0.871222
MYLK	4638	myosin light chain kinase	Kinase Set	CAGCGTTATTGATGGGCATTA	0.07	1.09434
MYLK	4638	myosin light chain kinase	Kinase Set	CAGCTAGATTTCATTTAGGGA	0.01	1.08645
MYLK2	85366	myosin light chain kinase 2	Kinase Set	AACGCTGTAACCGACGCCTTA	0.57	1.15072
MYLK2	85366	myosin light chain kinase 2	Kinase Set	CGGGATCCTCTTCATGCACAA	-0.61	1.02986
MYLK2	85366	myosin light chain kinase 2	Kinase Set	CCGCAATCTGATCCAGCTGTA	-1.27	1.064
MYLK2	85366	myosin light chain kinase 2	Kinase Set	CACCGGGCATTTGGTGAAGAT	0.13	1.16622
MYLK3	91807	myosin light chain kinase 3	Kinase Set	ACGGAGGACAATGACCTTGCA	-0.67	0.911932
MYLK3	91807	myosin light chain kinase 3	Kinase Set	AACCGTAGGATATGCAAGAAA	0.99	1.03886
MYLK3	91807	myosin light chain kinase 3	Kinase Set	CAGGTGAGCAGCTTTAGTCAA	0	0.988412
MYLK3	91807	myosin light chain kinase 3	Kinase Set	AAGGCTAACCCTTGTTGGGAA	-0.67	1.10126
MYLK4	340156	myosin light chain kinase family, member 4	Kinase Set	CAGCTTCTATACTGTGAGCAA	-0.01	1.00678
MYLK4	340156	myosin light chain kinase family, member 4	Kinase Set	ATCGGGATGCTAAGCAAATAA	0.05	1.05065
MYLK4	340156	myosin light chain kinase family, member 4	Kinase Set	TGGCGAATAAGTGCAAGCGAA	-0.66	1.04145
MYLK4	340156	myosin light chain kinase family, member 4	Kinase Set	GACGGAAAGGATGCCCGTCAA	1.58	1.09833
NADK	65220	NAD kinase	Kinase Set	AAAGAGCGTCCTTGTCATCAA	0.06	0.931662
NADK	65220	NAD kinase	Kinase Set	CAGCATCACTACCTCATGCTA	3.12	1.08502
NADK	65220	NAD kinase	Kinase Set	ATGACTCGACCTGTCCTTCAA	0	1.03718
NADK	65220	NAD kinase	Kinase Set	ACCGAAGTTCTCATTTCCTGA	-0.15	1.03291
NAGK	55577	N-acetylglucosamine kinase	Kinase Set	CCCGGTCTTGTTCCAGGGCAA	-2.74	0.82378
NAGK	55577	N-acetylglucosamine kinase	Kinase Set	ACCTGAGTGAAAGCTACTTAA	-0.25	0.956987
NAGK	55577	N-acetylglucosamine kinase	Kinase Set	CAGGTCAGTGATGTGTCCTAA	-2.97	0.879016
NAGK	55577	N-acetylglucosamine kinase	Kinase Set	CCCATGGACTATAGCGCCAAT	0.33	1.04384
NEK1	4750	NIMA (never in mitosis gene a)-related kinase 1	Kinase Set	ATGGCTCTCTCTACATAGTAA	0	1.04372
NEK1	4750	NIMA (never in mitosis gene a)-related kinase 1	Kinase Set	ACCGTAGGAGATGTTCGTCAA	2.38	1.13467
NEK1	4750	NIMA (never in mitosis gene a)-related kinase 1	Kinase Set	TAGGGATAGACCATCAGTCAA	2.42	1.38393
NEK1	4750	NIMA (never in mitosis gene a)-related kinase 1	Kinase Set	CAGAATAAAGCTCGAGCCGAA	0.15	1.00944
NEK10	152110	#N/A	Kinase Set	CCGGAACACCGTCACATGTCA	-0.17	0.737972
NEK10	152110	#N/A	Kinase Set	TTCGATGATATCAGATGTCAT	0.9	0.962553
NEK10	152110	#N/A	Kinase Set	CAGGGCCCACATTAAGGAAAT	0	1.12464
NEK10	152110	#N/A	Kinase Set	CAGCACTAACATGCTGTCCTT	-2.84	0.824151
NEK11	79858	NIMA (never in mitosis gene a)- related kinase 11	Kinase Set	AGGATACTTCATCGAGACTTA	-0.07	1.0043
NEK11	79858	NIMA (never in mitosis gene a)- related kinase 11	Kinase Set	GGCCGAGATCTGGACGATAAA	0.32	1.14477
NEK11	79858	NIMA (never in mitosis gene a)- related kinase 11	Kinase Set	CTGGGAGTTGACTACATGCAT	-0.45	1.08813
NEK11	79858	NIMA (never in mitosis gene a)- related kinase 11	Kinase Set	CTCCACGAACTTGAATCAATT	1.1	0.925482
NEK2	4751	NIMA (never in mitosis gene a)-related kinase 2	Kinase Set	TTACGAGGATGTTAAACTTAA	0.36	1.01112
NEK2	4751	NIMA (never in mitosis gene a)-related kinase 2	Kinase Set	CAGGCGAATTCCATACCGTTA	6.37	1.24092
NEK2	4751	NIMA (never in mitosis gene a)-related kinase 2	Kinase Set	TTCGTGAACTGAAACATCCAA	-0.05	1.08799
NEK2	4751	NIMA (never in mitosis gene a)-related kinase 2	Kinase Set	ACCTACTTCTTTCCCACTAAA	-0.6	1.02063
[truncated: 1,786 more rows]
